# Supplementary material for: The use of triclosan-coated sutures to prevent surgical site infections: a systematic review and meta-analysis of the literature
Source: PubMed Central journal article supplement — BMJ Open. 2019 Sep 3;9(9):e029727. doi: 10.1136/bmjopen-2019-029727 (PMC6731927; doi:10.1136/bmjopen-2019-029727), 2019-09-03
Supplement: bmjopen-2019-029727.draft_revisions.pdf [file bmjopen-2019-029727.draft_revisions.pdf]

# BMJ Open

BMJ Open is committed to open peer review. As part of this commitment we make the peer review history of every article we publish publicly available.

When an article is published we post the peer reviewers' comments and the authors' responses online. We also post the versions of the paper that were used during peer review. These are the versions that the peer review comments apply to.

The versions of the paper that follow are the versions that were submitted during the peer review process. They are not the versions of record or the final published versions. They should not be cited or distributed as the published version of this manuscript.

BMJ Open is an open access journal and the full, final, typeset and author-corrected version of record of the manuscript is available on our site with no access controls, subscription charges or pay-per-view fees (<http://bmjopen.bmj.com>).

If you have any questions on BMJ Open's open peer review process please email [info.bmjopen@bmj.com](mailto:info.bmjopen@bmj.com)

# BMJ Open

## The use of triclosan coated sutures to prevent surgical site infections: a systematic review and meta-analysis of the literature

|                               |                                                                                                                                                                                                                                                                                                                                                                                                                           |
|-------------------------------|---------------------------------------------------------------------------------------------------------------------------------------------------------------------------------------------------------------------------------------------------------------------------------------------------------------------------------------------------------------------------------------------------------------------------|
| Journal:                      | <i>BMJ Open</i>                                                                                                                                                                                                                                                                                                                                                                                                           |
| Manuscript ID                 | bmjopen-2019-029727                                                                                                                                                                                                                                                                                                                                                                                                       |
| Article Type:                 | Research                                                                                                                                                                                                                                                                                                                                                                                                                  |
| Date Submitted by the Author: | 12-Feb-2019                                                                                                                                                                                                                                                                                                                                                                                                               |
| Complete List of Authors:     | Ahmed, Imran; University of Warwick, Clinical Trials Unit<br>Boulton, Adam; University of Warwick Warwick Medical School;<br>University Hospital Coventry<br>Rizvi, Sana; University Hospital Coventry<br>Carlos, William; University Hospital Coventry<br>Dickenson, Edward; University of Warwick, Warwick Medical School<br>Smith, NA; University of Warwick, Clinical Sciences Research<br>Laboratories<br>Reed, Mike |
| Keywords:                     | Surgical site infection, Triclosan, Systematic review                                                                                                                                                                                                                                                                                                                                                                     |
|                               |                                                                                                                                                                                                                                                                                                                                                                                                                           |

SCHOLARONE™  
Manuscripts

# The use of triclosan coated sutures to prevent surgical site infections: a systematic review and meta-analysis of the literature

Imran Ahmed<sup>(1,2)</sup> ([imran.ahmed4@nhs.net](mailto:imran.ahmed4@nhs.net)), Adam Boulton<sup>(1,2)</sup> ([adam.boulton@hotmail.com](mailto:adam.boulton@hotmail.com)), Sana Rizvi<sup>(2)</sup> ([sana.rizvi@nhs.net](mailto:sana.rizvi@nhs.net)). William J Carlos<sup>(2)</sup> ([William.carlos@nhs.net](mailto:William.carlos@nhs.net)), Edward Dickenson<sup>(1,2)</sup> ([e.j.l.dickenson@warwick.ac.uk](mailto:e.j.l.dickenson@warwick.ac.uk)), Nicholas Smith<sup>(1)</sup> ([nickasmith@doctors.net.uk](mailto:nickasmith@doctors.net.uk)), Mike Reed<sup>(4)</sup> ([mike.reed@nhs.net](mailto:mike.reed@nhs.net))

1: University of Warwick, Clinical trials Unit, Warwick Medical school, CSRL, UHCW, Coventry CV22DX, Coventry CV4 7AL

2: University Hospital Coventry and Warwickshire, Clifford Bridge Road, Coventry, CV2 2DX

3: Northumbria Healthcare NHS Foundation Trust, Northumberland, NE23 6NZ

Corresponding author

Imran Ahmed

University of Warwick, Warwick Clinical trials Unit, Warwick Medical school, Gibbett Hill Campus, Coventry CV4 7AL

[Imran.ahmed4@nhs.net](mailto:Imran.ahmed4@nhs.net)

02476968630

Orchid ID: 0000-0003-2774-9954

## 1 **ABSTRACT**

### 2 3 4 Introduction and objectives

5  
6 Surgical site infections represent a common and serious complication of all surgery. Sutures can lead to  
7  
8 the development of surgical site infections as micro-organisms can colonise the suture as it is implanted  
9  
10 the skin. Triclosan coated sutures are antibacterial sutures aimed at reducing surgical site infections.  
11  
12  
13 Our objective is to systematically review and summarise the available evidence assessing the effectiveness  
14  
15 of triclosan coated sutures in preventing surgical site infections.  
16  
17

### 18 19 Methods

20  
21 A systematic review of EMBASE, MEDLINE, AMED and CENTRAL was performed to identify full text  
22  
23 randomised controlled trials.  
24  
25

### 26 27 Intervention

28  
29 Triclosan coated sutures versus non triclosan coated sutures.  
30

### 31 32 Primary outcome

33  
34 Our primary outcome was the development of surgical site infections at 30 days post operatively. A meta-  
35  
36 analysis was performed using a random effects model.  
37

### 38 39 Results

40  
41 Twenty one RCTs were included involving 11,248 participants. Triclosan coated sutures were used in 5656  
42  
43 participants and non triclosan coated sutures were used in 5592. Triclosan coated sutures significantly  
44  
45 reduced the risk of surgical site infections at 30 days (RR 0.74, 95% CI 0.64 to 0.86). Further sensitivity  
46  
47 analysis demonstrated that triclosan coated sutures significantly reduced the risk of surgical site infections  
48  
49 in both clean and contaminated surgery.  
50  
51

### 52 53 Conclusion

54  
55 Triclosan coated sutures have been shown to significantly reduced the risk of surgical site infections when  
56  
57 compared to standard sutures. This is in agreement with previous work in this area. This study  
58  
59 represented the largest review to date in this area. Further work may be required in specific categories of  
60

1 surgery e.g. dirty or clean contaminated. Heterogeneity of the included studies should be noted when  
2  
3 interpreting the results of this review.  
4

#### 5 Registration

6 PROSPERO (Reference: CRD42014014856).  
7  
8  
9  
10  
11  
12

#### 13 Key words

14 Surgical site infection, triclosan, systematic review  
15  
16  
17

### 18 **Article summary**

#### 19 Strengths and limitations of this study

##### 20 Strengths

- 21 • Systematic nature of data collection and analysis
- 22 • Largest review to date in this topic area
- 23 • Analyses performed comparing difference classifications of surgery i.e. clean, clean-contaminated,  
24 contaminated and dirty.

##### 25 Limitations

- 26 • Heterogenous nature of included studies. E.g. different age of participants, co-morbidities and  
27 surgery type.

#### 28 Original protocol

29 A protocol for this review was prospectively registered with PROSPERO (Reference: CRD42014014856).  
30  
31  
32

#### 33 Funding statement

34 This research received no specific grant from any funding agency in the public, commercial or not-for-  
35 profit sectors  
36  
37

#### 38 Competing interests

39 All authors report no competing interests.  
40  
41  
42  
43  
44  
45  
46  
47  
48  
49  
50

51 Word count: 2990  
52  
53  
54  
55  
56  
57  
58  
59  
60

## INTRODUCTION

Surgical site infections (SSIs) represent a common complication throughout all surgical procedures<sup>1</sup>. It is estimated that SSIs account for 5% of all surgical complications<sup>2</sup> and 20% of all healthcare associated infections<sup>3,4</sup>. It is generally believed that the number of surgical procedures, in particular in elective orthopaedics<sup>5</sup>, will increase over the next decade, therefore increasing the incidence of SSIs. SSIs are associated with prolonged hospital admission<sup>6</sup> and increased morbidity and mortality<sup>7,8,9</sup>. In addition to having a significant impact on patient care and experience, SSIs also add substantial costs to healthcare providers. It is estimated that SSIs cost UK healthcare services approximately £61 million in 2012<sup>10</sup> and figures from the US highlight the extensive cost of SSIs with an estimated additional \$2300 per case<sup>11</sup>. Furthermore, Fleck *et al.* found that the mean cost of treated a SSI following sternal wound incision was \$11,200<sup>12</sup>. These are conservative estimates as active surveillance of SSIs not routinely performed<sup>6</sup>.

Due to the wide ranging deleterious effects of SSIs and their treatment, particularly in the context of increasing numbers of surgical procedures, there is a clinical need to reduce the incidence of SSIs. SSIs are multifactorial with patient factors such as age, co-morbidities including diabetes, and immunosuppression<sup>7,13-15</sup> contributing to their development along with surgical factors. Many patient factors may not be optimised and hence research focus has been placed on surgical factors, including suture material.

SSIs may arise from suture material when bacteria colonise the material<sup>16</sup> and as it passes through the skin a biofilm<sup>17</sup> is created. This biofilm establishes an immunity from both antimicrobial treatment and the host immune system<sup>6,18</sup>. Once this biofilm develops there is an increased chance of a SSI developing. Research has shown bacteria may colonise monofilament and braided sutures<sup>17,19,20</sup>. With this in mind, considerable work has been carried out since the 1950s in coating suture material with an antimicrobial, including silver<sup>21,22</sup>. Triclosan (polychlorophenoxyphenol) has been used for its antiseptic properties for

1 many years in toothpaste<sup>24</sup> and soap<sup>5</sup> and has an established safety profile<sup>5</sup>. Despite its widespread use  
2  
3 there have been no identified incidences of resistance<sup>24</sup>. Triclosan has been used to successfully coat the  
4  
5 following sutures and gained FDA approval in 2002<sup>23</sup>: braided polyglactan 910 (Vicryl Plus), poliglecaprone  
6  
7  
8 25 (Monocryl Plus) and polydioxanone (PDS Plus).  
9

10  
11  
12  
13 *In vitro* and *in vivo* studies have shown the effectiveness of triclosan coated sutures<sup>24-26</sup> in killing bacteria  
14  
15 associated with SSIs and inhibiting colonisation of suture material, with one study demonstrating a 66%  
16  
17 reduction in bacterial colonisation<sup>27</sup>. Since then a large number of randomised control trials (RCTs) have  
18  
19 been performed with contrasting results in the effectiveness of triclosan coated sutures in preventing  
20  
21 SSIs. Subsequent meta-analyses have also produced conflicting results and hence the true effect remains  
22  
23 unclear<sup>6,7,28-33</sup>. The most recent and largest systematic review to date was performed by De Jonge *et al.*  
24  
25 and found triclosan coated sutures significantly reduced the incidence of SSIs<sup>33</sup>. This review searched the  
26  
27 literature until November 2015 and included 6462 patients from RCTs published in peer-reviewed journals  
28  
29 as well as conference abstracts. Performing robust methodological appraisal on conference abstracts is  
30  
31 not possible and they do not permit thorough risk of bias assessments. As they have not undergone the  
32  
33 formal journal peer-review process, they represent a potentially biased and unreliable source of data.  
34  
35 Since this review a number of large, high quality RCTs have been produced<sup>34,35</sup>. Of note, a recent RCT of  
36  
37 2546 patients found that triclosan coated sutures did not reduce the incidence of SSIs; a finding in contrast  
38  
39 to the previous systematic review<sup>33,35</sup>. This represents a substantial increase in the number of patients  
40  
41 available for meta-analysis since the last review. There is therefore a timely need to undertake a further  
42  
43 systematic review and meta-analysis to assimilate the current evidence and inform clinical practice.  
44  
45  
46  
47  
48  
49  
50  
51  
52  
53

54 This systematic review and meta-analysis aims to determine whether the use of triclosan coated sutures  
55  
56 reduces the incidence of SSIs in comparison to standard non-coated sutures.  
57  
58  
59  
60

## PICOS statement

The included population is patients of any age and gender undergoing any surgical procedure utilising sutures to close the wound. The intervention studied is the use of triclosan coated sutured and comparison is made with non-triclosan coated sutures. The outcomes assessed are the rates of SSIs, including superficial and deep SSIs. This systematic review will only include RCTs.

## METHODS

A systematic review of the available literature was conducted and is reported in accordance with the Preferred Reporting Items for Systematic Reviews and Meta-Analyses (PRISMA) guidance<sup>36</sup>. A protocol for this review was prospectively registered with PROSPERO (Reference: CRD42014014856).

### Search methods

Electronic searches were conducted using OVID SP on the following databases: MEDLINE(1946-March Week 5 2018); Excerpta Medica Database (EMBASE) (1974 to 2018 April 10); Allied and Complementary Medicine (AMED) (1985 to March 2018); and Cochrane Central Register of Controlled Trials (CENTRAL). A multi-purpose search was performed for all terms and the search terms were: "Triclosan", "Anti-bacterial agents", "Anti-infective agents, local", "Coated materials, biocompatible", "Biomimetic material", "Sutures", "Vicryl Plus", "Monocryl Plus", "PDS Plus", "Surgical site infection", "Surgical Wound infection".

The search was conducted on 10<sup>th</sup> April 2018.

### Selection of Studies

Two authors (IA and AB) independently selected studies for inclusion. Any disagreement was resolved by a third author (ED). Titles and abstracts were screened and full texts obtained for any studies of interest.

The eligibility criteria were formed from the PICOS statement and registered on PROSPERO prior to



1 undertaking the search. Only RCTs published in peer-reviewed journals presenting new data were  
2  
3 included.

#### 6 **Data extraction**

8  
9 Data was independently extracted from eligible included studies onto predetermined forms by two  
10  
11 authors (IA and AB). Any discrepancies were then resolved. Data extracted included baseline patient  
12  
13 characteristics, surgical procedures performed, number of centres, suture material, SSI diagnostic criteria,  
14  
15 length of follow up, routine prophylactic antibiotic use and number of SSIs. Data regarding superficial of  
16  
17 deep SSI was extracted when possible. Information regarding randomisation, blinding, funding and  
18  
19 country of origin was extracted.  
20  
21  
22

#### 24 **Assessment of Risk of Bias**

26  
27 Two authors (IA and AB) independently appraised eligible studies according to the Cochrane  
28  
29 Collaboration's risk of bias tool, resolving any discrepancies with a third author (ED) as necessary<sup>37</sup>. Review  
30  
31 Manager version 5.3 (The Nordic Cochrane Centre, The Cochrane Collaboration, 2014) was used to  
32  
33 generate the summary figures.  
34  
35

36  
37 Publication bias was assessed following construction of a funnel plot in order to identify the presence or  
38  
39 absence of bias of this kind.  
40  
41

#### 42 **Statistical analysis**

44  
45 A random effects model was used to calculate the predominant relative risk (RR) and the 95% confidence  
46  
47 intervals of the studies included. A random effects model was used under the assumption all studies  
48  
49 represented a clinically heterogeneous population<sup>38</sup>. Statistically heterogeneity was first assessed using a  
50  
51 funnel plot and more formally using the  $I^2$  statistic<sup>39</sup>. Forest plots were then generated summarising the  
52  
53 results of the meta-analysis using Review Manager 5.3.  
54  
55

#### 57 **Patient and Public Involvement**

58  
59 Patient and public members were not involved in the development and conduct of this review.  
60

## RESULTS

The search revealed 255 records of possible relevance. No other sources of records were identified. Removal of duplicates left 242 records to be examined. 209 records were excluded based on title and abstract screening. 26 full texts were assessed for eligibility and 21 studies were included in the meta-analysis (see figure 1)<sup>2,7,11,34,35,40-55</sup>.

### Study characteristics

Study characteristics are summarised in table 1. Twenty-one RCTs were included in this review involving 11,248 patients<sup>2,7,11,34,35,40-55</sup>. There were 5,656 patients randomised to triclosan coated sutures and 5592 patients to standard sutures. In studies which reported mean age, the mean age was comparable between the two groups (56.63 vs 56.63). Seven studies were multi-centre<sup>2,7,35,40,50,53,55</sup>, with the remainder single-centre studies (n=14)<sup>11,34,41-49,51,52,54</sup>. Vicryl was compared with Vicryl Plus in ten studies<sup>11,35,41-43,45,48-51</sup>, two studies compared PDS and versus PDS Plus<sup>7,40</sup>, one study compared PDS II with PDS II Plus<sup>46</sup>, one study compared Monocryl against Monocryl Plus<sup>47</sup>, one compared Chinese silk with Vicryl Plus<sup>55</sup>, four studies compared Vicryl and Monocryl versus Vicryl Plus and Monocryl Plus<sup>34,52-54</sup>, and two studies compared Vicryl and PDS versus Vicryl Plus and PDS Plus<sup>2,44</sup>.

To define SSI, the CDC criteria were used by 14 studies<sup>2,7,11,34,35,43-46,50,52-55</sup>, clinical diagnosis was used by two studies<sup>41,47</sup>, positive wound culture and clinical judgement was used by one study<sup>51</sup>, and four did not provide explicit definitions<sup>40,42,48,49</sup>. Twelve studies used a follow up duration of 30 days or one month or four weeks<sup>2,7,11,34,35,40,43-45,51,53,55</sup>, two for two weeks<sup>46,47</sup>, one for six weeks<sup>54</sup>, one for 80 days<sup>42</sup>, one for one year<sup>48</sup>, one until discharge<sup>49</sup>, and one study did not specify a follow-up regime<sup>41</sup>. Routine prophylactic antibiotics were used in 15 studies<sup>2,7,11,35,40,41,44,46-53</sup>, no prophylactic antibiotics were used in one study<sup>42</sup>, one used prophylactic antibiotics in high risk patients only<sup>54</sup>, one study used prophylactic antibiotics in 30% of participants<sup>34</sup>, and three did specify prophylactic antibiotic use<sup>43,45,55</sup>.

## 1 Surgical site infection

2  
3 The risk of developing surgical site infection was significantly reduced in the triclosan group compared to  
4  
5 the standard suture group (RR 0.74, 95% CI 0.64 to 0.86). Heterogeneity was low to moderate ( $\chi^2=24.66$ ,  
6  
7  $P=0.21$ ,  $I^2=19\%$ ). There were 400 instances of SSI amongst 5656 patients in the triclosan coated suture  
8  
9 group and 543 SSIs in 5592 patients in the standard suture group. See figure 2.  
10  
11

## 12 Sub-group analysis

13  
14  
15 Seven studies reported superficial and deep infections separately<sup>2,7,34,35,44,48,53</sup>. There were 144/3421  
16  
17 cases of superficial SSI in the triclosan group and 146/3535 cases in the standard suture group, producing  
18  
19 a meta-analysis risk ratio of 1.01 (95% CI 0.79 to 1.28). The risk of developing a deep infection was lower  
20  
21 in the triclosan group when compared to the standard suture group, however this was not significant (RR  
22  
23 0.75, 95% CI 0.52 to 1.08). There were 60/3421 cases of deep infections in the triclosan group and 84/3535  
24  
25 cases in the standard suture group. See figure 3.  
26  
27  
28

29  
30 Nine studies reported the incidence of surgical site infection for clean surgery<sup>34,35,41,45,51-55</sup>. Triclosan  
31  
32 coated sutures were associated with a significantly lower incidence of SSI when compared to standard  
33  
34 sutures (RR 0.72, 95% CI 0.58 to 0.89).  
35  
36

37  
38 Five studies reported clean contaminated surgery and there was no difference between the two groups  
39  
40 (RR 1.01, 95% CI 0.82,1.26)<sup>2,7,42,44,48</sup>.  
41

42  
43 Two studies reported the incidence of surgical site infections in contaminated surgery<sup>11,49</sup>. Triclosan  
44  
45 coated sutures were associated with a significantly lower risk of SSI when compared to standard sutures  
46  
47 (RR 0.42, 95% CI 0.2 to,0.79).  
48

49  
50 Two further studies reported the incidence of surgical site infection for dirty surgery<sup>47,50</sup>. There was no  
51  
52 significant difference in the incidence of SSIs between the two groups of sutures (RR 0.74, 95% CI 0.46 to  
53  
54 1.18). See figure 4.  
55  
56  
57  
58  
59  
60

## Risk of bias

There was a variability in the included studies risk of bias as assessed by the Cochrane risk of bias tool.

The results of the risk of bias screening can be seen on figure 1.

Publication bias was assessed using a funnel plot. The distribution of studies in the funnel plot was symmetrical. No evidence was found for publication bias in this analysis (figure 5).

Statistical heterogeneity was assessed using the Tau<sup>2</sup> (0.02) test and the I<sup>2</sup> (22%) test, indicating there is low heterogeneity between the studies included in this review.

## DISCUSSION

This large systematic review of 21 randomised clinical trials included 11,248 patients and there were 943 instances of SSI. The subsequent meta-analysis supports the use of triclosan-coated sutures in reducing the risk of surgical site infections. We report a significantly lower risk of SSI when triclosan coated sutures were used, compared to standard sutures in RCTs. Triclosan coated sutures were used in a wide range of surgeries, including both adult and paediatric patients. The use of triclosan coated sutures significantly reduced the risk of SSI in meta-analyses of clean surgery and also contaminated surgery, and whilst this difference was not statistically significant in dirty surgery, the signal was toward reduced risk with triclosan coated sutures. Further subgroup analysis revealed a signal towards reduced risk of deep SSIs with triclosan coated sutures, however this was not statistically significant. Triclosan coated sutures appear to have no effect on the incidence of superficial SSIs.

Our results support the findings of Konstantelias et al who concluded that triclosan coated sutures were associated with a significantly lower risk of SSI when compared to standard sutures<sup>56</sup>. In addition, the authors concluded that triclosan coated sutures significantly reduced the risk of SSI in clean, clean-contaminated, and contaminated surgery; in agreement with our findings<sup>56</sup>. De Jonge et al reported a meta-analysis of 21 RCTs including 6462 patients, also concluding that triclosan coated sutures significantly reduced the risk of SSI compared to standard sutures<sup>33</sup>.

1 The strengths of this current review include the thorough and systematic nature of data collection. This  
2  
3 review represents the most up to date review of the literature and is the largest review of RCTs to date,  
4  
5 including 11,248 patients from 21 RCTs. A recent RCT in elective hip and knee surgery included 2546  
6  
7 participants, the largest RCT to date in this subject area. This review is the only review to include this  
8  
9 important and well-conducted study. In addition, this systematic review only included peer-reviewed  
10  
11 studies with published full texts. Previous meta-analyses have included conference abstracts which do  
12  
13 not go through the same rigorous peer-review process as full journal publications and thus represent a  
14  
15 potential danger to review quality<sup>33</sup>. Furthermore, robust quality and risk of bias assessment is not  
16  
17 possible with these abstract publications<sup>57</sup>. A further strength of this review is the detailed and systematic  
18  
19 quality assessments, along with robust Cochrane risk of bias assessments, of all included studies<sup>37,57</sup>.

20  
21  
22  
23  
24  
25  
26  
27 The main weakness of this review is the study population. As mentioned above the review includes  
28  
29 procedures which were classed as clean, clean- contaminated, contaminated, and dirty. These types of  
30  
31 surgery would all have a differing rates of SSI. The authors therefore performed sub-analyses of the  
32  
33 different categories of surgery. Routine antibiotic prophylaxis was used in 15 studies<sup>2,7,11,35,40,41,44,46-53</sup> with  
34  
35 a variation in the antibiotic agent used and the timing. This is a potential confounder for the frequency of  
36  
37 SSI<sup>58</sup>. A proportion of the included studies assessed patients with an underlying malignancy who may have  
38  
39 been immunosuppressed. This influences the rate of SSI and is not accounted for in many of the included  
40  
41 studies<sup>59</sup>. Another weakness is the heterogeneity in the use of triclosan coated sutures. In some studies,  
42  
43 triclosan was used for closure of all surgical layers, whereas in other studies triclosan coated sutures were  
44  
45 only used on the superficial layers. This study heterogeneity should be noted when interpreting the meta-  
46  
47 analysis result. This review reports trials using CDC criteria for superficial site infections. It is important to  
48  
49 note that a stitch abscess does not meet the criteria for a superficial site infections. Patients may present  
50  
51 with a stitch abscess to healthcare professionals and undergo treatment. This study does not report the  
52  
53 impact of surgical site infections on stitch abscesses.  
54  
55  
56  
57  
58  
59  
60

1  
2  
3 Our review is the largest review of RCTs to date in terms of patient numbers and demonstrates clinical  
4 effectiveness of triclosan coated sutures when compared to standard sutures when assessing SSI rate.  
5  
6 SSI have been shown to have a significant impact on patient quality of life as well as on healthcare  
7  
8 providers in terms of resource allocation. The cost of triclosan sutures is variable, however the cost of SSI  
9  
10 to patients and healthcare providers is sizeable<sup>10-12</sup>. A robust cost-analysis has not been performed,  
11  
12 nevertheless, organisations should consider carefully whether they routinely use triclosan coated sutures  
13  
14 in light of these positive meta-analysis findings. This review also identified that triclosan coated sutures  
15  
16 significantly reduced the risk of SSIs in clean and contaminated surgery, therefore thoughtful  
17  
18 consideration should be paid to whether they are routinely used in this patient population.  
19  
20  
21  
22  
23  
24  
25  
26  
27

## 28 **Conclusion**

29  
30 This systematic review identified 21 RCTs examining the effect of triclosan in reducing incidence of SSI,  
31  
32 compared with non-coated sutures. The subsequent meta-analysis included 11,248 patient and revealed  
33  
34 an overall a risk ratio of 0.74 (95% CIs 0.64 to 0.86) of developing SSI in favour of triclosan coated sutures,  
35  
36 thereby demonstrating a statistically significant lower risk of SSI following closure of a surgical wound  
37  
38 with triclosan coated sutures. Further analysis has demonstrated that triclosan coated sutures  
39  
40 significantly reduced the risk of SSIs in clean and contaminated surgery. This study is in agreement with  
41  
42 previous smaller and less robust reviews which have produced comparable results. This is the largest  
43  
44 review of RCTs in terms of patient numbers to demonstrate the clinical effectiveness of triclosan coated  
45  
46 sutures. Further detailed cost effectiveness is required to assess the economic benefit of implementing  
47  
48 the use of these sutures. Given the heterogeneous nature of the included population, the implementation  
49  
50 of triclosan coated sutures should be carefully considered on a specialty by specialty basis.  
51  
52  
53  
54  
55  
56  
57  
58  
59

## 60 **Acknowledgements**

1 The authors would like to acknowledge Andrew Sprowson who died unexpectedly on 13 March 2015.  
2  
3 Andrew played a key role in conceiving the idea for this review and provided the early supervision to  
4  
5 ensure this review took place successfully. Andrew was an academic orthopaedic surgeon who was  
6  
7 dedicated to improving evidence-based care in his field. He was an exceptional researcher, surgeon,  
8  
9 colleague and friend greatly missed by all of us.  
10  
11

### 12 Funding

13  
14  
15 This research received no specific grant from any funding agency in the public, commercial or not-for-  
16  
17 profit sectors  
18

### 19 Competing interests

20  
21  
22 The authors report no competing interests for this study  
23

### 24 Ethical Approval

25  
26  
27 No ethical approval required for this study.  
28

### 29 Data Statement

30  
31  
32 All raw data is available upon request.  
33

### 34 Author contributions

- 35  
36  
37 • IA: Conception of review, data collection, analysis, production of figures and final manuscript
- 38  
39 • AB: Data collection, analysis, production of figures and final manuscript
- 40  
41 • SR: Production of figures and revised final manuscript
- 42  
43 • WC: Production of figures and revised final manuscript
- 44  
45 • ED: Data collection and revision of final manuscript
- 46  
47 • NS: Revision of final manuscript
- 48  
49 • MR: Conception of idea and revision of final manuscript
- 50  
51  
52  
53  
54  
55  
56  
57  
58  
59  
60

1  
2  
3  
4  
5  
6  
7  
8  
9  
10  
11  
12  
13  
14  
15  
16  
17  
18  
19  
20  
21  
22  
23  
24  
25  
26  
27  
28  
29  
30  
31  
32  
33  
34  
35  
36  
37  
38  
39  
40  
41  
42  
43  
44  
45  
46  
47  
48  
49  
50  
51  
52  
53  
54  
55  
56  
57  
58  
59  
60  

## REFERENCES

1. Magill SS, Edwards JR, Bamberg W, et al. Multistate Point-Prevalence Survey of Health Care-Associated Infections. *The New England journal of medicine* 2014; **370**(13): 1198-208.
2. Mattavelli I, Rebori P, Doglietto G, et al. Multi-Center Randomized Controlled Trial on the Effect of Triclosan-Coated Sutures on Surgical Site Infection after Colorectal Surgery. *Surgical infections* 2015; **16**(3): 226-35.
3. Leaper DJ. Surgical-site infection. *The British journal of surgery* 2010; **97**(11): 1601-2.
4. Hranjec T, Swenson BR, Sawyer RG. Surgical site infection prevention: how we do it. *Surgical infections* 2010; **11**(3): 289-94.
5. Kurtz S, Ong K, Lau E, Mowat F, Halpern M. Projections of primary and revision hip and knee arthroplasty in the United States from 2005 to 2030. *The Journal of bone and joint surgery American volume* 2007; **89**(4): 780-5.
6. Chang WK, Srinivasa S, Morton R, Hill AG. Triclosan-impregnated sutures to decrease surgical site infections: systematic review and meta-analysis of randomized trials. *Annals of surgery* 2012; **255**(5): 854-9.
7. Diener MK, Knebel P, Kieser M, et al. Effectiveness of triclosan-coated PDS Plus versus uncoated PDS II sutures for prevention of surgical site infection after abdominal wall closure: the randomised controlled PROUD trial. *Lancet (London, England)* 2014; **384**(9938): 142-52.
8. de Lissovoy G, Fraeman K, Hutchins V, Murphy D, Song D, Vaughn BB. Surgical site infection: incidence and impact on hospital utilization and treatment costs. *American journal of infection control* 2009; **37**(5): 387-97.
9. Kirkland KB, Briggs JP, Trivette SL, Wilkinson WE, Sexton DJ. The impact of surgical-site infections in the 1990s: attributable mortality, excess length of hospitalization, and extra costs. *Infection control and hospital epidemiology* 1999; **20**(11): 725-30.
10. Namba RS, Inacio MC, Paxton EW. Risk factors associated with surgical site infection in 30,491 primary total hip replacements. *The Journal of bone and joint surgery British volume* 2012; **94**(10): 1330-8.
11. Nakamura T, Kashimura N, Noji T, et al. Triclosan-coated sutures reduce the incidence of wound infections and the costs after colorectal surgery: a randomized controlled trial. *Surgery* 2013; **153**(4): 576-83.
12. Fleck T, Moidl R, Blacky A, et al. Triclosan-coated sutures for the reduction of sternal wound infections: economic considerations. *The Annals of thoracic surgery* 2007; **84**(1): 232-6.
13. Neumayer L, Hosokawa P, Itani K, El-Tamer M, Henderson WG, Khuri SF. Multivariable predictors of postoperative surgical site infection after general and vascular surgery: results from the patient safety in surgery study. *Journal of the American College of Surgeons* 2007; **204**(6): 1178-87.
14. Malone DL, Genuit T, Tracy JK, Gannon C, Napolitano LM. Surgical site infections: reanalysis of risk factors. *The Journal of surgical research* 2002; **103**(1): 89-95.
15. Cheadle WG. Risk factors for surgical site infection. *Surgical infections* 2006; **7** Suppl 1: S7-11.
16. Katz S, Izhar M, Mirelman D. Bacterial adherence to surgical sutures. A possible factor in suture induced infection. *Annals of surgery* 1981; **194**(1): 35-41.
17. Kathju S, Nistico L, Tower I, Lasko LA, Stoodley P. Bacterial biofilms on implanted suture material are a cause of surgical site infection. *Surgical infections* 2014; **15**(5): 592-600.
18. Gristina AG, Price JL, Hobgood CD, Webb LX, Costerton JW. Bacterial colonization of percutaneous sutures. *Surgery* 1985; **98**(1): 12-9.
19. Kathju S, Nistico L, Hall-Stoodley L, Post JC, Ehrlich GD, Stoodley P. Chronic surgical site infection due to suture-associated polymicrobial biofilm. *Surgical infections* 2009; **10**(5): 457-61.
20. Kathju S, Nistico L, Lasko LA, Stoodley P. Bacterial biofilm on monofilament suture and porcine xenograft after inguinal herniorrhaphy. *FEMS immunology and medical microbiology* 2010; **59**(3): 405-9.



- 1 21. Darouiche RO, Meade R, Mansouri M, Raad, II. In vivo efficacy of antimicrobial-coated fabric from  
2 prosthetic heart valve sewing rings. *The Journal of heart valve disease* 1998; **7**(6): 639-46.
- 3 22. Blaker JJ, Nazhat SN, Boccaccini AR. Development and characterisation of silver-doped bioactive  
4 glass-coated sutures for tissue engineering and wound healing applications. *Biomaterials* 2004; **25**(7-8):  
5 1319-29.
- 6 23. Lairet JR, Bebarta VS, Burns CJ, et al. Prehospital interventions performed in a combat zone: a  
7 prospective multicenter study of 1,003 combat wounded. *The journal of trauma and acute care surgery*  
8 2012; **73**(2 Suppl 1): S38-42.
- 9 24. Storch ML, Rothenburger SJ, Jacinto G. Experimental efficacy study of coated VICRYL plus  
10 antibacterial suture in guinea pigs challenged with *Staphylococcus aureus*. *Surgical infections* 2004; **5**(3):  
11 281-8.
- 12 25. Ming X, Rothenburger S, Nichols MM. In vivo and in vitro antibacterial efficacy of PDS plus  
13 (polidioxanone with triclosan) suture. *Surgical infections* 2008; **9**(4): 451-7.
- 14 26. Rothenburger S, Spangler D, Bhende S, Burkley D. In vitro antimicrobial evaluation of Coated  
15 VICRYL\* Plus Antibacterial Suture (coated polyglactin 910 with triclosan) using zone of inhibition assays.  
16 *Surgical infections* 2002; **3** Suppl 1: S79-87.
- 17 27. Marco F, Vallez R, Gonzalez P, Ortega L, de la Lama J, Lopez-Duran L. Study of the efficacy of coated  
18 Vicryl plus antibacterial suture in an animal model of orthopedic surgery. *Surgical infections* 2007; **8**(3):  
19 359-65.
- 20 28. Wang ZX, Jiang CP, Cao Y, Ding YT. Systematic review and meta-analysis of triclosan-coated sutures  
21 for the prevention of surgical-site infection. *The British journal of surgery* 2013; **100**(4): 465-73.
- 22 29. Edmiston CE, Jr., Daoud FC, Leaper D. Is there an evidence-based argument for embracing an  
23 antimicrobial (triclosan)-coated suture technology to reduce the risk for surgical-site infections?: A meta-  
24 analysis. *Surgery* 2013; **154**(1): 89-100.
- 25 30. Sajid MS, Craciunas L, Sains P, Singh K, Baig M. Use of antibacterial sutures for skin closure in  
26 controlling surgical site infections: a systematic review of published randomized, controlled trials.  
27 *Gastroenterol Rep (Oxf)*; 2013: 42-50.
- 28 31. Daoud FC, Edmiston CE, Leaper D. Meta-Analysis of Prevention of Surgical Site Infections following  
29 Incision Closure with Triclosan-Coated Sutures: Robustness to New Evidence. *Surgical infections*; 2014:  
30 165-81.
- 31 32. Guo J, Pan LH, Li YX, et al. Efficacy of triclosan-coated sutures for reducing risk of surgical site  
32 infection in adults: a meta-analysis of randomized clinical trials. *The Journal of surgical research* 2016;  
33 **201**(1): 105-17.
- 34 33. de Jonge SW, Ateama JJ, Solomkin JS, Boermeester MA. Meta-analysis and trial sequential analysis  
35 of triclosan-coated sutures for the prevention of surgical-site infection. *The British journal of surgery* 2017;  
36 **104**(2): e118-e33.
- 37 34. Renko M, Paalanne N, Tapiainen T, et al. Triclosan-containing sutures versus ordinary sutures for  
38 reducing surgical site infections in children: a double-blind, randomised controlled trial. *The Lancet*  
39 *Infectious diseases* 2017; **17**(1): 50-7.
- 40 35. Sprowson AP, Jensen C, Parsons N, et al. The effect of triclosan-coated sutures on the rate of  
41 surgical site infection after hip and knee arthroplasty: a double-blind randomized controlled trial of 2546  
42 patients. *The bone & joint journal* 2018; **100-b**(3): 296-302.
- 43 36. Moher D, Liberati A, Tetzlaff J, Altman DG. Preferred reporting items for systematic reviews and  
44 meta-analyses: the PRISMA statement. *PLoS medicine* 2009; **6**(7): e1000097.
- 45 37. Green S, Higgins J. Cochrane handbook for systematic reviews of interventions. Version; 2005.
- 46 38. Sterne JA, Egger M, Moher DJChfsroiCbs. Addressing reporting biases. 2008: 297-333.
- 47 39. Deeks JJ, Higgins JP, Altman DGJChfsroiCbs. Analysing data and undertaking meta - analyses.  
48 2008: 243-96.

- 1 40. Baracs J, Huszar O, Sajjadi SG, Horvath OP. Surgical site infections after abdominal closure in  
2 colorectal surgery using triclosan-coated absorbable suture (PDS Plus) vs. uncoated sutures (PDS II): a  
3 randomized multicenter study. *Surgical infections* 2011; **12**(6): 483-9.
- 4 41. Chen SY, Chen TM, Dai NT, et al. Do antibacterial-coated sutures reduce wound infection in head  
5 and neck cancer reconstruction? *European journal of surgical oncology : the journal of the European*  
6 *Society of Surgical Oncology and the British Association of Surgical Oncology* 2011; **37**(4): 300-4.
- 7 42. Ford HR, Jones P, Gaines B, Reblock K, Simpkins DL. Intraoperative handling and wound healing:  
8 controlled clinical trial comparing coated VICRYL plus antibacterial suture (coated polyglactin 910 suture  
9 with triclosan) with coated VICRYL suture (coated polyglactin 910 suture). *Surgical infections* 2005; **6**(3):  
10 313-21.
- 11 43. Galal I, El-Hindawy K. Impact of using triclosan-antibacterial sutures on incidence of surgical site  
12 infection. *American journal of surgery* 2011; **202**(2): 133-8.
- 13 44. Ichida K, Noda H, Kikugawa R, et al. Effect of triclosan-coated sutures on the incidence of surgical  
14 site infection after abdominal wall closure in gastroenterological surgery: a double-blind, randomized  
15 controlled trial in a single center. *Surgery* 2018.
- 16 45. Isik I, Selimen D, Senay S, Alhan C. Efficiency of antibacterial suture material in cardiac surgery: a  
17 double-blind randomized prospective study. *The heart surgery forum* 2012; **15**(1): E40-5.
- 18 46. Justinger C, Slotta JE, Ningel S, Graber S, Kollmar O, Schilling MK. Surgical-site infection after  
19 abdominal wall closure with triclosan-impregnated polydioxanone sutures: results of a randomized  
20 clinical pathway facilitated trial (NCT00998907). *Surgery* 2013; **154**(3): 589-95.
- 21 47. Karip AB, Celik K, Aydin T, et al. Effect of Triclosan-Coated Suture and Antibiotic Prophylaxis on  
22 Infection and Recurrence after Karydakias Flap Repair for Pilonidal Disease: A Randomized Parallel-Arm  
23 Double-Blinded Clinical Trial. *Surgical infections* 2016; **17**(5): 583-8.
- 24 48. Mingmalairak C, Ungbhakorn P, Paocharoen V. Efficacy of antimicrobial coating suture coated  
25 polyglactin 910 with triclosan (Vicryl plus) compared with polyglactin 910 (Vicryl) in reduced surgical site  
26 infection of appendicitis, double blind randomized control trial, preliminary safety report. *Journal of the*  
27 *Medical Association of Thailand = Chotmaihet thangphaet* 2009; **92**(6): 770-5.
- 28 49. Rasic Z, Schwarz D, Adam VN, et al. Efficacy of antimicrobial triclosan-coated polyglactin 910  
29 (Vicryl\* Plus) suture for closure of the abdominal wall after colorectal surgery. *Collegium antropologicum*  
30 2011; **35**(2): 439-43.
- 31 50. Ruiz-Tovar J, Alonso N, Morales V, Llaverro C. Association between Triclosan-Coated Sutures for  
32 Abdominal Wall Closure and Incisional Surgical Site Infection after Open Surgery in Patients Presenting  
33 with Fecal Peritonitis: A Randomized Clinical Trial. *Surgical infections* 2015; **16**(5): 588-94.
- 34 51. Seim BE, Tonnessen T, Woldbaek PR. Triclosan-coated sutures do not reduce leg wound infections  
35 after coronary artery bypass grafting. *Interactive cardiovascular and thoracic surgery* 2012; **15**(3): 411-5.
- 36 52. Thimour-Bergstrom L, Roman-Emanuel C, Schersten H, Friberg O, Gudbjartsson T, Jeppsson A.  
37 Triclosan-coated sutures reduce surgical site infection after open vein harvesting in coronary artery  
38 bypass grafting patients: a randomized controlled trial. *European journal of cardio-thoracic surgery :*  
39 *official journal of the European Association for Cardio-thoracic Surgery* 2013; **44**(5): 931-8.
- 40 53. Turtiainen J, Saimanen EI, Makinen KT, et al. Effect of triclosan-coated sutures on the incidence of  
41 surgical wound infection after lower limb revascularization surgery: a randomized controlled trial. *World*  
42 *journal of surgery* 2012; **36**(10): 2528-34.
- 43 54. Williams N, Sweetland H, Goyal S, Ivins N, Leaper DJ. Randomized trial of antimicrobial-coated  
44 sutures to prevent surgical site infection after breast cancer surgery. *Surgical infections* 2011; **12**(6): 469-  
45 74.
- 46 55. Zhang ZT, Zhang HW, Fang XD, et al. Cosmetic outcome and surgical site infection rates of  
47 antibacterial absorbable (Polyglactin 910) suture compared to Chinese silk suture in breast cancer surgery:  
48 a randomized pilot research. *Chinese medical journal* 2011; **124**(5): 719-24.
- 49 56. Konstantelias AA, Andriakopoulou CS, Mourgela S. Triclosan-coated sutures for the prevention of  
50 surgical-site infections: a meta-analysis. *Acta chirurgica Belgica* 2017; **117**(3): 137-48.

- 1 57. Higgins JP, Altman DG, Gotzsche PC, et al. The Cochrane Collaboration's tool for assessing risk of  
2 bias in randomised trials. *Bmj* 2011; **343**: d5928.
- 3 58. Hawn MT, Richman JS, Vick CC, et al. Timing of surgical antibiotic prophylaxis and the risk of  
4 surgical site infection. 2013; **148**(7): 649-57.
- 5 59. Blam OG, Vaccaro AR, Vanichkachorn JS, et al. Risk factors for surgical site infection in the patient  
6 with spinal injury. 2003; **28**(13): 1475-80.
- 7  
8  
9  
10  
11  
12  
13  
14  
15  
16  
17  
18  
19  
20  
21  
22  
23  
24  
25  
26  
27  
28  
29  
30  
31  
32  
33  
34  
35  
36  
37  
38  
39  
40  
41  
42  
43  
44  
45  
46  
47  
48  
49  
50  
51  
52  
53  
54  
55  
56  
57  
58  
59  
60

For peer review only

| Study             | No. of participants | No. of centres | Surgery type                                               | Sutures used                                                              | SSI criteria                                                               | Duration of follow-up        | Routine prophylactic antibiotics? |
|-------------------|---------------------|----------------|------------------------------------------------------------|---------------------------------------------------------------------------|----------------------------------------------------------------------------|------------------------------|-----------------------------------|
| Baracs 2011       | 385                 | 7              | Elective colorectal surgery                                | PDS vs PDS Plus                                                           | Not stated                                                                 | 30 days                      | Yes                               |
| Chen 2011         | 241                 | 1              | Head and neck surgery                                      | Vicryl vs Vicryl Plus                                                     | Local erythema with purulent discharge, wound dehiscence, or skin necrosis | Not stated                   | Yes                               |
| Diener 2014       | 1185                | 24             | Laparotomy                                                 | PDS vs PDS Plus                                                           | CDC criteria                                                               | 30 days                      | Yes                               |
| Ford 2005         | 147                 | 1              | Paediatric general surgery                                 | Vicryl vs Vicryl Plus                                                     | Not stated                                                                 | 80 days                      | No                                |
| Galal 2011        | 450                 | 1              | All surgery                                                | Vicryl vs Vicryl Plus                                                     | CDC criteria                                                               | 30 days                      | Not stated                        |
| Ichida 2018       | 1023                | 1              | Gastroenterologic surgery                                  | Vicryl and PDS II vs Vicryl Plus and PDS Plus                             | CDC criteria                                                               | 30 days                      | Yes                               |
| Isik 2011         | 510                 | 1              | Cardiac surgery                                            | Vicryl vs Vicryl Plus                                                     | CDC criteria                                                               | 1 month                      | Not stated                        |
| Justinger 2013    | 856                 | 1              | Laparotomy                                                 | PDS II vs PDS II Plus                                                     | CDC criteria                                                               | 2 weeks                      | Yes                               |
| Karip 2016        | 106                 | 1              | Pilonidal sinus excision followed by Karydakis flap repair | Monocryl Plus vs Monocryl                                                 | Rash, fever or purulent discharge                                          | 2 weeks                      | Yes                               |
| Mattavelli 2015   | 300                 | 4              | Elective colorectal surgery                                | Vicryl and PDS vs Vicryl Plus and PDS Plus                                | CDC criteria                                                               | 30 days                      | Yes                               |
| Mingmalairak 2009 | 100                 | 1              | Appendectomy                                               | Vicryl vs Vicryl Plus                                                     | Not stated                                                                 | 30 days, 6 months and 1 year | Yes                               |
| Nakamura 2013     | 410                 | 1              | Elective colorectal surgery                                | Vicryl vs Vicryl Plus                                                     | CDC criteria                                                               | 30 days                      | Yes                               |
| Rasic 2011        | 184                 | 1              | Elective colorectal cancer surgery                         | Vicryl vs Vicryl Plus                                                     | Not stated                                                                 | To discharge                 | Yes                               |
| Renko 2017        | 1633                | 1              | Paediatric surgery                                         | Vicryl and Monocryl and PDS vs Vicryl Plus and Monocryl Plus and PDS Plus | CDC criteria                                                               | 30 days                      | In 30%                            |
| Ruiz-Tovar 2015   | 110                 | 3              | Open colorectal surgery with faecal peritonitis            | Vicryl vs Vicryl Plus                                                     | CDC criteria                                                               | 60 days                      | Yes                               |
| Seim 2012         | 328                 | 1              | CABG leg wound                                             | Vicryl vs Vicryl Plus                                                     | Positive bacterial culture and clinical judgement                          | 4 weeks                      | Yes                               |

|   |                               |      |   |                                                 |                                                            |              |         |                          |
|---|-------------------------------|------|---|-------------------------------------------------|------------------------------------------------------------|--------------|---------|--------------------------|
| 1 | Sprowson<br>2018              | 2546 | 3 | Primary THR or TKR                              | Vicryl vs Vicryl Plus                                      | CDC criteria | 30 days | Yes                      |
| 2 | Thimour-<br>Bergstrom<br>2013 | 392  | 1 | CABG (+/-AVR, MVR) with<br>saphenous vein graft | Vicryl and Monocryl vs<br>Vicryl Plus and Monocryl<br>Plus | CDC criteria | 60 days | Yes                      |
| 3 | Turtiainen<br>2012            | 276  | 3 | Non-emergency lower-limb<br>arterial surgery    | Vicryl and Monocryl vs<br>Vicryl Plus and Monocryl<br>Plus | CDC criteria | 30 days | Yes                      |
| 4 | Williams 2011                 | 150  | 1 | Mastectomy                                      | Vicryl and Monocryl vs<br>Vicryl Plus and Monocryl<br>Plus | CDC criteria | 6 weeks | If considered<br>at risk |
| 5 | Zhang 2011                    | 101  | 6 | Mastectomy                                      | Chinese silk vs Vicryl Plus                                | CDC criteria | 30 days | Not stated               |

Table 1: Study characteristics

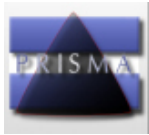

## PRISMA 2009 Flow Diagram

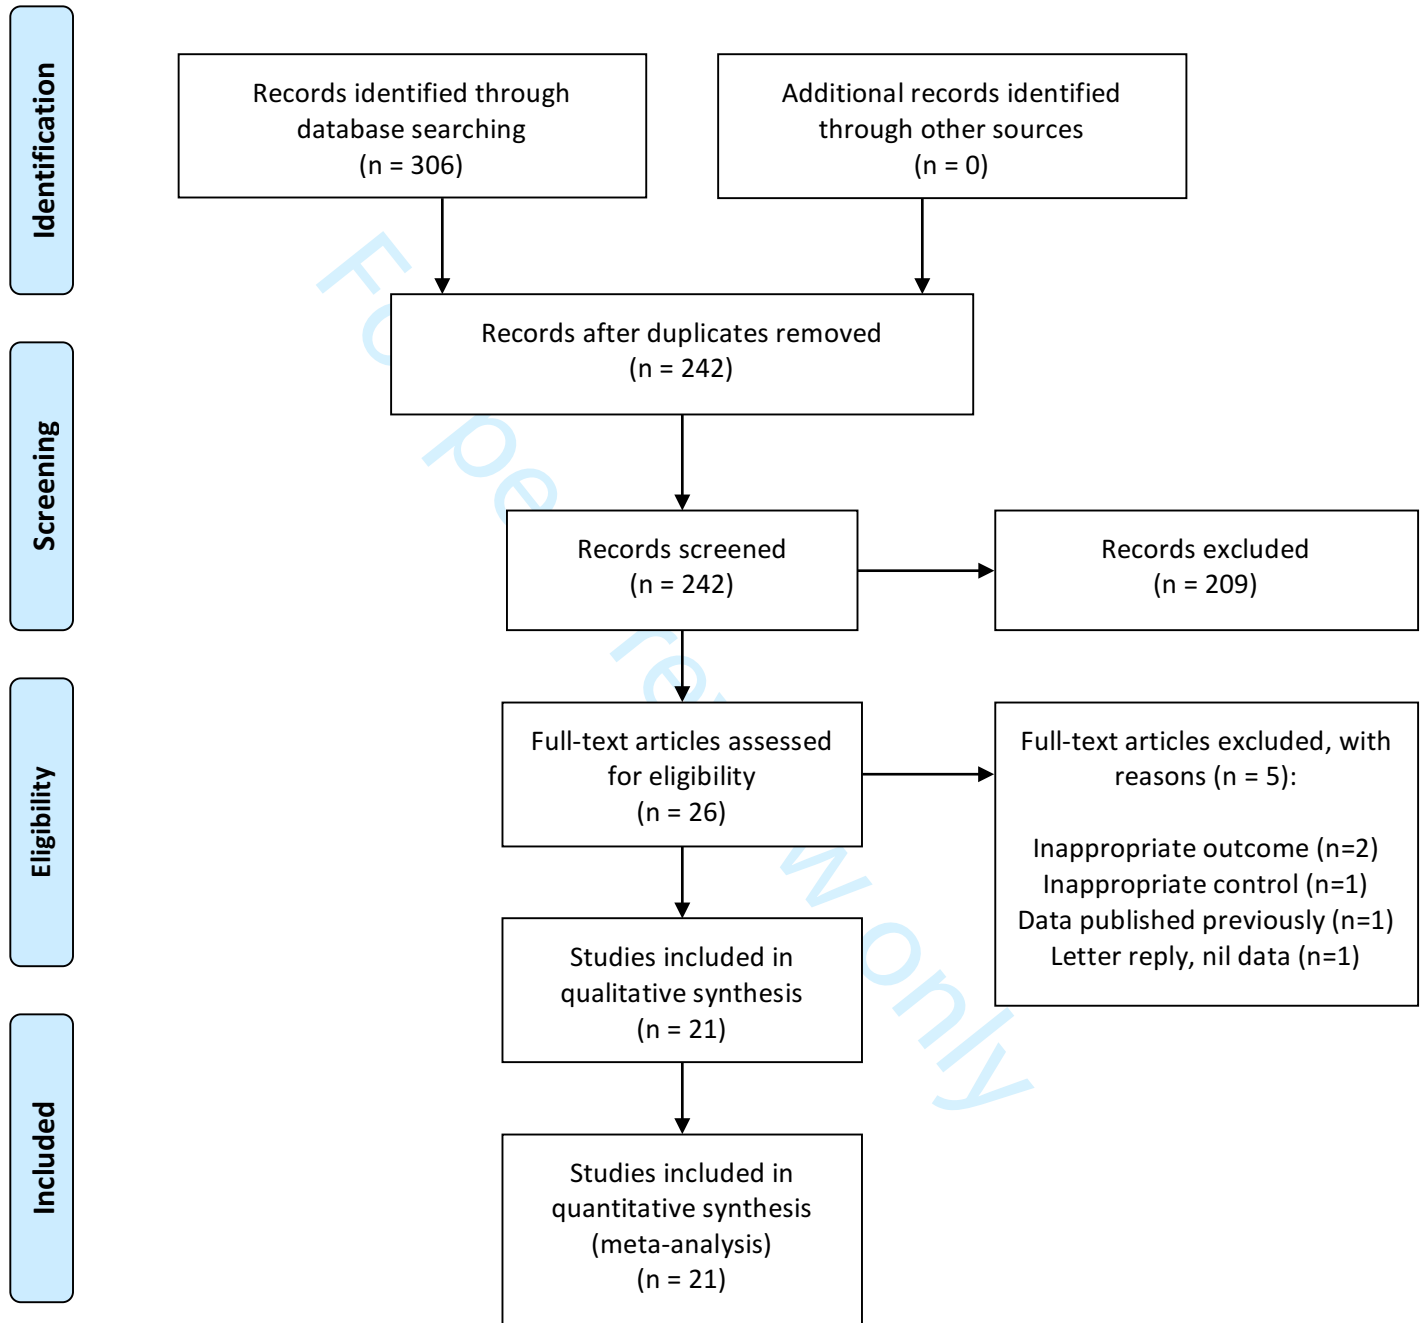

From: Moher D, Liberati A, Tetzlaff J, Altman DG, The PRISMA Group (2009). Preferred Reporting Items for Systematic Reviews and Meta-Analyses: The PRISMA Statement. PLoS Med 6(7): e1000097. doi:10.1371/journal.pmed1000097

For more information, visit [www.prisma-statement.org](http://www.prisma-statement.org).

For peer review only - <http://bmjopen.bmj.com/site/about/guidelines.xhtml>

1  
2  
3  
4  
5  
6  
7  
8  
9  
10  
11  
12  
13  
14  
15  
16  
17  
18  
19  
20  
21  
22  
23  
24  
25  
26  
27  
28  
29  
30  
31  
32  
33  
34  
35  
36  
37  
38  
39  
40  
41  
42  
43  
44  
45  
46  
47  
48  
49  
50  
51  
52  
53  
54  
55  
56  
57  
58  
59  
60

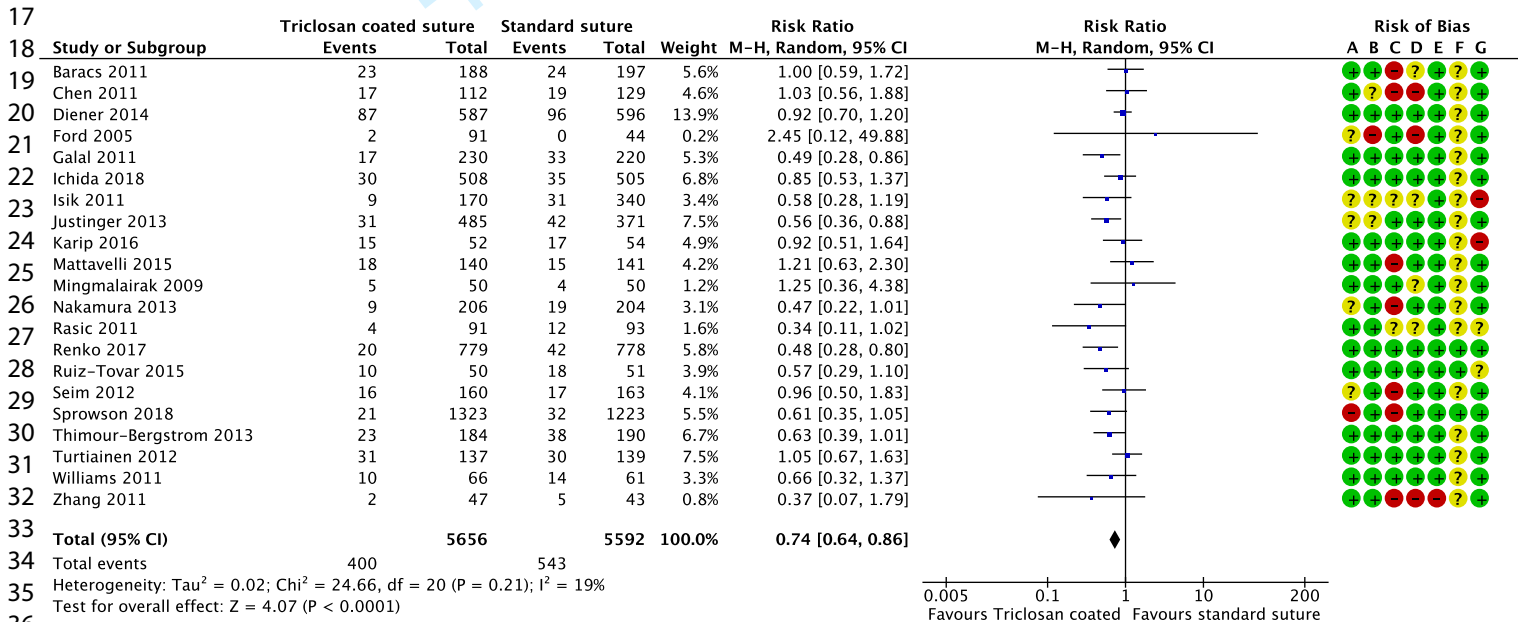

**Risk of bias legend**  
 (A) Random sequence generation (selection bias)  
 (B) Allocation concealment (selection bias)  
 (C) Blinding of participants and personnel (performance bias)  
 (D) Blinding of outcome assessment (detection bias)  
 (E) Incomplete outcome data (attrition bias)  
 (F) Selective reporting (reporting bias)  
 (G) Other bias

1  
2  
3  
4  
5  
6  
7  
8  
9  
10  
11  
12  
13  
14  
15  
16  
17  
18  
19  
20  
21  
22  
23  
24  
25  
26  
27  
28  
29  
30  
31  
32  
33  
34  
35  
36  
37  
38  
39  
40  
41  
42  
43  
44  
45  
46  
47  
48  
49  
50  
51  
52  
53  
54  
55  
56  
57  
58  
59  
60

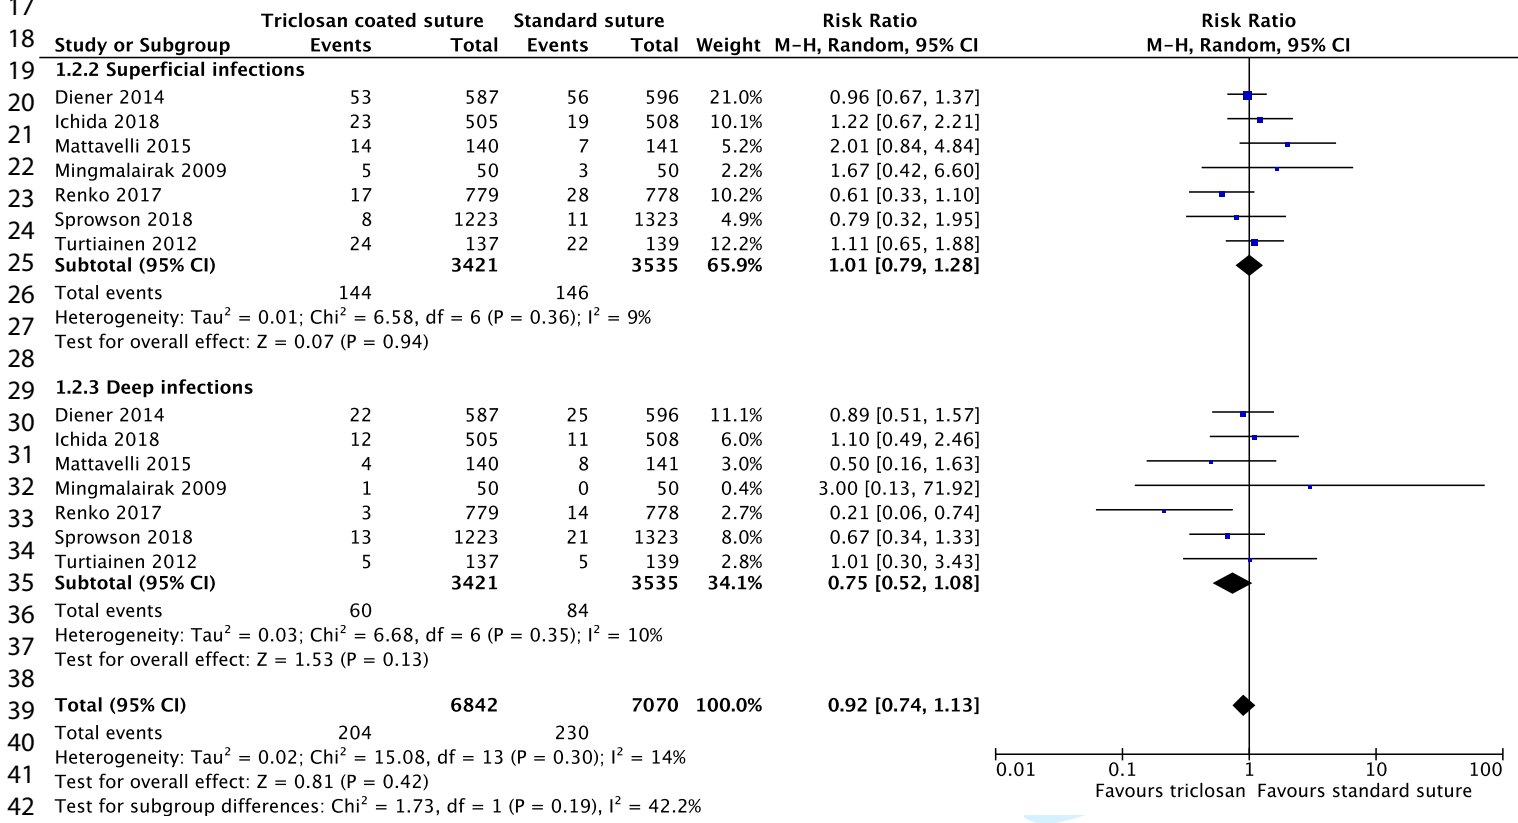



1  
2  
3  
4  
5  
6  
7  
8  
9  
10  
11  
12  
13  
14  
15  
16  
17  
18  
19  
20  
21  
22  
23  
24  
25  
26  
27  
28  
29  
30  
31  
32  
33  
34  
35  
36  
37  
38  
39  
40  
41  
42  
43  
44  
45  
46  
47  
48  
49  
50  
51  
52  
53  
54  
55  
56  
57  
58  
59  
60

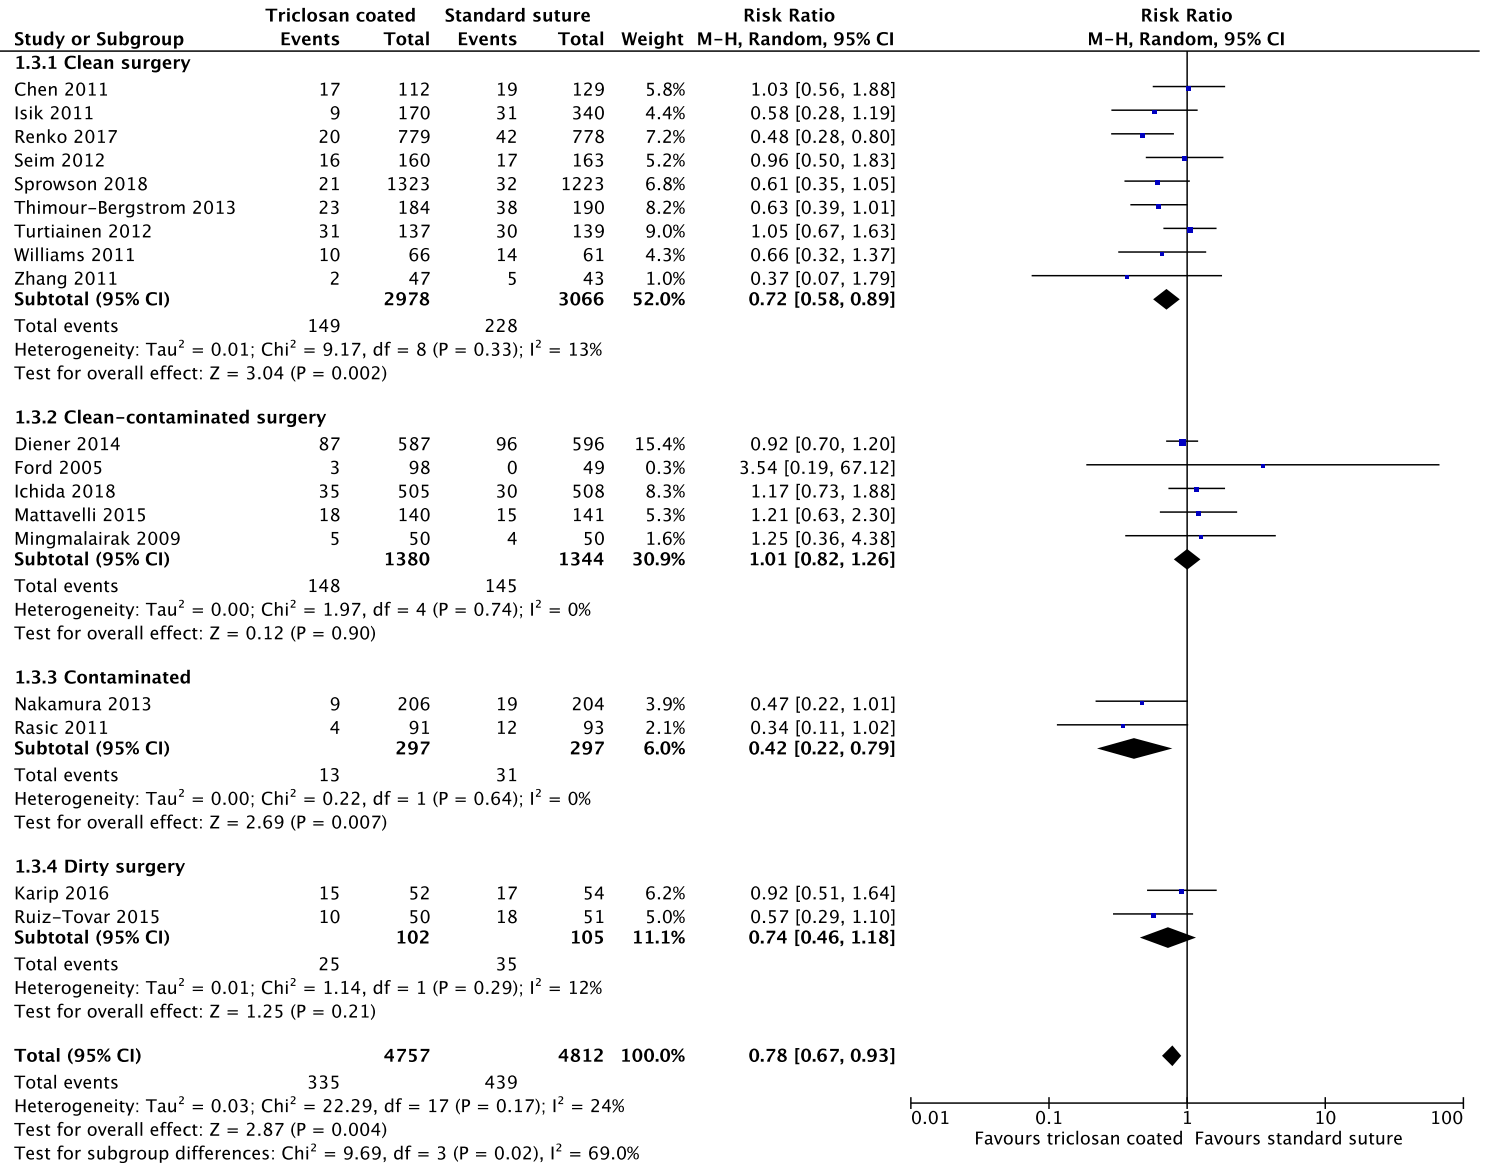

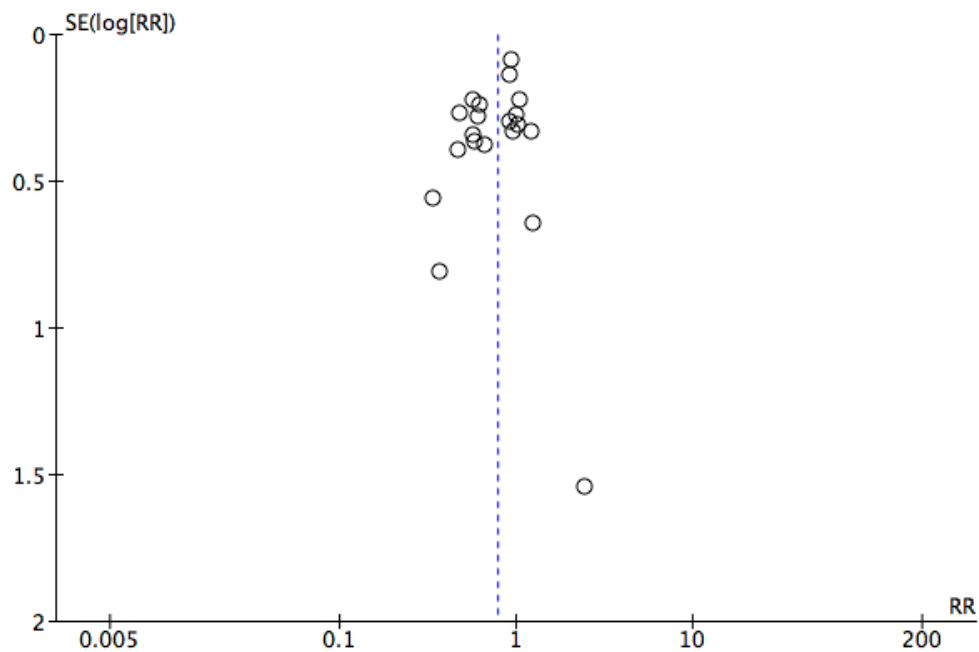

Figure 5: Funnel plot for the including studies

211x141mm (72 x 72 DPI)

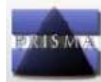

# PRISMA 2009 Checklist

1  
2  
3  
4  
5  
6  
7  
8  
9  
10  
11  
12  
13  
14  
15  
16  
17  
18  
19  
20  
21  
22  
23  
24  
25  
26  
27  
28  
29  
30  
31  
32  
33  
34  
35  
36  
37  
38  
39  
40  
41  
42  
43  
44  
45  
46  
47

| Section/topic                      | #  | Checklist item                                                                                                                                                                                                                                                                                              | Reported on page # |
|------------------------------------|----|-------------------------------------------------------------------------------------------------------------------------------------------------------------------------------------------------------------------------------------------------------------------------------------------------------------|--------------------|
| <b>TITLE</b>                       |    |                                                                                                                                                                                                                                                                                                             |                    |
| Title                              | 1  | Identify the report as a systematic review, meta-analysis, or both.                                                                                                                                                                                                                                         | 1                  |
| <b>ABSTRACT</b>                    |    |                                                                                                                                                                                                                                                                                                             |                    |
| Structured summary                 | 2  | Provide a structured summary including, as applicable: background; objectives; data sources; study eligibility criteria, participants, and interventions; study appraisal and synthesis methods; results; limitations; conclusions and implications of key findings; systematic review registration number. | 1                  |
| <b>INTRODUCTION</b>                |    |                                                                                                                                                                                                                                                                                                             |                    |
| Rationale                          | 3  | Describe the rationale for the review in the context of what is already known.                                                                                                                                                                                                                              | 3/4                |
| Objectives                         | 4  | Provide an explicit statement of questions being addressed with reference to participants, interventions, comparisons, outcomes, and study design (PICOS).                                                                                                                                                  | 5                  |
| <b>METHODS</b>                     |    |                                                                                                                                                                                                                                                                                                             |                    |
| Protocol and registration          | 5  | Indicate if a review protocol exists, if and where it can be accessed (e.g., Web address), and, if available, provide registration information including registration number.                                                                                                                               | 5                  |
| Eligibility criteria               | 6  | Specify study characteristics (e.g., PICOS, length of follow-up) and report characteristics (e.g., years considered, language, publication status) used as criteria for eligibility, giving rationale.                                                                                                      | 7 and table 1      |
| Information sources                | 7  | Describe all information sources (e.g., databases with dates of coverage, contact with study authors to identify additional studies) in the search and date last searched.                                                                                                                                  | 5                  |
| Search                             | 8  | Present full electronic search strategy for at least one database, including any limits used, such that it could be repeated.                                                                                                                                                                               | 5                  |
| Study selection                    | 9  | State the process for selecting studies (i.e., screening, eligibility, included in systematic review, and, if applicable, included in the meta-analysis).                                                                                                                                                   | 5/6/7              |
| Data collection process            | 10 | Describe method of data extraction from reports (e.g., piloted forms, independently, in duplicate) and any processes for obtaining and confirming data from investigators.                                                                                                                                  | 5/6/7              |
| Data items                         | 11 | List and define all variables for which data were sought (e.g., PICOS, funding sources) and any assumptions and simplifications made.                                                                                                                                                                       | 6                  |
| Risk of bias in individual studies | 12 | Describe methods used for assessing risk of bias of individual studies (including specification of whether this was done at the study or outcome level), and how this information is to be used in any data synthesis.                                                                                      | 6                  |
| Summary measures                   | 13 | State the principal summary measures (e.g., risk ratio, difference in means).                                                                                                                                                                                                                               | 6/7                |
| Synthesis of results               | 14 | Describe the methods of handling data and combining results of studies, if done, including measures of consistency (e.g., I <sup>2</sup> ) for each meta-analysis.                                                                                                                                          | 6/7                |

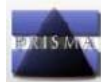

# PRISMA 2009 Checklist

Page 1 of 2

| Section/topic                 | #  | Checklist item                                                                                                                                                                                           | Reported on page # |
|-------------------------------|----|----------------------------------------------------------------------------------------------------------------------------------------------------------------------------------------------------------|--------------------|
| Risk of bias across studies   | 15 | Specify any assessment of risk of bias that may affect the cumulative evidence (e.g., publication bias, selective reporting within studies).                                                             | 6                  |
| Additional analyses           | 16 | Describe methods of additional analyses (e.g., sensitivity or subgroup analyses, meta-regression), if done, indicating which were pre-specified.                                                         | 6/7                |
| <b>RESULTS</b>                |    |                                                                                                                                                                                                          |                    |
| Study selection               | 17 | Give numbers of studies screened, assessed for eligibility, and included in the review, with reasons for exclusions at each stage, ideally with a flow diagram.                                          | 7/8                |
| Study characteristics         | 18 | For each study, present characteristics for which data were extracted (e.g., study size, PICOS, follow-up period) and provide the citations.                                                             | 7/8 table 1        |
| Risk of bias within studies   | 19 | Present data on risk of bias of each study and, if available, any outcome level assessment (see item 12).                                                                                                | Figure 2           |
| Results of individual studies | 20 | For all outcomes considered (benefits or harms), present, for each study: (a) simple summary data for each intervention group (b) effect estimates and confidence intervals, ideally with a forest plot. | Figure 2-5         |
| Synthesis of results          | 21 | Present results of each meta-analysis done, including confidence intervals and measures of consistency.                                                                                                  | Figure 2-5         |
| Risk of bias across studies   | 22 | Present results of any assessment of risk of bias across studies (see Item 15).                                                                                                                          | Figure 2           |
| Additional analysis           | 23 | Give results of additional analyses, if done (e.g., sensitivity or subgroup analyses, meta-regression [see Item 16]).                                                                                    | Figure 2-5         |
| <b>DISCUSSION</b>             |    |                                                                                                                                                                                                          |                    |
| Summary of evidence           | 24 | Summarize the main findings including the strength of evidence for each main outcome; consider their relevance to key groups (e.g., healthcare providers, users, and policy makers).                     | 9/10               |
| Limitations                   | 25 | Discuss limitations at study and outcome level (e.g., risk of bias), and at review-level (e.g., incomplete retrieval of identified research, reporting bias).                                            | 10                 |
| Conclusions                   | 26 | Provide a general interpretation of the results in the context of other evidence, and implications for future research.                                                                                  | 9/10/11            |
| <b>FUNDING</b>                |    |                                                                                                                                                                                                          |                    |
| Funding                       | 27 | Describe sources of funding for the systematic review and other support (e.g., supply of data); role of funders for the systematic review.                                                               | 1                  |

From: Moher D, Liberati A, Tetzlaff J, Altman DG, The PRISMA Group (2009). Preferred Reporting Items for Systematic Reviews and Meta-Analyses: The PRISMA Statement. PLoS Med 6(7): e1000097. doi:10.1371/journal.pmed1000097

For peer review only - <http://bmjopen.bmj.com/site/about/guidelines.xhtml>  
For more information, visit: [www.prisma-statement.org](http://www.prisma-statement.org)

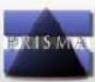

# PRISMA 2009 Checklist

- 1
- 2
- 3
- 4
- 5
- 6
- 7
- 8
- 9
- 10
- 11
- 12
- 13
- 14
- 15
- 16
- 17
- 18
- 19
- 20
- 21
- 22
- 23
- 24
- 25
- 26
- 27
- 28
- 29
- 30
- 31
- 32
- 33
- 34
- 35
- 36
- 37
- 38
- 39
- 40
- 41
- 42
- 43
- 44
- 45
- 46
- 47

For peer review only

# BMJ Open

## The use of triclosan coated sutures to prevent surgical site infections: a systematic review and meta-analysis of the literature

|                                 |                                                                                                                                                                                                                                                                                                                                                                       |
|---------------------------------|-----------------------------------------------------------------------------------------------------------------------------------------------------------------------------------------------------------------------------------------------------------------------------------------------------------------------------------------------------------------------|
| Journal:                        | <i>BMJ Open</i>                                                                                                                                                                                                                                                                                                                                                       |
| Manuscript ID                   | bmjopen-2019-029727.R1                                                                                                                                                                                                                                                                                                                                                |
| Article Type:                   | Research                                                                                                                                                                                                                                                                                                                                                              |
| Date Submitted by the Author:   | 18-Jun-2019                                                                                                                                                                                                                                                                                                                                                           |
| Complete List of Authors:       | Ahmed, Imran; University of Warwick, Clinical Trials Unit<br>Boulton, Adam; University Hospital Coventry<br>Rizvi, Sana; University Hospital Coventry<br>Carlos, William; University Hospital Coventry<br>Dickenson, Edward; University of Warwick, Warwick Medical School<br>Smith, NA; University of Warwick, Clinical Sciences Research Laboratories<br>Reed, Mike |
| <b>Primary Subject Heading</b>: | Surgery                                                                                                                                                                                                                                                                                                                                                               |
| Secondary Subject Heading:      | Infectious diseases                                                                                                                                                                                                                                                                                                                                                   |
| Keywords:                       | Surgical site infection, Triclosan, Systematic review                                                                                                                                                                                                                                                                                                                 |
|                                 |                                                                                                                                                                                                                                                                                                                                                                       |

SCHOLARONE™  
Manuscripts

# The use of triclosan coated sutures to prevent surgical site infections: a systematic review and meta-analysis of the literature

Imran Ahmed<sup>(1,2)</sup> ([imran.ahmed4@nhs.net](mailto:imran.ahmed4@nhs.net)), Adam J Boulton<sup>(1,2)</sup> ([adam.boulton@nhs.net](mailto:adam.boulton@nhs.net)), Sana Rizvi<sup>(2)</sup> ([sana.rizvi@nhs.net](mailto:sana.rizvi@nhs.net)). William J Carlos<sup>(2)</sup> ([William.carlos@nhs.net](mailto:William.carlos@nhs.net)), Edward Dickenson<sup>(1,2)</sup> ([e.j.l.dickenson@warwick.ac.uk](mailto:e.j.l.dickenson@warwick.ac.uk)), Nicholas Smith<sup>(1)</sup> ([nickasmith@doctors.net.uk](mailto:nickasmith@doctors.net.uk)), Mike Reed<sup>(4)</sup> ([mike.reed@nhs.net](mailto:mike.reed@nhs.net))

1: University of Warwick, Clinical trials Unit, Warwick Medical school, CSRL, UHCW, Coventry CV22DX, Coventry CV4 7AL

2: University Hospital Coventry and Warwickshire, Clifford Bridge Road, Coventry, CV2 2DX

3: Northumbria Healthcare NHS Foundation Trust, Northumberland, NE23 6NZ

Corresponding author

Imran Ahmed

University of Warwick, Warwick Clinical trials Unit, Warwick Medical school, Gibbett Hill Campus, Coventry CV4 7AL

[Imran.ahmed4@nhs.net](mailto:Imran.ahmed4@nhs.net)

02476968630

Orchid ID: 0000-0003-2774-9954

## ABSTRACT

### Introduction and objectives

Surgical site infections (SSIs) represent a common and serious complication of all surgical interventions. Micro-organisms are able to colonise sutures that are implanted in the skin, which is a causative factor of SSIs. Triclosan coated sutures are antibacterial sutures aimed at reducing surgical site infections. Our objective is to update the existing literature by systematically reviewing available evidence to assess the effectiveness of triclosan coated sutures in the prevention of surgical site infections.

### Methods

A systematic review of EMBASE, MEDLINE, AMED (Allied and complementary medicine database) and CENTRAL was performed to identify full text randomised controlled trials (RCTs).

### Intervention

Triclosan coated sutures versus non triclosan coated sutures.

### Primary outcome

Our primary outcome was the development of surgical site infections at 30 days post operatively. A meta-analysis was performed using a random effects model.

### Results

Twenty five RCTs were included involving 11,957 participants. Triclosan coated sutures were used in 6008 participants and non triclosan coated sutures were used in 5949. Triclosan coated sutures significantly reduced the risk of surgical site infections at 30 days (RR 0.73, 95% CI 0.65 to 0.82). . Further sensitivity analysis demonstrated that triclosan coated sutures significantly reduced the risk of surgical site infections in both clean and contaminated surgery.

### Conclusion

Triclosan coated sutures have been shown to significantly reduced the risk of surgical site infections when compared to standard sutures. This is in agreement with previous work in this area. This study represented the largest review to date in this area. This moderate quality evidence recommends the use



1 of Triclosan coated sutures in order to reduce the risk of SSIs particularly in clean and contaminated  
2  
3 surgical procedures. .  
4

5  
6 Registration

7  
8 PROSPERO (Reference: CRD42014014856).Key words

9  
10 Surgical site infection, triclosan, systematic review  
11  
12

### 13 **Article summary**

14  
15  
16 Strengths and limitations of this study

17  
18 Strengths

- 19  
20 • Systematic nature of data collection and analysis
- 21  
22 • Largest review to date in this topic area
- 23  
24 • Analyses performed comparing different classifications of surgery i.e clean, clean-contaminated,  
25  
26 contaminated and dirty.  
27

28 Limitations

- 29  
30 • Heterogenous nature of included studies. E.g. different age of participants, co-morbidities and  
31  
32 surgery type.  
33

34 Original protocol

35  
36 A protocol for this review was prospectively registered with PROSPERO (Reference: CRD42014014856).  
37

38 Funding statement

39  
40 This research received no specific grant from any funding agency in the public, commercial or not-for-  
41  
42 profit sectors  
43

44  
45 Competing interests

46  
47 All authors report no competing interests.  
48  
49

50  
51  
52  
53 Word count: 3620  
54  
55  
56  
57  
58  
59  
60

## INTRODUCTION

Surgical site infections (SSIs) represent a common complication throughout all surgical procedures<sup>1</sup>. It is estimated that SSIs account for 5% of all surgical complications<sup>2</sup> and 20% of all healthcare associated infections<sup>3,4</sup>. It is generally believed that the number of surgical procedures, particularly in elective orthopaedics<sup>5</sup>, will increase over the next decade, therefore increasing the incidence of SSIs. SSIs are associated with prolonged hospital admission<sup>6</sup> and increased morbidity and mortality<sup>7,8,9</sup>. In addition to having a significant impact on patient care and experience, SSIs also add substantial costs to healthcare providers. It is estimated that SSIs cost UK healthcare services approximately £61 million in 2012<sup>10</sup> and figures from the US highlight the extensive cost of SSIs with an estimated additional \$2300 per case<sup>11</sup>. Furthermore, Fleck *et al.* found that the mean cost of treated a SSI following sternal wound incision was \$11,200<sup>12</sup>. These are conservative estimates as active surveillance of SSIs not routinely performed<sup>6</sup>.

Due to the wide ranging deleterious effects of SSIs and their treatment, particularly in the context of increasing numbers of surgical procedures, there is a clinical need to reduce the incidence of SSIs. SSIs are multifactorial with patient factors such as age, co-morbidities including diabetes, and immunosuppression<sup>7,13-15</sup> contributing to their development, along with surgical factors. Many patient factors may not be optimised and hence research focus has been placed on surgical factors, including suture material.

SSIs may arise when bacteria colonise the suture material<sup>16</sup>, creating a biofilm as it passes through the skin<sup>17</sup>. This biofilm establishes an immunity from both antimicrobial treatment and the host immune system<sup>6,17</sup>. Once this biofilm develops there is an increased chance of a SSI developing. Research has shown bacteria may colonise monofilament and braided sutures<sup>18-20</sup>. With this in mind, considerable work has been carried out since the 1950s with regards to coating suture material with an antimicrobial, including silver<sup>21,22</sup>. Triclosan (polychlorophenoxyphenol) has been used for its antiseptic properties for

1 many years in toothpaste and soap and has an established safety profile<sup>5</sup>. Triclosan has been used to  
2  
3 successfully coat the following sutures and gained FDA (US food and drug administration) approval in  
4  
5 2002: braided polyglactan 910 (Vicryl Plus), poliglecaprone 25 (Monocryl Plus) and polydioxanone (PDS  
6  
7 Plus).  
8  
9

10  
11  
12  
13 *In vitro* and *in vivo* studies have shown the effectiveness of triclosan coated sutures<sup>23-25</sup> in killing bacteria  
14  
15 associated with SSIs and inhibiting colonisation of suture material, with one study demonstrating a 66%  
16  
17 reduction in bacterial colonisation<sup>26</sup>. Since then a large number of randomised control trials (RCTs) have  
18  
19 been performed with contrasting results of the effectiveness of triclosan coated sutures in the prevention  
20  
21 of SSIs. Subsequent meta-analyses have also produced conflicting results and hence the true effect  
22  
23 remains unclear<sup>6,7,27-32</sup>. The most recent and largest systematic review to date was performed by De Jonge  
24  
25 *et al.* and found triclosan coated sutures significantly reduced the incidence of SSIs<sup>32</sup>. This review searched  
26  
27 the literature up until November 2015 and included 6462 patients from RCTs published in peer-reviewed  
28  
29 journals as well as conference abstracts. Performing robust methodological appraisal of conference  
30  
31 abstracts is not possible, they do not permit thorough risk of bias assessments, and as they have not  
32  
33 undergone the formal journal peer-review process, they represent a potentially biased and unreliable  
34  
35 source of data. Since this review, a number of large, high quality RCTs have been produced<sup>33,34</sup>. Of note,  
36  
37 a recent RCT of 2546 patients found that triclosan coated sutures did not reduce the incidence of SSIs; a  
38  
39 finding in contrast to the previous systematic review<sup>32,34</sup>. This represents a substantial increase in the  
40  
41 number of patients available for meta-analysis since the last review. As a result, we believe it is important  
42  
43 to update the existing literature by performing a new, up to date, systematic review and meta-analysis to  
44  
45 assimilate the current evidence and inform clinical practice. A new review should include a detailed risk  
46  
47 of bias assessment and GRADE assessment of the quality of evidence.  
48  
49  
50  
51  
52  
53  
54  
55  
56  
57  
58  
59  
60

1 This new systematic review and meta-analysis of the available literature aims to determine whether the  
2  
3 use of triclosan coated sutures reduces the incidence of SSIs in comparison to standard non-coated  
4  
5 sutures.  
6  
7  
8  
9

## 10 11 **PICOS statement**

12  
13 The included population encompasses patients of any age and gender undergoing any surgical procedure  
14  
15 utilising sutures to close the wound. The intervention studied is the use of triclosan coated sutured and  
16  
17 comparison is made with non-triclosan coated sutures. The outcomes assessed are the rates of SSIs,  
18  
19 including superficial and deep SSIs. This systematic review will only include RCTs.  
20  
21  
22  
23  
24  
25  
26  
27

## 28 29 **METHODS**

30  
31 A systematic review of the available literature was conducted and is reported in accordance with the  
32  
33 Preferred Reporting Items for Systematic Reviews and Meta-Analyses (PRISMA) guidance<sup>35</sup>. A protocol for  
34  
35 this review was prospectively registered with PROSPERO (Reference: CRD42014014856).  
36  
37  
38  
39

### 40 41 **Search methods**

42  
43 Electronic searches were conducted using OVID SP on the following databases: MEDLINE(1946-March  
44  
45 Week 5 2018); Excerpta Medica Database (EMBASE) (1974 to 2018 April 10); Allied and Complementary  
46  
47 Medicine (AMED) (1985 to March 2018); and Cochrane Central Register of Controlled Trials (CENTRAL). A  
48  
49 multi-purpose search was performed for all terms and the search terms were: "Triclosan", "Anti-bacterial  
50  
51 agents", "Anti-infective agents, local", "Coated materials, biocompatible", "Biomimetic material",  
52  
53 "Sutures", "Vicryl Plus", "Monocryl Plus", "PDS Plus", "Surgical site infection", "Surgical Wound infection".  
54  
55  
56  
57 The search was conducted on 31<sup>st</sup> May 2019.  
58  
59  
60

## 1      **Selection of Studies**

2  
3      Two authors (IA and AB) independently selected studies for inclusion. Any discrepancies were resolved  
4  
5      by discussion with a third author (ED). Titles and abstracts were screened and full texts obtained for any  
6  
7      studies of interest. The eligibility criteria were formed from the PICOS statement and registered on  
8  
9      PROSPERO prior to undertaking the search. Only RCTs published in peer-reviewed journals presenting  
10  
11      new data were included.  
12  
13

## 16      **Data extraction**

17  
18      Data was independently extracted from eligible included studies onto predetermined forms by two  
19  
20      authors (IA and AB). Any discrepancies were then resolved following discussion between two authors (IA  
21  
22      and AB) and a third author. Data extracted included baseline patient characteristics, surgical procedures  
23  
24      performed, number of centres, suture material, SSI diagnostic criteria, length of follow up, routine  
25  
26      prophylactic antibiotic use and number of SSIs. Data regarding superficial of deep SSI was extracted when  
27  
28      possible. Information regarding randomisation, blinding, funding and country of origin was extracted.  
29  
30  
31

## 34      **Assessment of Risk of Bias**

35  
36      Two authors (IA and AB) independently appraised eligible studies according to the Cochrane  
37  
38      Collaboration's risk of bias tool, resolving any discrepancies with a third author (ED) as necessary<sup>36</sup>. Review  
39  
40      Manager version 5.3 (The Nordic Cochrane Centre, The Cochrane Collaboration, 2014) was used to  
41  
42      generate the summary figures. The parameters used for 'other' sources of bias included source of funding  
43  
44      and antibiotic regime.  
45  
46

47  
48      Two authors (IA and AB) independently assessed the quality of evidence. We used the GRADE  
49  
50      considerations (study limitations, consistence of effect, imprecision, indirectness and publication bias) to  
51  
52      assess the quality of the body of evidence<sup>37</sup>. Decisions to upgrade or downgrade body of evidence have  
53  
54      been clearly stated in the discussion.  
55  
56  
57  
58  
59  
60

1 Publication bias was assessed following construction of a funnel plot in order to identify the presence or  
2  
3 absence of bias of this kind.  
4  
5

## 6 **Statistical analysis**

7  
8 A fixed effects model was used to calculate the predominant relative risk (RR) and the 95% confidence  
9 intervals of the studies included. Statistically heterogeneity was first assessed using a funnel plot and  
10  
11 more formally using the  $I^2$  statistic<sup>36</sup>. Forest plots were then generated summarising the results of the  
12  
13 meta-analysis using Review Manager 5.3.  
14  
15  
16  
17

## 18 **Patient and Public Involvement**

19  
20 Given the design of this study and the retrospective nature, patient and public members were not  
21  
22 involved in the development and conduct of this review. With the aid of patient and public members we  
23  
24 will produce lay summaries of the results available for patients.  
25  
26  
27  
28

## 29 **RESULTS**

30  
31 The search revealed 357 records of possible relevance. No other sources of records were identified.  
32  
33 Removal of duplicates left 249 records to be examined. 219 records were excluded based on title and  
34  
35 abstract screening. 30 full texts were assessed for eligibility and 25 studies were included in the meta-  
36  
37 analysis (see figure 1)<sup>2,7,11,33,34,38-57</sup>.  
38  
39  
40  
41  
42

### 43 **Study characteristics**

44  
45 Study characteristics are summarised in table 1. Twenty-five RCTs were included in this review involving  
46  
47 11,957 patients<sup>2,7,11,33,34,38-57</sup>. There were 6008 patients randomised to triclosan coated sutures and 5949  
48  
49 patients to standard sutures. In studies which reported mean age, the mean age reported in 23 out of 25  
50  
51 studies was comparable between the two groups (54.8 vs 54.8). For the studies which reported gender  
52  
53 57% of the included patients were male. Eight studies were multi-centre, with the remainder single-centre  
54  
55 studies (n=17). Vicryl was compared with Vicryl Plus in twelve studies<sup>11,34,39-41,43,46-49,54,56</sup>, three studies  
56  
57 compared PDS and versus PDS Plus<sup>7,38,55</sup>, one study compared PDS II with PDS II Plus<sup>44</sup>, two study  
58  
59 compared PDS and versus PDS Plus<sup>7,38,55</sup>, one study compared PDS II with PDS II Plus<sup>44</sup>, two study  
60

1 compared Monocryl against Monocryl Plus<sup>45,57</sup>, one compared Chinese silk with Vicryl Plus<sup>53</sup>, four studies  
2  
3 compared Vicryl and Monocryl versus Vicryl Plus and Monocryl Plus<sup>33,50-52</sup>, and two studies compared  
4  
5 Vicryl and PDS versus Vicryl Plus and PDS Plus<sup>2,42</sup>.  
6  
7

8 To define SSI, the Centre for disease control (CDC) criteria were used by 18 studies<sup>2,7,11,33,34,41-44,48,50-57</sup>,  
9  
10 clinical diagnosis or wound cultures was used by three studies studies<sup>39,45,49</sup>, and four did not provide  
11  
12 explicit definitions<sup>38,40,46,47</sup>. Seventeen studies used a follow up duration of 30 days or one month or four  
13  
14 weeks<sup>2,7,11,33,34,38,41-43,46,49,51,53-57</sup>, three for six weeks<sup>48,50,52</sup>, two for two weeks<sup>44,45</sup>, one for 80 days<sup>40</sup>, one  
15  
16 until discharge<sup>47</sup>, and one study did not specify a follow-up regime<sup>39</sup>. Routine prophylactic antibodies  
17  
18 were used in 19 studies<sup>2,7,11,34,38,39,42,44-51,54-57</sup>, no prophylactic antibiotics were used in one study<sup>40</sup>, one  
19  
20 used prophylactic antibiotics in high risk patients only<sup>52</sup>, one study used prophylactic antibiotics in 30% of  
21  
22 participants<sup>33</sup>, and three did specify prophylactic antibiotic use<sup>41,43,53</sup>.  
23  
24  
25  
26  
27

### 28 **Surgical site infection**

29  
30 The risk of developing surgical site infection was significantly reduced in the triclosan group compared to  
31  
32 the standard suture group (RR 0.73, 95% CI 0.65 to 0.82). Heterogeneity was low to moderate ( $\chi^2=24.66$ ,  
33  
34  $P=0.21$ ,  $I^2=17\%$ ). There were 420 instances of SSI amongst 6008 patients in the triclosan coated suture  
35  
36 group and 581 SSIs in 5949 patients in the standard suture group. See figure 2.  
37  
38  
39

### 40 **Sub-group analysis**

41  
42 Eight studies reported superficial and deep infections separately<sup>2,7,33,34,42,46,51,57</sup>. There were 152/3507  
43  
44 cases of superficial SSI in the triclosan group and 164/3626 cases in the standard suture group, producing  
45  
46 a meta-analysis risk ratio of 0.95 (95% CI 0.72 to 1.25). The risk of developing a deep infection was lower  
47  
48 in the triclosan group when compared to the standard suture group, however this was not significant (RR  
49  
50 0.77, 95% CI 0.55 to 1.07). There were 61/3507 cases of deep infections in the triclosan group and 85/3626  
51  
52 cases in the standard suture group. See figure 3.  
53  
54  
55  
56  
57  
58  
59  
60

1 Ten studies reported the incidence of surgical site infection for clean surgery<sup>33,39,43,49-53,56,58</sup>. Triclosan  
2 coated sutures were associated with a significantly lower incidence of SSI (149/3029) when compared to  
3 standard sutures (230/1117) (RR 0.71, 95% CI 0.58 to 0.88).  
4  
5  
6

7  
8 Six studies reported clean contaminated surgery and there was no difference between the two groups  
9  
10 (160/1540 vs 156/1504) (RR 1.02, 95% CI 0.83,1.25)<sup>2,7,40,42,46,54</sup>.  
11  
12

13 Four studies reported the incidence of surgical site infections in contaminated surgery<sup>11,47,55,57</sup>. Triclosan  
14 coated sutures were associated with a significantly lower risk of SSI (22/438) when compared to standard  
15 sutures (55/443) (RR 0.43, 95% CI 0.27 to,0.7).  
16  
17  
18

19  
20 Two further studies reported the incidence of surgical site infection for dirty surgery<sup>45,48</sup>. There was no  
21 significant difference in the incidence of SSIs between the two groups of sutures (25/102 vs 35/105) (RR  
22 0.74, 95% CI 0.46 to 1.18). See figure 4.  
23  
24  
25  
26  
27  
28  
29  
30

### 31 Risk of bias

32  
33 The results of the risk of bias screening can be seen on figure 1. The majority of studies had a clear  
34 randomisation sequence generation and allocation concealment using sealed envelopes. Five out of  
35 twenty five (20%) had high risk of selection bias, either because the randomisation method was not stated  
36 or a quasirandomisation method was used. Two further studies had a risk of selection bias due to unclear  
37 allocation concealment methods. Ten out of twenty five studies (40%) had high risk of performance and  
38 detection bias due to either absence of blinding of the participants and outcome assessors or the methods  
39 of blinding were not stated. Four out of twenty five (16%) were at high risk of other bias due to source of  
40 funding. One study had differences in antibiotic regime between the two groups, with one group not  
41 receiving any antibiotic prophylaxis.  
42  
43  
44  
45  
46  
47  
48  
49  
50  
51  
52  
53  
54

55 The distribution of studies in the funnel plot was symmetrical. No evidence was found for publication bias  
56 in this analysis (figure 5).  
57  
58  
59  
60



1 Statistical heterogeneity was assessed using the  $\tau^2$  (0.02) test and the  $I^2$  (17%) test, indicating there is low  
2  
3  
4 heterogeneity between the studies included in this review based on the recommendations in the  
5  
6 Cochrane handbook.  
7

## 8 **DISCUSSION**

9  
10  
11 This large systematic review of 25 randomised clinical trials included 11,957 patients and there were 1001  
12  
13 instances of SSI. The subsequent meta-analysis supports the use of triclosan-coated sutures in reducing  
14  
15 the risk of surgical site infections. We report a significantly lower risk of SSI when triclosan coated sutures  
16  
17 were used, compared to standard sutures in RCTs. Triclosan coated sutures were used in a wide range of  
18  
19 surgeries, including both adult and paediatric patients. The use of triclosan coated sutures significantly  
20  
21 reduced the risk of SSI in meta-analyses of clean surgery and also contaminated surgery.. Further  
22  
23 subgroup analysis revealed a non-statistically significant reduction on the risk of developing deep SSIs  
24  
25 with triclosan coated sutures. Triclosan coated sutures appear to have no effect on the incidence of  
26  
27 superficial SSIs.  
28  
29

30  
31  
32 Our results support the findings of Konstantelias et al who concluded that triclosan coated sutures were  
33  
34 associated with a significantly lower risk of SSI when compared to standard sutures<sup>59</sup>. In addition, the  
35  
36 authors concluded that triclosan coated sutures significantly reduced the risk of SSI in clean, clean-  
37  
38 contaminated, and contaminated surgery; in agreement with our findings<sup>59</sup>. De Jonge et al reported a  
39  
40 meta-analysis of 21 RCTs including 6462 patients, also concluding that triclosan coated sutures  
41  
42 significantly reduced the risk of SSI compared to standard sutures<sup>32</sup>.  
43  
44  
45  
46  
47

### 48 **Quality of evidence**

49  
50  
51 Using the GRADE criteria the evidence was graded as 'moderate' quality. The reason for downgrading was  
52  
53 due to study limitations. Studies had high risk of selection bias due to unclear randomisation and  
54  
55 allocation methods. In addition studies had a high risk of performance and detection bias due to issues  
56  
57 with blinding of participants and outcome assessors. The body of evidence was not downgraded for  
58  
59 inconsistency as there was narrow point estimates and low study heterogeneity ( $I^2=17\%$ ). There were no  
60

1 issues with indirectness or imprecision as the outcome measures used are directly aligned to the outcome  
2  
3 measures of interest in this review. There were also a large number of participants included in this review  
4  
5 with satisfactory event rate numbers. Our symmetrical funnel plot indicated no risk of publication bias.  
6  
7  
8 Given the quality of the evidence we are moderately confident in the effect estimate, the true effect is  
9  
10 likely to be close to the estimate of the effect.  
11  
12  
13  
14

15 The strengths of this current review include the thorough and systematic nature of data collection. This  
16  
17 review represents the most up to date review of the literature and is the largest review of RCTs to date,  
18  
19 including 11,248 patients from 21 RCTs. A recent RCT in elective hip and knee surgery included 2546  
20  
21 participants, the largest RCT to date in this subject<sup>58</sup>. This review is the only review to include this  
22  
23 important and well-conducted study. In addition, this systematic review only included peer-reviewed  
24  
25 studies with published full texts. Previous meta-analyses have included conference abstracts which do  
26  
27 not go through the same rigorous peer-review process as full journal publications and thus represent a  
28  
29 potential danger to review quality<sup>32</sup>. Furthermore, robust quality and risk of bias assessment is not  
30  
31 possible with these abstract publications<sup>60</sup>. A further strength of this review is the detailed and systematic  
32  
33 quality assessments, along with robust Cochrane risk of bias assessments, of all included studies<sup>36,60</sup>. In  
34  
35 addition, this new review included further detailed sub group analysis based on superficial vs deep surgical  
36  
37 infections and based on type of surgery e.g. clean, clean contaminated, contaminated and dirty surgery.  
38  
39  
40  
41  
42  
43  
44  
45  
46

47 The main weakness of this review is the study population. As mentioned above the review includes  
48  
49 procedures which were classed as clean, clean- contaminated, contaminated, and dirty. These types of  
50  
51 surgery would all have a differing rates of SSI. The authors therefore performed sub-analyses of the  
52  
53 different categories of surgery. Routine antibiotic prophylaxis was used in 15 studies<sup>2,7,11,38,39,42,44-51,58</sup> with  
54  
55 a variation in the antibiotic agent used and the timing. This is a potential confounder for the frequency of  
56  
57 SSI<sup>61</sup>. A proportion of the included studies assessed patients with an underlying malignancy who may have  
58  
59  
60

1 been immunosuppressed. This influences the rate of SSI and is not accounted for in many of the included  
2  
3 studies<sup>62</sup>. Another weakness is the heterogeneity in the use of triclosan coated sutures. In some studies,  
4  
5 triclosan was used for closure of all surgical layers, whereas in other studies triclosan coated sutures were  
6  
7 only used on the superficial layers. This study heterogeneity should be noted when interpreting the meta-  
8  
9 analysis result. This review reports trials using CDC criteria for superficial site infections. It is important to  
10  
11 note that a stitch abscess does not meet the criteria for a superficial site infections. Patients may present  
12  
13 with a stitch abscess to healthcare professionals and undergo treatment. This study does not report the  
14  
15 impact of surgical site infections on stitch abscesses.  
16  
17  
18  
19  
20  
21  
22

23 Our review is the largest review of RCTs to date in terms of patient numbers and demonstrates clinical  
24  
25 effectiveness of triclosan coated sutures when compared to standard sutures when assessing SSI rate.  
26  
27 SSIs have been shown to have a significant impact on patient quality of life as well as on healthcare  
28  
29 providers in terms of resource allocation. The cost of triclosan sutures is variable, however the cost of SSI  
30  
31 to patients and healthcare providers is sizeable<sup>10-12</sup>. A robust cost-analysis has not been performed,  
32  
33 nevertheless, organisations should consider carefully whether they routinely use triclosan coated sutures  
34  
35 in light of these positive meta-analysis findings. This review also identified that triclosan coated sutures  
36  
37 significantly reduced the risk of SSIs in clean and contaminated surgery, therefore thoughtful  
38  
39 consideration should be paid to whether they are routinely used in this patient population.  
40  
41  
42  
43  
44  
45  
46  
47

## 48 **Conclusion**

49  
50 This systematic review identified 21 RCTs examining the effect of triclosan in reducing incidence of SSI,  
51  
52 compared with non-coated sutures. The subsequent meta-analysis included 11,248 patient and revealed  
53  
54 an overall a risk ratio of 0.74 (95% Cis 0.64 to 0.86) of developing SSI in favour of triclosan coated sutures,  
55  
56 thereby demonstrating a statistically significant lower risk of SSI following closure of a surgical wound  
57  
58 with triclosan coated sutures. Further analysis has demonstrated that triclosan coated sutures  
59  
60

1 significantly reduced the risk of SSIs in clean and contaminated surgery. This study is in agreement with  
2  
3 previous smaller and less robust reviews which have produced comparable results. This is the largest  
4  
5 review of RCTs in terms of patient numbers to demonstrate the clinical effectiveness of triclosan coated  
6  
7 sutures. Further detailed cost effectiveness is required to assess the economic benefit of implementing  
8  
9 the use of these sutures. The evidence considered in this review suggests that triclosan coated sutures  
10  
11 are effective in reducing surgical site infections, the use should in particular be considered in clean and  
12  
13 contaminated surgery.  
14  
15  
16  
17  
18  
19

## 20 Acknowledgements

21  
22 The authors would like to acknowledge Andrew Sprowson who died unexpectedly on 13 March 2015.  
23  
24 Andrew played a key role in conceiving the idea for this review and provided the early supervision to  
25  
26 ensure this review took place successfully. Andrew was an academic orthopaedic surgeon who was  
27  
28 dedicated to improving evidence-based care in his field. He was an exceptional researcher, surgeon,  
29  
30 colleague and friend greatly missed by all of us.  
31  
32  
33  
34

## 35 Funding

36  
37 This research received no specific grant from any funding agency in the public, commercial or not-for-  
38  
39 profit sectors  
40

## 41 Competing interests

42  
43 The authors report no competing interests for this study  
44

## 45 Ethical Approval

46  
47 No ethical approval required for this study.  
48

## 49 Data Statement

50  
51 Raw data is available on request by email to the corresponding author.  
52

## 53 Author contributions

54  
55 All authors contributed to the production of this manuscript and meet the ICMJE criteria.  
56  
57  
58  
59  
60

- 1 • IA: Conception of review, data collection, analysis, drafted final manuscript
- 2
- 3 • AB: Data collection, analysis, drafted final manuscript
- 4
- 5
- 6 • SR: Data analysis and revised final manuscript
- 7
- 8 • WC: Data analysis and revised final manuscript
- 9
- 10
- 11 • ED: Data collection and revision of final manuscript
- 12
- 13 • NS: Revision of final manuscript
- 14
- 15
- 16 • MR: Conception of idea and revision of final manuscript
- 17
- 18
- 19
- 20
- 21
- 22
- 23
- 24
- 25
- 26
- 27
- 28
- 29
- 30
- 31
- 32
- 33
- 34
- 35
- 36
- 37
- 38
- 39
- 40
- 41
- 42
- 43
- 44
- 45
- 46
- 47
- 48
- 49
- 50
- 51
- 52
- 53
- 54
- 55
- 56
- 57
- 58
- 59
- 60

For peer review only

1  
2  
3  
4  
5  
6  
7  
8  
9  
10  
11  
12  
13  
14  
15  
16  
17  
18  
19  
20  
21  
22  
23  
24  
25  
26  
27  
28  
29  
30  
31  
32  
33  
34  
35  
36  
37  
38  
39  
40  
41  
42  
43  
44  
45  
46  
47  
48  
49  
50  
51  
52  
53  
54  
55  
56  
57  
58  
59  
60  

## REFERENCES

1. Magill SS, Edwards JR, Bamberg W, et al. Multistate Point-Prevalence Survey of Health Care-Associated Infections. *The New England journal of medicine* 2014; **370**(13): 1198-208.
2. Mattavelli I, Rebori P, Doglietto G, et al. Multi-Center Randomized Controlled Trial on the Effect of Triclosan-Coated Sutures on Surgical Site Infection after Colorectal Surgery. *Surgical infections* 2015; **16**(3): 226-35.
3. Leaper DJ. Surgical-site infection. *The British journal of surgery* 2010; **97**(11): 1601-2.
4. Hranjec T, Swenson BR, Sawyer RG. Surgical site infection prevention: how we do it. *Surgical infections* 2010; **11**(3): 289-94.
5. Kurtz S, Ong K, Lau E, Mowat F, Halpern M. Projections of primary and revision hip and knee arthroplasty in the United States from 2005 to 2030. *The Journal of bone and joint surgery American volume* 2007; **89**(4): 780-5.
6. Chang WK, Srinivasa S, Morton R, Hill AG. Triclosan-impregnated sutures to decrease surgical site infections: systematic review and meta-analysis of randomized trials. *Annals of surgery* 2012; **255**(5): 854-9.
7. Diener MK, Knebel P, Kieser M, et al. Effectiveness of triclosan-coated PDS Plus versus uncoated PDS II sutures for prevention of surgical site infection after abdominal wall closure: the randomised controlled PROUD trial. *Lancet (London, England)* 2014; **384**(9938): 142-52.
8. de Lissovoy G, Fraeman K, Hutchins V, Murphy D, Song D, Vaughn BB. Surgical site infection: incidence and impact on hospital utilization and treatment costs. *American journal of infection control* 2009; **37**(5): 387-97.
9. Kirkland KB, Briggs JP, Trivette SL, Wilkinson WE, Sexton DJ. The impact of surgical-site infections in the 1990s: attributable mortality, excess length of hospitalization, and extra costs. *Infection control and hospital epidemiology* 1999; **20**(11): 725-30.
10. Namba RS, Inacio MC, Paxton EW. Risk factors associated with surgical site infection in 30,491 primary total hip replacements. *The Journal of bone and joint surgery British volume* 2012; **94**(10): 1330-8.
11. Nakamura T, Kashimura N, Noji T, et al. Triclosan-coated sutures reduce the incidence of wound infections and the costs after colorectal surgery: a randomized controlled trial. *Surgery* 2013; **153**(4): 576-83.
12. Fleck T, Moidl R, Blacky A, et al. Triclosan-coated sutures for the reduction of sternal wound infections: economic considerations. *The Annals of thoracic surgery* 2007; **84**(1): 232-6.
13. Neumayer L, Hosokawa P, Itani K, El-Tamer M, Henderson WG, Khuri SF. Multivariable predictors of postoperative surgical site infection after general and vascular surgery: results from the patient safety in surgery study. *Journal of the American College of Surgeons* 2007; **204**(6): 1178-87.
14. Malone DL, Genuit T, Tracy JK, Gannon C, Napolitano LM. Surgical site infections: reanalysis of risk factors. *The Journal of surgical research* 2002; **103**(1): 89-95.
15. Cheadle WG. Risk factors for surgical site infection. *Surgical infections* 2006; **7** Suppl 1: S7-11.
16. Katz S, Izhar M, Mirelman D. Bacterial adherence to surgical sutures. A possible factor in suture induced infection. *Annals of surgery* 1981; **194**(1): 35-41.
17. Gristina AG, Price JL, Hobgood CD, Webb LX, Costerton JW. Bacterial colonization of percutaneous sutures. *Surgery* 1985; **98**(1): 12-9.
18. Kathju S, Nistico L, Hall-Stoodley L, Post JC, Ehrlich GD, Stoodley P. Chronic surgical site infection due to suture-associated polymicrobial biofilm. *Surgical infections* 2009; **10**(5): 457-61.
19. Kathju S, Nistico L, Lasko LA, Stoodley P. Bacterial biofilm on monofilament suture and porcine xenograft after inguinal herniorrhaphy. *FEMS immunology and medical microbiology* 2010; **59**(3): 405-9.
20. Kathju S, Nistico L, Tower I, Lasko LA, Stoodley P. Bacterial biofilms on implanted suture material are a cause of surgical site infection. *Surgical infections* 2014; **15**(5): 592-600.

- 1 21. Darouiche RO, Meade R, Mansouri M, Raad, II. In vivo efficacy of antimicrobial-coated fabric from  
2 prosthetic heart valve sewing rings. *The Journal of heart valve disease* 1998; **7**(6): 639-46.
- 3 22. Blaker JJ, Nazhat SN, Boccaccini AR. Development and characterisation of silver-doped bioactive  
4 glass-coated sutures for tissue engineering and wound healing applications. *Biomaterials* 2004; **25**(7-8):  
5 1319-29.
- 6 23. Storch ML, Rothenburger SJ, Jacinto G. Experimental efficacy study of coated VICRYL plus  
7 antibacterial suture in guinea pigs challenged with *Staphylococcus aureus*. *Surgical infections* 2004; **5**(3):  
8 281-8.
- 9 24. Ming X, Rothenburger S, Nichols MM. In vivo and in vitro antibacterial efficacy of PDS plus  
10 (polidioxanone with triclosan) suture. *Surgical infections* 2008; **9**(4): 451-7.
- 11 25. Rothenburger S, Spangler D, Bhende S, Burkley D. In vitro antimicrobial evaluation of Coated  
12 VICRYL\* Plus Antibacterial Suture (coated polyglactin 910 with triclosan) using zone of inhibition assays.  
13 *Surgical infections* 2002; **3 Suppl 1**: S79-87.
- 14 26. Marco F, Vallez R, Gonzalez P, Ortega L, de la Lama J, Lopez-Duran L. Study of the efficacy of coated  
15 Vicryl plus antibacterial suture in an animal model of orthopedic surgery. *Surgical infections* 2007; **8**(3):  
16 359-65.
- 17 27. Wang ZX, Jiang CP, Cao Y, Ding YT. Systematic review and meta-analysis of triclosan-coated sutures  
18 for the prevention of surgical-site infection. *The British journal of surgery* 2013; **100**(4): 465-73.
- 19 28. Edmiston CE, Jr., Daoud FC, Leaper D. Is there an evidence-based argument for embracing an  
20 antimicrobial (triclosan)-coated suture technology to reduce the risk for surgical-site infections?: A meta-  
21 analysis. *Surgery* 2013; **154**(1): 89-100.
- 22 29. Sajid MS, Craciunas L, Sains P, Singh K, Baig M. Use of antibacterial sutures for skin closure in  
23 controlling surgical site infections: a systematic review of published randomized, controlled trials.  
24 *Gastroenterol Rep (Oxf)*; 2013: 42-50.
- 25 30. Daoud FC, Edmiston CE, Leaper D. Meta-Analysis of Prevention of Surgical Site Infections following  
26 Incision Closure with Triclosan-Coated Sutures: Robustness to New Evidence. *Surgical infections*; 2014:  
27 165-81.
- 28 31. Guo J, Pan LH, Li YX, et al. Efficacy of triclosan-coated sutures for reducing risk of surgical site  
29 infection in adults: a meta-analysis of randomized clinical trials. *The Journal of surgical research* 2016;  
30 **201**(1): 105-17.
- 31 32. de Jonge SW, Atema JJ, Solomkin JS, Boermeester MA. Meta-analysis and trial sequential analysis  
32 of triclosan-coated sutures for the prevention of surgical-site infection. *The British journal of surgery* 2017;  
33 **104**(2): e118-e33.
- 34 33. Renko M, Paalanne N, Tapiainen T, et al. Triclosan-containing sutures versus ordinary sutures for  
35 reducing surgical site infections in children: a double-blind, randomised controlled trial. *The Lancet*  
36 *Infectious diseases* 2017; **17**(1): 50-7.
- 37 34. Sprowson AP, Jensen C, Parsons N, et al. The effect of triclosan-coated sutures on the rate of  
38 surgical site infection after hip and knee arthroplasty: a double-blind randomized controlled trial of 2546  
39 patients. *The bone & joint journal* 2018; **100-b**(3): 296-302.
- 40 35. Moher D, Liberati A, Tetzlaff J, Altman DG. Preferred reporting items for systematic reviews and  
41 meta-analyses: the PRISMA statement. *PLoS medicine* 2009; **6**(7): e1000097.
- 42 36. Green S, Higgins J. Cochrane handbook for systematic reviews of interventions. Version; 2005.
- 43 37. Guyatt GH, Oxman AD, Vist GE, et al. GRADE: an emerging consensus on rating quality of evidence  
44 and strength of recommendations. *BMJ* 2008; **336**(7650): 924-6.
- 45 38. Baracs J, Huszar O, Sajjadi SG, Horvath OP. Surgical site infections after abdominal closure in  
46 colorectal surgery using triclosan-coated absorbable suture (PDS Plus) vs. uncoated sutures (PDS II): a  
47 randomized multicenter study. *Surgical infections* 2011; **12**(6): 483-9.
- 48 39. Chen SY, Chen TM, Dai NT, et al. Do antibacterial-coated sutures reduce wound infection in head  
49 and neck cancer reconstruction? *European journal of surgical oncology : the journal of the European*  
50 *Society of Surgical Oncology and the British Association of Surgical Oncology* 2011; **37**(4): 300-4.

- 1 40. Ford HR, Jones P, Gaines B, Reblock K, Simpkins DL. Intraoperative handling and wound healing:  
2 controlled clinical trial comparing coated VICRYL plus antibacterial suture (coated polyglactin 910 suture  
3 with triclosan) with coated VICRYL suture (coated polyglactin 910 suture). *Surgical infections* 2005; **6**(3):  
4 313-21.
- 5 41. Galal I, El-Hindawy K. Impact of using triclosan-antibacterial sutures on incidence of surgical site  
6 infection. *American journal of surgery* 2011; **202**(2): 133-8.
- 7 42. Ichida K, Noda H, Kikugawa R, et al. Effect of triclosan-coated sutures on the incidence of surgical  
8 site infection after abdominal wall closure in gastroenterological surgery: a double-blind, randomized  
9 controlled trial in a single center. *Surgery* 2018.
- 10 43. Isik I, Selimen D, Senay S, Alhan C. Efficiency of antibacterial suture material in cardiac surgery: a  
11 double-blind randomized prospective study. *The heart surgery forum* 2012; **15**(1): E40-5.
- 12 44. Justinger C, Slotta JE, Ningel S, Graber S, Kollmar O, Schilling MK. Surgical-site infection after  
13 abdominal wall closure with triclosan-impregnated polydioxanone sutures: results of a randomized  
14 clinical pathway facilitated trial (NCT00998907). *Surgery* 2013; **154**(3): 589-95.
- 15 45. Karip AB, Celik K, Aydin T, et al. Effect of Triclosan-Coated Suture and Antibiotic Prophylaxis on  
16 Infection and Recurrence after Karydakis Flap Repair for Pilonidal Disease: A Randomized Parallel-Arm  
17 Double-Blinded Clinical Trial. *Surgical infections* 2016; **17**(5): 583-8.
- 18 46. Mingmalairak C, Ungbhakorn P, Paocharoen V. Efficacy of antimicrobial coating suture coated  
19 polyglactin 910 with triclosan (Vicryl plus) compared with polyglactin 910 (Vicryl) in reduced surgical site  
20 infection of appendicitis, double blind randomized control trial, preliminary safety report. *Journal of the  
21 Medical Association of Thailand = Chotmaihet thangphaet* 2009; **92**(6): 770-5.
- 22 47. Rasic Z, Schwarz D, Adam VN, et al. Efficacy of antimicrobial triclosan-coated polyglactin 910  
23 (Vicryl\* Plus) suture for closure of the abdominal wall after colorectal surgery. *Collegium antropologicum*  
24 2011; **35**(2): 439-43.
- 25 48. Ruiz-Tovar J, Alonso N, Morales V, Llaveró C. Association between Triclosan-Coated Sutures for  
26 Abdominal Wall Closure and Incisional Surgical Site Infection after Open Surgery in Patients Presenting  
27 with Fecal Peritonitis: A Randomized Clinical Trial. *Surgical infections* 2015; **16**(5): 588-94.
- 28 49. Seim BE, Tonnessen T, Woldbaek PR. Triclosan-coated sutures do not reduce leg wound infections  
29 after coronary artery bypass grafting. *Interactive cardiovascular and thoracic surgery* 2012; **15**(3): 411-5.
- 30 50. Thimour-Bergstrom L, Roman-Emanuel C, Schersten H, Friberg O, Gudbjartsson T, Jeppsson A.  
31 Triclosan-coated sutures reduce surgical site infection after open vein harvesting in coronary artery  
32 bypass grafting patients: a randomized controlled trial. *European journal of cardio-thoracic surgery :  
33 official journal of the European Association for Cardio-thoracic Surgery* 2013; **44**(5): 931-8.
- 34 51. Turtiainen J, Saimanen EI, Makinen KT, et al. Effect of triclosan-coated sutures on the incidence of  
35 surgical wound infection after lower limb revascularization surgery: a randomized controlled trial. *World  
36 journal of surgery* 2012; **36**(10): 2528-34.
- 37 52. Williams N, Sweetland H, Goyal S, Ivins N, Leaper DJ. Randomized trial of antimicrobial-coated  
38 sutures to prevent surgical site infection after breast cancer surgery. *Surgical infections* 2011; **12**(6): 469-  
39 74.
- 40 53. Zhang ZT, Zhang HW, Fang XD, et al. Cosmetic outcome and surgical site infection rates of  
41 antibacterial absorbable (Polyglactin 910) suture compared to Chinese silk suture in breast cancer surgery:  
42 a randomized pilot research. *Chinese medical journal* 2011; **124**(5): 719-24.
- 43 54. Tabrizi R, Mohajerani H, Bozorgmehr F. Polyglactin 910 suture compared with polyglactin 910  
44 coated with triclosan in dental implant surgery: randomized clinical trial. *International Journal of Oral and  
45 Maxillofacial Surgery* 2019.
- 46 55. Roy PK, Kalita P, Lahlhenmawia H, et al. Comparison of surgical site infection rate between  
47 antibacterial coated surgical suture and conventional suture: A randomized controlled single centre study  
48 for preventive measure of postoperative infection. *International Journal of Pharmaceutical Sciences and  
49 Research* 2019; **10**(5): 2385-91.
- 50  
51  
52  
53  
54  
55  
56  
57  
58  
59  
60



- 1 56. Lin SJ, Chang FC, Huang TW, Peng KT, Shih HN, Lee MS. Temporal Change of Interleukin-6, C-  
2 Reactive Protein, and Skin Temperature after Total Knee Arthroplasty Using Triclosan-Coated Sutures.  
3 *BioMed Research International* 2018; **2018**: 9136208.
- 4 57. Arslan NC, Atasoy G, Altintas T, Terzi C. Effect of triclosan-coated sutures on surgical site infections  
5 in pilonidal disease: prospective randomized study. *International Journal of Colorectal Disease* 2018;  
6 **33**(10): 1445-52.
- 7 58. Sprowson AP, Jensen C, Parsons N, et al. The effect of triclosan-coated sutures on the rate of  
8 surgical site infection after hip and knee arthroplasty: a double-blind randomized controlled trial of 2546  
9 patients. *Bone & Joint Journal* 2018; **100-B**(3): 296-302.
- 10 59. Konstantelias AA, Andriakopoulou CS, Mourgela S. Triclosan-coated sutures for the prevention of  
11 surgical-site infections: a meta-analysis. *Acta chirurgica Belgica* 2017; **117**(3): 137-48.
- 12 60. Higgins JP, Altman DG, Gotzsche PC, et al. The Cochrane Collaboration's tool for assessing risk of  
13 bias in randomised trials. *Bmj* 2011; **343**: d5928.
- 14 61. Hawn MT, Richman JS, Vick CC, et al. Timing of surgical antibiotic prophylaxis and the risk of  
15 surgical site infection. *JAMA surgery* 2013; **148**(7): 649-57.
- 16 62. Blam OG, Vaccaro AR, Vanichkachorn JS, et al. Risk factors for surgical site infection in the patient  
17 with spinal injury. *Spine (Phila Pa 1976)* 2003; **28**(13): 1475-80.
- 18  
19  
20  
21  
22  
23  
24  
25  
26  
27  
28  
29  
30  
31  
32  
33  
34  
35  
36  
37  
38  
39  
40  
41  
42  
43  
44  
45  
46  
47  
48  
49  
50  
51  
52  
53  
54  
55  
56  
57  
58  
59  
60

1  
2  
3  
4  
5  
6  
7  
8  
9  
10  
11  
12  
13  
14  
15  
16  
17  
18  
19  
20  
21  
22  
23  
24  
25  
26  
27  
28  
29  
30  
31  
32  
33  
34  
35  
36  
37  
38  
39  
40  
41  
42  
43  
44  
45  
46  
47  
48  
49  
50  
51  
52  
53  
54  
55  
56  
57  
58  
59  
60

For peer review only

| Study             | No. of participants | No. of centres | Surgery type                                               | Sutures used                                                              | SSI criteria                                                               | Duration of follow-up        | Routine prophylactic antibiotics? |
|-------------------|---------------------|----------------|------------------------------------------------------------|---------------------------------------------------------------------------|----------------------------------------------------------------------------|------------------------------|-----------------------------------|
| Arslan 2018       | 177                 | 1              | Surgery for pilonidal disease                              | Vicryl vs Vicryl plus                                                     | CDC criteria                                                               | 30 days                      | Yes                               |
| Baracs 2011       | 385                 | 7              | Elective colorectal surgery                                | PDS vs PDS Plus                                                           | Not stated                                                                 | 30 days                      | Yes                               |
| Chen 2011         | 241                 | 1              | Head and neck surgery                                      | Vicryl vs Vicryl Plus                                                     | Local erythema with purulent discharge, wound dehiscence, or skin necrosis | Not stated                   | Yes                               |
| Diener 2014       | 1185                | 24             | Laparotomy                                                 | PDS vs PDS Plus                                                           | CDC criteria                                                               | 30 days                      | Yes                               |
| Ford 2005         | 147                 | 1              | Paediatric general surgery                                 | Vicryl vs Vicryl Plus                                                     | Not stated                                                                 | 80 days                      | No                                |
| Galal 2011        | 450                 | 1              | All surgery                                                | Vicryl vs Vicryl Plus                                                     | CDC criteria                                                               | 30 days                      | Not stated                        |
| Ichida 2018       | 1023                | 1              | Gastroenterologic surgery                                  | Vicryl and PDS II vs Vicryl Plus and PDS Plus                             | CDC criteria                                                               | 30 days                      | Yes                               |
| Isik 2011         | 510                 | 1              | Cardiac surgery                                            | Vicryl vs Vicryl Plus                                                     | CDC criteria                                                               | 1 month                      | Not stated                        |
| Justinger 2013    | 856                 | 1              | Laparotomy                                                 | PDS II vs PDS II Plus                                                     | CDC criteria                                                               | 2 weeks                      | Yes                               |
| Karip 2016        | 106                 | 1              | Pilonidal sinus excision followed by Karydakis flap repair | Monocryl Plus vs Monocryl                                                 | Rash, fever or purulent discharge                                          | 2 weeks                      | Yes                               |
| Lin 2018          | 102                 | 1              | Total knee replacement surgery                             | Vicryl vs Vicryl plus                                                     | CDC criteria                                                               | 30 days                      | Yes                               |
| Mattavelli 2015   | 300                 | 4              | Elective colorectal surgery                                | Vicryl and PDS vs Vicryl Plus and PDS Plus                                | CDC criteria                                                               | 30 days                      | Yes                               |
| Mingmalairak 2009 | 100                 | 1              | Appendectomy                                               | Vicryl vs Vicryl Plus                                                     | Not stated                                                                 | 30 days, 6 months and 1 year | Yes                               |
| Nakamura 2013     | 410                 | 1              | Elective colorectal surgery                                | Vicryl vs Vicryl Plus                                                     | CDC criteria                                                               | 30 days                      | Yes                               |
| Rasic 2011        | 184                 | 1              | Elective colorectal cancer surgery                         | Vicryl vs Vicryl Plus                                                     | Not stated                                                                 | To discharge                 | Yes                               |
| Renko 2017        | 1633                | 1              | Paediatric surgery                                         | Vicryl and Monocryl and PDS vs Vicryl Plus and Monocryl Plus and PDS Plus | CDC criteria                                                               | 30 days                      | In 30%                            |
| Roy 2019          | 110                 | 1              | Gastrointestinal surgery                                   | PDS vs PDS plus                                                           | CDC criteria                                                               | 30 days                      | Yes                               |

|                               |      |   |                                                    |                                                            |                                                         |         |                          |
|-------------------------------|------|---|----------------------------------------------------|------------------------------------------------------------|---------------------------------------------------------|---------|--------------------------|
| Ruiz-Tovar<br>2015            | 110  | 3 | Open colorectal surgery<br>with faecal peritonitis | Vicryl vs Vicryl Plus                                      | CDC criteria                                            | 60 days | Yes                      |
| Seim 2012                     | 328  | 1 | CABG leg wound                                     | Vicryl vs Vicryl Plus                                      | Positive bacterial<br>culture and clinical<br>judgement | 4 weeks | Yes                      |
| Sprowson<br>2018              | 2546 | 3 | Primary THR or TKR                                 | Vicryl vs Vicryl Plus                                      | CDC criteria                                            | 30 days | Yes                      |
| Tabrizi 2018                  | 320  | 2 | Dental implant surgery                             | Vicryl vs Vicryl plus                                      | CDC criteria                                            | 30 days | Yes                      |
| Thimour-<br>Bergstrom<br>2013 | 392  | 1 | CABG (+/-AVR, MVR) with<br>saphenous vein graft    | Vicryl and Monocryl vs<br>Vicryl Plus and Monocryl<br>Plus | CDC criteria                                            | 60 days | Yes                      |
| Turtiainen<br>2012            | 276  | 3 | Non-emergency lower-limb<br>arterial surgery       | Vicryl and Monocryl vs<br>Vicryl Plus and Monocryl<br>Plus | CDC criteria                                            | 30 days | Yes                      |
| Williams 2011                 | 150  | 1 | Mastectomy                                         | Vicryl and Monocryl vs<br>Vicryl Plus and Monocryl<br>Plus | CDC criteria                                            | 6 weeks | If considered<br>at risk |
| Zhang 2011                    | 101  | 6 | Mastectomy                                         | Chinese silk vs Vicryl Plus                                | CDC criteria                                            | 30 days | Not stated               |

Table 1: Study characteristics

1  
2  
3  
4  
5  
6  
7  
8  
9  
10  
11  
12  
13  
14  
15  
16  
17  
18  
19  
20  
21  
22  
23  
24  
25  
26  
27  
28  
29  
30  
31  
32  
33  
34  
35  
36  
37  
38  
39  
40  
41  
42  
43  
44  
45  
46  
47  
48  
49  
50  
51  
52  
53  
54  
55  
56  
57  
58  
59  
60

For peer review only

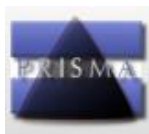

**Figure 1: PRISMA flow diagram of search results**

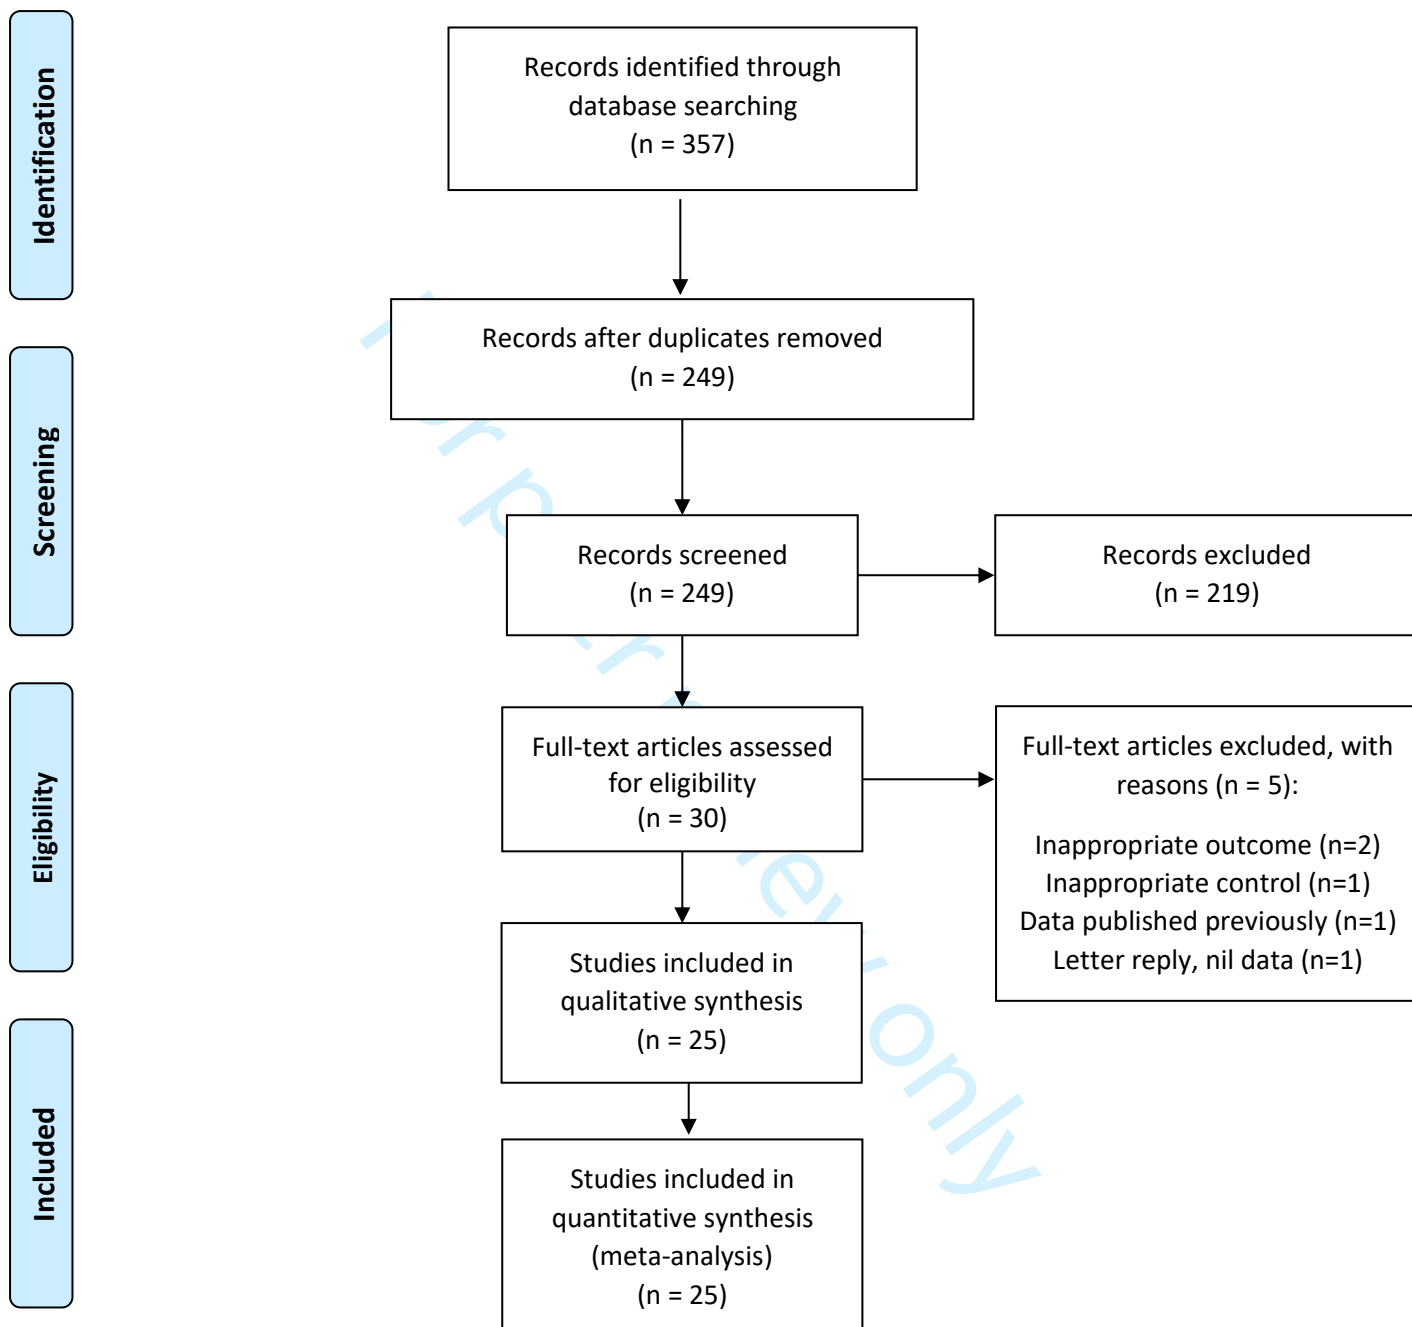

1  
2  
3  
4  
5  
6  
7  
8  
9  
10  
11  
12  
13  
14  
15  
16  
17  
18  
19  
20  
21  
22  
23  
24  
25  
26  
27  
28  
29  
30  
31  
32  
33  
34  
35  
36  
37  
38  
39  
40  
41  
42  
43  
44  
45  
46  
47  
48  
49  
50  
51  
52  
53  
54  
55  
56  
57  
58  
59  
60

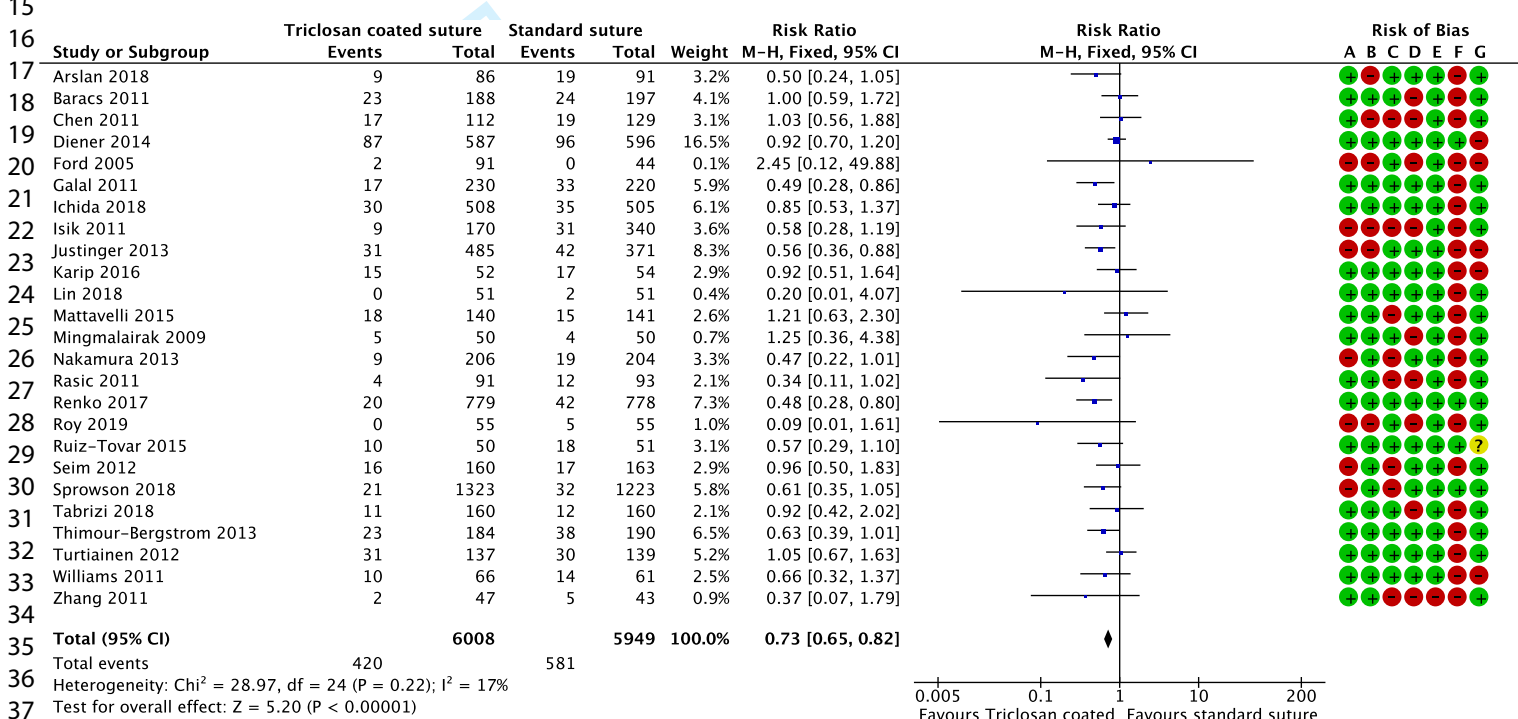

Risk of bias legend  
 (A) Random sequence generation (selection bias)  
 (B) Allocation concealment (selection bias)  
 (C) Blinding of participants and personnel (performance bias)  
 (D) Blinding of outcome assessment (detection bias)  
 (E) Incomplete outcome data (attrition bias)  
 (F) Selective reporting (reporting bias)  
 (G) Other bias

1  
2  
3  
4  
5  
6  
7  
8  
9  
10  
11  
12  
13  
14  
15  
16  
17  
18  
19  
20  
21  
22  
23  
24  
25  
26  
27  
28  
29  
30  
31  
32  
33  
34  
35  
36  
37  
38  
39  
40  
41  
42  
43  
44  
45  
46  
47  
48  
49  
50  
51  
52  
53  
54  
55  
56  
57  
58  
59  
60

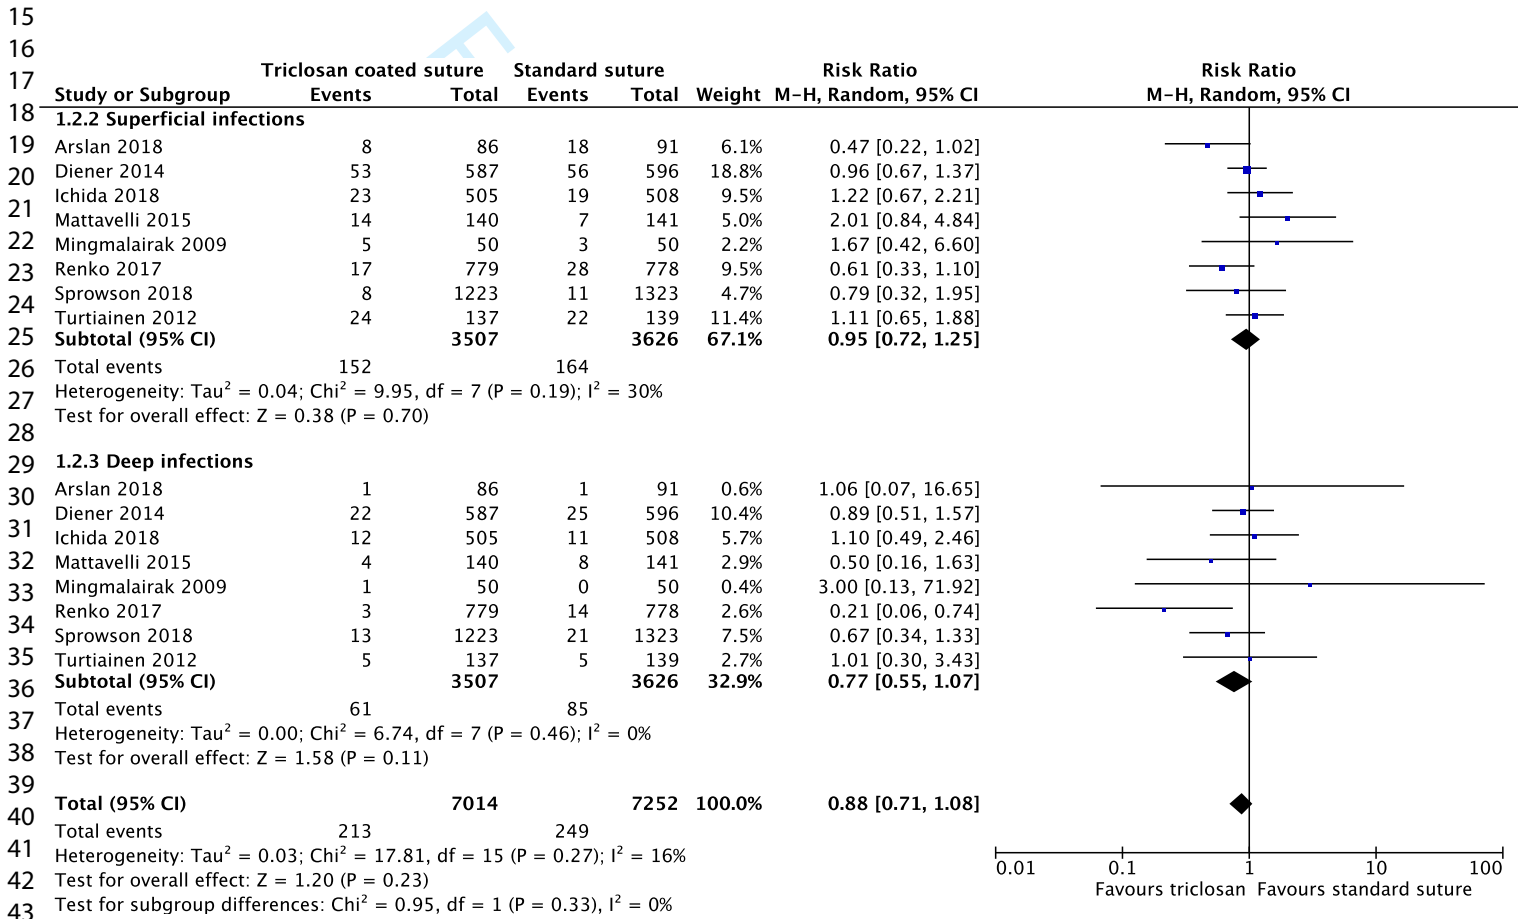



1  
2  
3  
4  
5  
6  
7  
8  
9  
10  
11  
12  
13  
14  
15  
16  
17  
18  
19  
20  
21  
22  
23  
24  
25  
26  
27  
28  
29  
30  
31  
32  
33  
34  
35  
36  
37  
38  
39  
40  
41  
42  
43  
44  
45  
46  
47  
48  
49  
50  
51  
52  
53  
54  
55  
56  
57  
58  
59  
60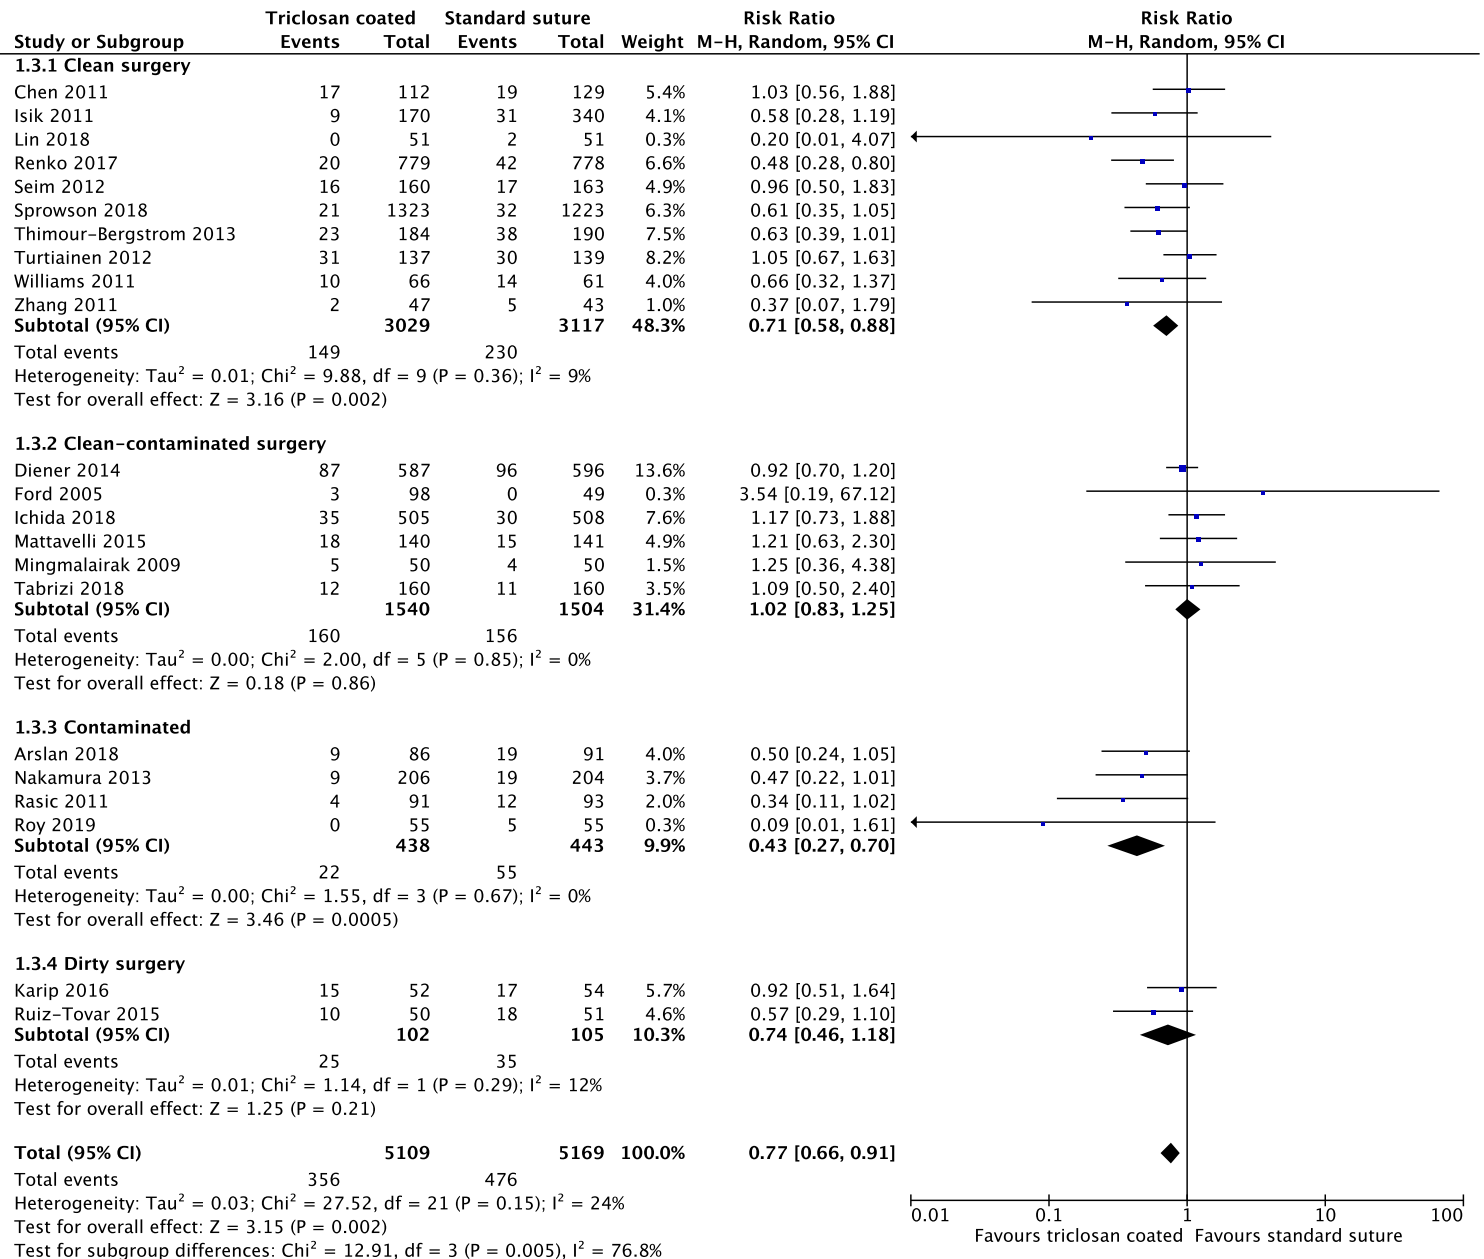

1  
2  
3  
4  
5  
6  
7  
8  
9  
10  
11  
12  
13  
14  
15  
16  
17  
18  
19  
20  
21  
22  
23  
24  
25  
26  
27  
28  
29  
30  
31  
32  
33  
34  
35  
36  
37  
38  
39  
40  
41  
42  
43  
44  
45  
46  
47  
48  
49  
50  
51  
52  
53  
54  
55  
56  
57  
58  
59  
60

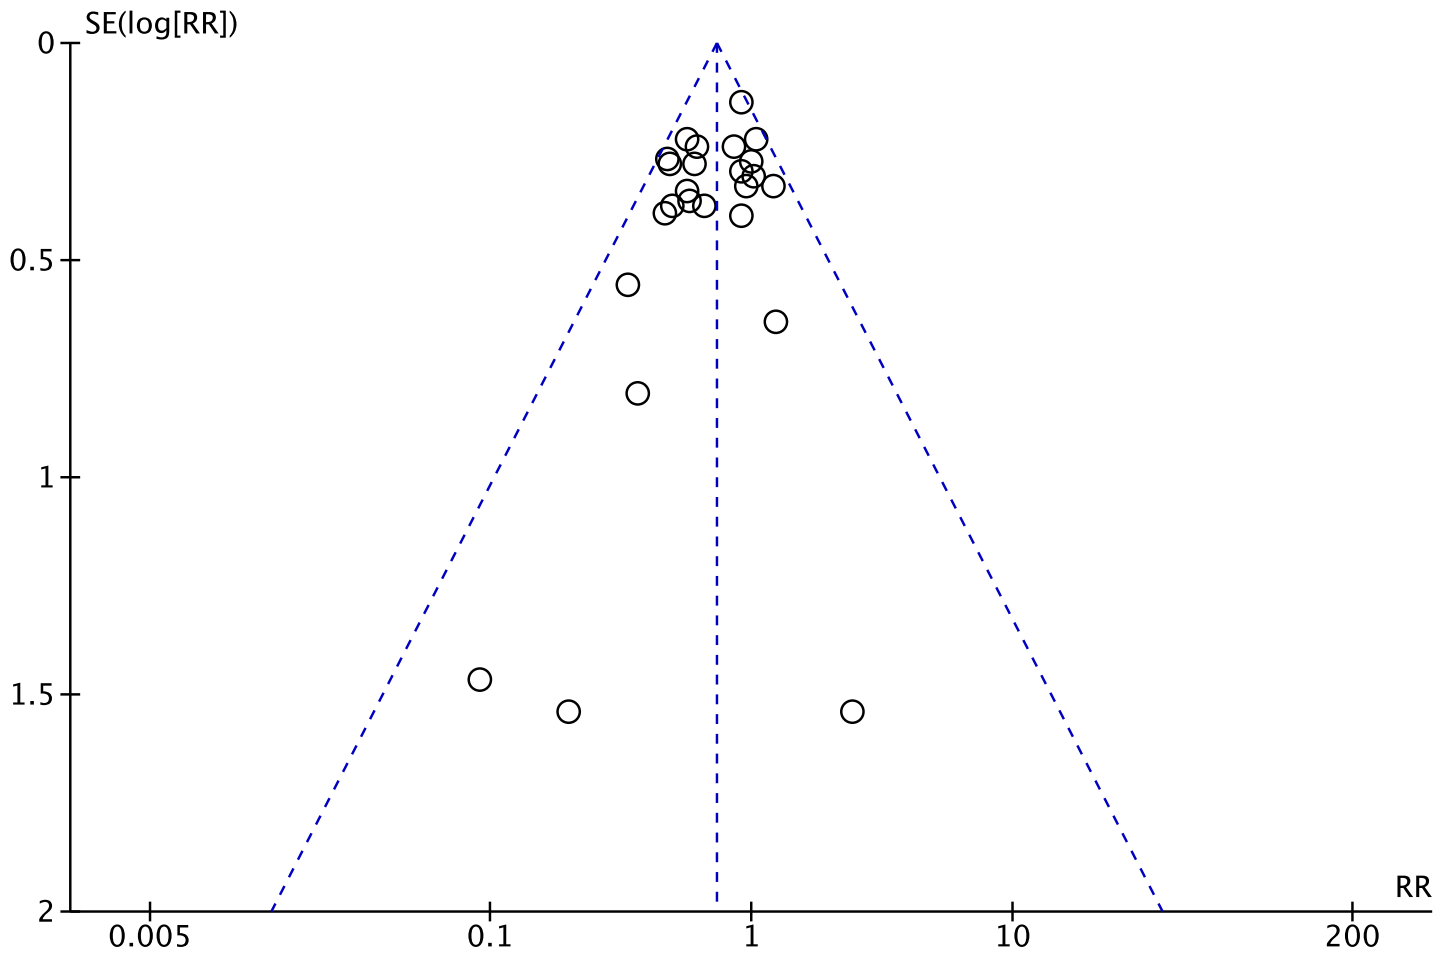

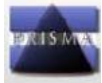

# PRISMA 2009 Checklist

| Section/topic                      | #  | Checklist item                                                                                                                                                                                                                                                                                              | Reported on page # |
|------------------------------------|----|-------------------------------------------------------------------------------------------------------------------------------------------------------------------------------------------------------------------------------------------------------------------------------------------------------------|--------------------|
| <b>TITLE</b>                       |    |                                                                                                                                                                                                                                                                                                             |                    |
| Title                              | 1  | Identify the report as a systematic review, meta-analysis, or both.                                                                                                                                                                                                                                         | 1                  |
| <b>ABSTRACT</b>                    |    |                                                                                                                                                                                                                                                                                                             |                    |
| Structured summary                 | 2  | Provide a structured summary including, as applicable: background; objectives; data sources; study eligibility criteria, participants, and interventions; study appraisal and synthesis methods; results; limitations; conclusions and implications of key findings; systematic review registration number. | 2                  |
| <b>INTRODUCTION</b>                |    |                                                                                                                                                                                                                                                                                                             |                    |
| Rationale                          | 3  | Describe the rationale for the review in the context of what is already known.                                                                                                                                                                                                                              | 4/5                |
| Objectives                         | 4  | Provide an explicit statement of questions being addressed with reference to participants, interventions, comparisons, outcomes, and study design (PICOS).                                                                                                                                                  | 6                  |
| <b>METHODS</b>                     |    |                                                                                                                                                                                                                                                                                                             |                    |
| Protocol and registration          | 5  | Indicate if a review protocol exists, if and where it can be accessed (e.g., Web address), and, if available, provide registration information including registration number.                                                                                                                               | 6                  |
| Eligibility criteria               | 6  | Specify study characteristics (e.g., PICOS, length of follow-up) and report characteristics (e.g., years considered, language, publication status) used as criteria for eligibility, giving rationale.                                                                                                      | 7-9 and table 1    |
| Information sources                | 7  | Describe all information sources (e.g., databases with dates of coverage, contact with study authors to identify additional studies) in the search and date last searched.                                                                                                                                  | 6                  |
| Search                             | 8  | Present full electronic search strategy for at least one database, including any limits used, such that it could be repeated.                                                                                                                                                                               | 6                  |
| Study selection                    | 9  | State the process for selecting studies (i.e., screening, eligibility, included in systematic review, and, if applicable, included in the meta-analysis).                                                                                                                                                   | 6/7                |
| Data collection process            | 10 | Describe method of data extraction from reports (e.g., piloted forms, independently, in duplicate) and any processes for obtaining and confirming data from investigators.                                                                                                                                  | 6/7                |
| Data items                         | 11 | List and define all variables for which data were sought (e.g., PICOS, funding sources) and any assumptions and simplifications made.                                                                                                                                                                       | 7                  |
| Risk of bias in individual studies | 12 | Describe methods used for assessing risk of bias of individual studies (including specification of whether this was done at the study or outcome level), and how this information is to be used in any data synthesis.                                                                                      | 7                  |
| Summary measures                   | 13 | State the principal summary measures (e.g., risk ratio, difference in means).                                                                                                                                                                                                                               | 8                  |
| Synthesis of results               | 14 | Describe the methods of handling data and combining results of studies, if done, including measures of consistency (e.g., $I^2$ ) for each meta-analysis. <a href="http://bmjopen.bmj.com/site/about/guidelines.xhtml">http://bmjopen.bmj.com/site/about/guidelines.xhtml</a>                               | 8                  |

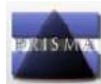

# PRISMA 2009 Checklist

Page 1 of 2

| Section/topic                 | #  | Checklist item                                                                                                                                                                                           | Reported on page # |
|-------------------------------|----|----------------------------------------------------------------------------------------------------------------------------------------------------------------------------------------------------------|--------------------|
| Risk of bias across studies   | 15 | Specify any assessment of risk of bias that may affect the cumulative evidence (e.g., publication bias, selective reporting within studies).                                                             | 7                  |
| Additional analyses           | 16 | Describe methods of additional analyses (e.g., sensitivity or subgroup analyses, meta-regression), if done, indicating which were pre-specified.                                                         | 8                  |
| <b>RESULTS</b>                |    |                                                                                                                                                                                                          |                    |
| Study selection               | 17 | Give numbers of studies screened, assessed for eligibility, and included in the review, with reasons for exclusions at each stage, ideally with a flow diagram.                                          | 8                  |
| Study characteristics         | 18 | For each study, present characteristics for which data were extracted (e.g., study size, PICOS, follow-up period) and provide the citations.                                                             | 8,9 table 1        |
| Risk of bias within studies   | 19 | Present data on risk of bias of each study and, if available, any outcome level assessment (see item 12).                                                                                                | 10, Figure 2       |
| Results of individual studies | 20 | For all outcomes considered (benefits or harms), present, for each study: (a) simple summary data for each intervention group (b) effect estimates and confidence intervals, ideally with a forest plot. | 9,10 Figure 2-5    |
| Synthesis of results          | 21 | Present results of each meta-analysis done, including confidence intervals and measures of consistency.                                                                                                  | 9,10 Figure 2-5    |
| Risk of bias across studies   | 22 | Present results of any assessment of risk of bias across studies (see Item 15).                                                                                                                          | 10, Figure 2       |
| Additional analysis           | 23 | Give results of additional analyses, if done (e.g., sensitivity or subgroup analyses, meta-regression [see Item 16]).                                                                                    | 9,10 Figure 2-5    |
| <b>DISCUSSION</b>             |    |                                                                                                                                                                                                          |                    |
| Summary of evidence           | 24 | Summarize the main findings including the strength of evidence for each main outcome; consider their relevance to key groups (e.g., healthcare providers, users, and policy makers).                     | 11, 12             |
| Limitations                   | 25 | Discuss limitations at study and outcome level (e.g., risk of bias), and at review-level (e.g., incomplete retrieval of identified research, reporting bias).                                            | 12,13              |
| Conclusions                   | 26 | Provide a general interpretation of the results in the context of other evidence, and implications for future research.                                                                                  | 13, 14             |



# PRISMA 2009 Checklist

1  
2  
3  
4  
5  
6  
7  
8  
9  
10  
11  
12  
13  
14  
15  
16  
17  
18  
19  
20  
21  
22  
23  
24  
25  
26  
27  
28  
29  
30  
31  
32  
33  
34  
35  
36  
37  
38  
39  
40  
41  
42  
43  
44  
45  
46  
47

|                |    |                                                                                                                                            |    |
|----------------|----|--------------------------------------------------------------------------------------------------------------------------------------------|----|
| <b>FUNDING</b> |    |                                                                                                                                            |    |
| Funding        | 27 | Describe sources of funding for the systematic review and other support (e.g., supply of data); role of funders for the systematic review. | 14 |

From: Moher D, Liberati A, Tetzlaff J, Altman DG, The PRISMA Group (2009). Preferred Reporting Items for Systematic Reviews and Meta-Analyses: The PRISMA Statement. PLoS Med 6(7): e1000097. doi:10.1371/journal.pmed1000097

For more information, visit: [www.prisma-statement.org](http://www.prisma-statement.org).

Page 2 of 2

For peer review only

# BMJ Open

## The use of triclosan coated sutures to prevent surgical site infections: a systematic review and meta-analysis of the literature

|                                 |                                                                                                                                                                                                                                                                                                                                                                       |
|---------------------------------|-----------------------------------------------------------------------------------------------------------------------------------------------------------------------------------------------------------------------------------------------------------------------------------------------------------------------------------------------------------------------|
| Journal:                        | <i>BMJ Open</i>                                                                                                                                                                                                                                                                                                                                                       |
| Manuscript ID                   | bmjopen-2019-029727.R2                                                                                                                                                                                                                                                                                                                                                |
| Article Type:                   | Research                                                                                                                                                                                                                                                                                                                                                              |
| Date Submitted by the Author:   | 29-Jul-2019                                                                                                                                                                                                                                                                                                                                                           |
| Complete List of Authors:       | Ahmed, Imran; University of Warwick, Clinical Trials Unit<br>Boulton, Adam; University Hospital Coventry<br>Rizvi, Sana; University Hospital Coventry<br>Carlos, William; University Hospital Coventry<br>Dickenson, Edward; University of Warwick, Warwick Medical School<br>Smith, NA; University of Warwick, Clinical Sciences Research Laboratories<br>Reed, Mike |
| <b>Primary Subject Heading</b>: | Surgery                                                                                                                                                                                                                                                                                                                                                               |
| Secondary Subject Heading:      | Infectious diseases                                                                                                                                                                                                                                                                                                                                                   |
| Keywords:                       | Surgical site infection, Triclosan, Systematic review                                                                                                                                                                                                                                                                                                                 |
|                                 |                                                                                                                                                                                                                                                                                                                                                                       |

SCHOLARONE™  
Manuscripts

# The use of triclosan coated sutures to prevent surgical site infections: a systematic review and meta-analysis of the literature

Imran Ahmed<sup>(1,2)</sup> ([imran.ahmed4@nhs.net](mailto:imran.ahmed4@nhs.net)), Adam J Boulton<sup>(1,2)</sup> ([adam.boulton@nhs.net](mailto:adam.boulton@nhs.net)), Sana Rizvi<sup>(2)</sup> ([sana.rizvi@nhs.net](mailto:sana.rizvi@nhs.net)). William J Carlos<sup>(2)</sup> ([William.carlos@nhs.net](mailto:William.carlos@nhs.net)), Edward Dickenson<sup>(1,2)</sup> ([e.j.l.dickenson@warwick.ac.uk](mailto:e.j.l.dickenson@warwick.ac.uk)), Nicholas Smith<sup>(1)</sup> ([nickasmith@doctors.net.uk](mailto:nickasmith@doctors.net.uk)), Mike Reed<sup>(4)</sup> ([mike.reed@nhs.net](mailto:mike.reed@nhs.net))

1: University of Warwick, Clinical trials Unit, Warwick Medical school, CSRL, UHCW, Coventry CV22DX, Coventry CV4 7AL

2: University Hospital Coventry and Warwickshire, Clifford Bridge Road, Coventry, CV2 2DX

3: Northumbria Healthcare NHS Foundation Trust, Northumberland, NE23 6NZ

Corresponding author

Imran Ahmed

University of Warwick, Warwick Clinical trials Unit, Warwick Medical school, Gibbett Hill Campus, Coventry CV4 7AL

[Imran.ahmed4@nhs.net](mailto:Imran.ahmed4@nhs.net)

02476968630

Orchid ID: 0000-0003-2774-9954

## ABSTRACT

### Introduction and objectives

Surgical site infections (SSIs) represent a common and serious complication of all surgical interventions.

Micro-organisms are able to colonise sutures that are implanted in the skin, which is a causative factor of SSIs. Triclosan coated sutures are antibacterial sutures aimed at reducing surgical site infections.

Our objective is to update the existing literature by systematically reviewing available evidence to assess the effectiveness of triclosan coated sutures in the prevention of surgical site infections.

### Methods

A systematic review of EMBASE, MEDLINE, AMED (Allied and complementary medicine database) and CENTRAL was performed to identify full text randomised controlled trials (RCTs) on 31/05/2019.

### Intervention

Triclosan coated sutures versus non triclosan coated sutures.

### Primary outcome

Our primary outcome was the development of surgical site infections at 30 days post operatively. A meta-analysis was performed using a fixed effects model.

### Results

Twenty five RCTs were included involving 11,957 participants. Triclosan coated sutures were used in 6008 participants and non triclosan coated sutures were used in 5949. Triclosan coated sutures significantly reduced the risk of surgical site infections at 30 days (RR 0.73, 95% CI 0.65 to 0.82). Further sensitivity analysis demonstrated that triclosan coated sutures significantly reduced the risk of surgical site infections in both clean and contaminated surgery.

### Conclusion

Triclosan coated sutures have been shown to significantly reduced the risk of surgical site infections when compared to standard sutures. This is in agreement with previous work in this area. This study represented the largest review to date in this area. This moderate quality evidence recommends the use



1 of Triclosan coated sutures in order to reduce the risk of SSIs particularly in clean and contaminated  
2  
3 surgical procedures.  
4

## 5 Registration

6 PROSPERO (Reference: CRD42014014856).  
7

## 8 Key words

9 Surgical site infection, triclosan, systematic review  
10

## 11 Article summary

### 12 Strengths and limitations of this study

#### 13 Strengths

- 14 • Systematic nature of data collection and analysis
- 15 • Largest review to date in this topic area
- 16 • Analyses performed comparing different classifications of surgery i.e clean, clean-contaminated,  
17 contaminated and dirty.

#### 18 Limitations

- 19 • Heterogeneous nature of included studies. E.g. different age of participants, co-morbidities and  
20 surgery type.

#### 21 Original protocol

22 A protocol for this review was prospectively registered with PROSPERO (Reference: CRD42014014856).  
23

#### 24 Funding statement

25 This research received no specific grant from any funding agency in the public, commercial or not-for-  
26 profit sectors  
27

#### 28 Competing interests

29 All authors report no competing interests.  
30

31 Word count: 3596  
32  
33  
34  
35  
36  
37  
38  
39  
40  
41  
42  
43  
44  
45  
46  
47  
48  
49  
50  
51  
52  
53  
54  
55  
56  
57  
58  
59  
60

## INTRODUCTION

Surgical site infections (SSIs) represent a common complication throughout all surgical procedures<sup>1</sup>. It is estimated that SSIs account for 5% of all surgical complications<sup>2</sup> and 20% of all healthcare associated infections<sup>3,4</sup>. It is generally believed that the number of surgical procedures, particularly in elective orthopaedics<sup>5</sup>, will increase over the next decade, therefore increasing the incidence of SSIs. SSIs are associated with prolonged hospital admission<sup>6</sup> and increased morbidity and mortality<sup>7,8,9</sup>. In addition to having a significant impact on patient care and experience, SSIs also add substantial costs to healthcare providers. It is estimated that SSIs cost UK healthcare services approximately £61 million in 2012<sup>10</sup> and figures from the US highlight the extensive cost of SSIs with an estimated additional \$2300 per case<sup>11</sup>. Furthermore, Fleck *et al.* found that the mean cost of treated a SSI following sternal wound incision was \$11,200<sup>12</sup>. These are conservative estimates as active surveillance of SSIs not routinely performed<sup>6</sup>.

Due to the wide ranging deleterious effects of SSIs and their treatment, particularly in the context of increasing numbers of surgical procedures, there is a clinical need to reduce the incidence of SSIs. SSIs are multifactorial with patient factors such as age, co-morbidities including diabetes, and immunosuppression<sup>7,13-15</sup> contributing to their development, along with surgical factors. Many patient factors may not be optimised and hence research focus has been placed on surgical factors, including suture material.

SSIs may arise when bacteria colonise the suture material<sup>16</sup>, creating a biofilm as it passes through the skin<sup>17</sup>. This biofilm establishes an immunity from both antimicrobial treatment and the host immune system<sup>6,17</sup>. Once this biofilm develops there is an increased chance of a SSI developing. Research has shown bacteria may colonise monofilament and braided sutures<sup>18-20</sup>. With this in mind, considerable work has been carried out since the 1950s with regards to coating suture material with an antimicrobial, including silver<sup>21,22</sup>. Triclosan (polychlorophenoxyphenol) has been used for its antiseptic properties for

1 many years in toothpaste and soap and has an established safety profile<sup>5</sup>. Triclosan has been used to  
2  
3 successfully coat the following sutures and gained FDA (US food and drug administration) approval in  
4  
5 2002: braided polyglactan 910 (Vicryl Plus), poliglecaprone 25 (Monocryl Plus) and polydioxanone (PDS  
6  
7 Plus).  
8  
9

10  
11  
12  
13 *In vitro* and *in vivo* studies have shown the effectiveness of triclosan coated sutures<sup>23-25</sup> in killing bacteria  
14  
15 associated with SSIs and inhibiting colonisation of suture material, with one study demonstrating a 66%  
16  
17 reduction in bacterial colonisation<sup>26</sup>. Since then a large number of randomised control trials (RCTs) have  
18  
19 been performed with contrasting results of the effectiveness of triclosan coated sutures in the prevention  
20  
21 of SSIs. Subsequent meta-analyses have also produced conflicting results and hence the true effect  
22  
23 remains unclear<sup>6,7,27-32</sup>. The most recent and largest systematic review to date was performed by De Jonge  
24  
25 *et al.* and found triclosan coated sutures significantly reduced the incidence of SSIs<sup>32</sup>. This review searched  
26  
27 the literature up until November 2015 and included 6462 patients from RCTs published in peer-reviewed  
28  
29 journals as well as conference abstracts. Performing robust methodological appraisal of conference  
30  
31 abstracts is not possible, they do not permit thorough risk of bias assessments, and as they have not  
32  
33 undergone the formal journal peer-review process, they represent a potentially biased and unreliable  
34  
35 source of data. Since this review, a number of large, high quality RCTs have been produced<sup>33,34</sup>. Of note,  
36  
37 a recent RCT of 2546 patients found that triclosan coated sutures did not reduce the incidence of SSIs; a  
38  
39 finding in contrast to the previous systematic review<sup>32,34</sup>. This represents a substantial increase in the  
40  
41 number of patients available for meta-analysis since the last review. As a result, we believe it is important  
42  
43 to update the existing literature by performing a new, up to date, systematic review and meta-analysis to  
44  
45 assimilate the current evidence and inform clinical practice. A new review should include a detailed risk  
46  
47 of bias assessment and GRADE assessment of the quality of evidence.  
48  
49  
50  
51  
52  
53  
54  
55  
56  
57  
58  
59  
60

1 This new systematic review and meta-analysis of the available literature aims to determine whether the  
2  
3 use of triclosan coated sutures reduces the incidence of SSIs in comparison to standard non-coated  
4  
5 sutures.  
6  
7  
8  
9

## 10 11 **PICOS statement** 12

13  
14 The included population encompasses patients of any age and gender undergoing any surgical procedure  
15  
16 utilising sutures to close the wound. The intervention studied is the use of triclosan coated sutured and  
17  
18 comparison is made with non-triclosan coated sutures. The outcomes assessed are the rates of SSIs,  
19  
20 including superficial and deep SSIs. This systematic review will only include RCTs.  
21  
22  
23  
24  
25  
26  
27

## 28 29 **METHODS** 30

31  
32 A systematic review of the available literature was conducted and is reported in accordance with the  
33  
34 Preferred Reporting Items for Systematic Reviews and Meta-Analyses (PRISMA) guidance<sup>35</sup>. A protocol for  
35  
36 this review was prospectively registered with PROSPERO (Reference: CRD42014014856).  
37  
38  
39

## 40 41 **Search methods** 42

43  
44 Electronic searches were conducted using OVID SP on the following databases: MEDLINE(1946-May Week  
45  
46 4 2019); Excerpta Medica Database (EMBASE) (1974 to 2019 May 31); Allied and Complementary  
47  
48 Medicine (AMED) (1985 to May 2019); and Cochrane Central Register of Controlled Trials (CENTRAL). A  
49  
50 multi-purpose search was performed for all terms and the search terms were: "Triclosan", "Anti-bacterial  
51  
52 agents", "Anti-infective agents, local", "Coated materials, biocompatible", "Biomimetic material",  
53  
54 "Sutures", "Vicryl Plus", "Monocryl Plus", "PDS Plus", "Surgical site infection", "Surgical Wound infection".  
55

56  
57 The search was conducted on 31<sup>st</sup> May 2019. A copy of the search strategy can be seen in supplementary  
58  
59 file 1.  
60

## 1      **Selection of Studies**

2  
3      Two authors (IA and AB) independently selected studies for inclusion. Any discrepancies were resolved by  
4  
5      discussion with a third author (ED). Titles and abstracts were screened and full texts obtained for any  
6  
7      studies of interest. The eligibility criteria were formed from the PICOS statement and registered on  
8  
9      PROSPERO prior to undertaking the search. Only RCTs published in peer-reviewed journals presenting  
10  
11      new data were included.  
12  
13

## 16      **Data extraction**

17  
18      Data was independently extracted from eligible included studies onto predetermined forms by two  
19  
20      authors (IA and AB). Any discrepancies were then resolved following discussion between two authors (IA  
21  
22      and AB) and a third author. Data extracted included baseline patient characteristics, surgical procedures  
23  
24      performed, number of centres, suture material, SSI diagnostic criteria, length of follow up, routine  
25  
26      prophylactic antibiotic use and number of SSIs. Data regarding superficial of deep SSI was extracted when  
27  
28      possible. Information regarding randomisation, blinding, funding and country of origin was extracted.  
29  
30  
31

## 34      **Assessment of Risk of Bias**

35  
36      Two authors (IA and AB) independently appraised eligible studies according to the Cochrane  
37  
38      Collaboration's risk of bias tool, resolving any discrepancies with a third author (ED) as necessary<sup>36</sup>. Review  
39  
40      Manager version 5.3 (The Nordic Cochrane Centre, The Cochrane Collaboration, 2014) was used to  
41  
42      generate the summary figures. The parameters used for 'other' sources of bias included source of funding  
43  
44      and antibiotic regime.  
45  
46

47  
48      Two authors (IA and AB) independently assessed the quality of evidence. We used the GRADE  
49  
50      considerations (study limitations, consistence of effect, imprecision, indirectness and publication bias) to  
51  
52      assess the quality of the body of evidence<sup>37</sup>. Decisions to upgrade or downgrade body of evidence have  
53  
54      been clearly stated in the discussion.  
55  
56  
57  
58  
59  
60

1 Publication bias was assessed following construction of a funnel plot in order to identify the presence or  
2  
3 absence of bias of this kind.  
4  
5

## 6 **Statistical analysis**

7  
8  
9 A fixed effects model was used to calculate the predominant relative risk (RR) and the 95% confidence  
10  
11 intervals of the studies included. Statistically heterogeneity was first assessed using a funnel plot and  
12  
13 more formally using the  $I^2$  statistic<sup>36</sup>. Forest plots were then generated summarising the results of the  
14  
15 meta-analysis using Review Manager 5.3.  
16  
17

## 18 **Patient and Public Involvement**

19  
20 Given the design of this study and the retrospective nature, patient and public members were not  
21  
22 involved in the development and conduct of this review. With the aid of patient and public members we  
23  
24 will produce lay summaries of the results available for patients.  
25  
26  
27

## 28 **RESULTS**

29  
30 The search revealed 357 records of possible relevance. No other sources of records were identified.  
31  
32 Removal of duplicates left 249 records to be examined. 219 records were excluded based on title and  
33  
34 abstract screening. 30 full texts were assessed for eligibility and 25 studies were included in the meta-  
35  
36 analysis (see figure 1)<sup>2,7,11,33,34,38-57</sup>.  
37  
38  
39

### 40 **Study characteristics**

41  
42  
43 Study characteristics are summarised in table 1. Twenty-five RCTs were included in this review involving  
44  
45 11,957 patients<sup>2,7,11,33,34,38-57</sup>. There were 6008 patients randomised to triclosan coated sutures and 5949  
46  
47 patients to standard sutures. In studies which reported mean age, the mean age reported in 23 out of 25  
48  
49 studies was comparable between the two groups (54.8 vs 54.8). For the studies which reported gender  
50  
51 57% of the included patients were male. Eight studies were multi-centre, with the remainder single-centre  
52  
53 studies (n=17). Vicryl was compared with Vicryl Plus in twelve studies<sup>11,34,39-41,43,46-49,54,56</sup>, three studies  
54  
55 compared PDS and versus PDS Plus<sup>7,38,55</sup>, one study compared PDS II with PDS II Plus<sup>44</sup>, two study  
56  
57  
58  
59  
60

1 compared Monocryl against Monocryl Plus<sup>45,57</sup>, one compared Chinese silk with Vicryl Plus<sup>53</sup>, four studies  
2  
3 compared Vicryl and Monocryl versus Vicryl Plus and Monocryl Plus<sup>33,50-52</sup>, and two studies compared  
4  
5 Vicryl and PDS versus Vicryl Plus and PDS Plus<sup>2,42</sup>.  
6  
7

8 To define SSI, the Centre for disease control (CDC) criteria were used by 18 studies<sup>2,7,11,33,34,41-44,48,50-57</sup>,  
9  
10 clinical diagnosis or wound cultures was used by three studies studies<sup>39,45,49</sup>, and four did not provide  
11  
12 explicit definitions<sup>38,40,46,47</sup>. Seventeen studies used a follow up duration of 30 days or one month or four  
13  
14 weeks<sup>2,7,11,33,34,38,41-43,46,49,51,53-57</sup>, three for six weeks<sup>48,50,52</sup>, two for two weeks<sup>44,45</sup>, one for 80 days<sup>40</sup>, one  
15  
16 until discharge<sup>47</sup>, and one study did not specify a follow-up regime<sup>39</sup>. Routine prophylactic antibodies  
17  
18 were used in 19 studies<sup>2,7,11,34,38,39,42,44-51,54-57</sup>, no prophylactic antibiotics were used in one study<sup>40</sup>, one  
19  
20 used prophylactic antibiotics in high risk patients only<sup>52</sup>, one study used prophylactic antibiotics in 30% of  
21  
22 participants<sup>33</sup>, and three did specify prophylactic antibiotic use<sup>41,43,53</sup>.  
23  
24  
25  
26  
27

### 28 **Surgical site infection**

29  
30 The risk of developing surgical site infection was significantly reduced in the triclosan group compared to  
31  
32 the standard suture group (RR 0.73, 95% CI 0.65 to 0.82). Heterogeneity was low to moderate ( $\chi^2=24.66$ ,  
33  
34  $P=0.21$ ,  $I^2=17\%$ ). There were 420 instances of SSI amongst 6008 patients in the triclosan coated suture  
35  
36 group and 581 SSIs in 5949 patients in the standard suture group. See figure 2.  
37  
38  
39

### 40 **Sub-group analysis**

41  
42 Eight studies reported superficial and deep infections separately<sup>2,7,33,34,42,46,51,57</sup>. There were 152/3507  
43  
44 cases of superficial SSI in the triclosan group and 164/3626 cases in the standard suture group, producing  
45  
46 a meta-analysis risk ratio of 0.95 (95% CI 0.72 to 1.25). The risk of developing a deep infection was lower  
47  
48 in the triclosan group when compared to the standard suture group, however this was not significant (RR  
49  
50 0.77, 95% CI 0.55 to 1.07). There were 61/3507 cases of deep infections in the triclosan group and 85/3626  
51  
52 cases in the standard suture group. See figure 3.  
53  
54  
55  
56  
57  
58  
59  
60

1 Ten studies reported the incidence of surgical site infection for clean surgery<sup>33,39,43,49-53,56,58</sup>. Triclosan  
2 coated sutures were associated with a significantly lower incidence of SSI (149/3029) when compared to  
3 standard sutures (230/1117) (RR 0.71, 95% CI 0.58 to 0.88).  
4  
5  
6

7  
8 Six studies reported clean contaminated surgery and there was no difference between the two groups  
9  
10 (160/1540 vs 156/1504) (RR 1.02, 95% CI 0.83,1.25)<sup>2,7,40,42,46,54</sup>.  
11  
12

13 Four studies reported the incidence of surgical site infections in contaminated surgery<sup>11,47,55,57</sup>. Triclosan  
14 coated sutures were associated with a significantly lower risk of SSI (22/438) when compared to standard  
15 sutures (55/443) (RR 0.43, 95% CI 0.27 to,0.7).  
16  
17  
18

19  
20 Two further studies reported the incidence of surgical site infection for dirty surgery<sup>45,48</sup>. There was no  
21 significant difference in the incidence of SSIs between the two groups of sutures (25/102 vs 35/105) (RR  
22 0.74, 95% CI 0.46 to 1.18). See figure 4.  
23  
24  
25  
26  
27  
28  
29  
30

### 31 Risk of bias

32  
33 The results of the risk of bias screening can be seen on figure 2. The majority of studies had a clear  
34 randomisation sequence generation and allocation concealment using sealed envelopes. Five out of  
35 twenty five (20%) had high risk of selection bias, either because the randomisation method was not stated  
36 or a quasirandomisation method was used. Two further studies had a risk of selection bias due to unclear  
37 allocation concealment methods. Ten out of twenty five studies (40%) had high risk of performance and  
38 detection bias due to either absence of blinding of the participants and outcome assessors or the methods  
39 of blinding were not stated. Four out of twenty five (16%) were at high risk of other bias due to source of  
40 funding. One study had differences in antibiotic regime between the two groups, with one group not  
41 receiving any antibiotic prophylaxis.  
42  
43  
44  
45  
46  
47  
48  
49  
50  
51  
52  
53  
54

55 The distribution of studies in the funnel plot was symmetrical. No evidence was found for publication bias  
56 in this analysis (figure 5).  
57  
58  
59  
60



1 Statistical heterogeneity was assessed using the  $\tau^2$  (0.02) test and the  $I^2$  (17%) test, indicating there is low  
2  
3  
4 heterogeneity between the studies included in this review based on the recommendations in the  
5  
6 Cochrane handbook.  
7

## 8 **DISCUSSION**

9  
10  
11 This large systematic review of 25 randomised clinical trials included 11,957 patients and there were 1001  
12  
13 instances of SSI. The subsequent meta-analysis supports the use of triclosan-coated sutures in reducing  
14  
15 the risk of surgical site infections. We report a significantly lower risk of SSI when triclosan coated sutures  
16  
17 were used, compared to standard sutures in RCTs. Triclosan coated sutures were used in a wide range of  
18  
19 surgeries, including both adult and paediatric patients. The use of triclosan coated sutures significantly  
20  
21 reduced the risk of SSI in meta-analyses of clean surgery and also contaminated surgery. Further subgroup  
22  
23 analysis revealed a non-statistically significant reduction in the risk of developing deep SSIs with triclosan  
24  
25 coated sutures. Triclosan coated sutures appear to have no effect on the incidence of superficial SSIs.  
26  
27

28  
29 There have been 11 previous reviews in this topic area, the results of these reviews have been summarised  
30  
31 in table 2 <sup>27,28,30-32,59-64</sup>. Our results support the findings of Konstantelias et al who concluded that triclosan  
32  
33 coated sutures were associated with a significantly lower risk of SSI when compared to standard sutures  
34  
35 <sup>32,65</sup>. In addition, the authors concluded that triclosan coated sutures significantly reduced the risk of SSI  
36  
37 in clean, clean-contaminated, and contaminated surgery; in agreement with our findings <sup>65</sup>. De Jonge et  
38  
39 al reported a meta-analysis of 21 RCTs including 6462 patients, also concluding that triclosan coated  
40  
41 sutures significantly reduced the risk of SSI compared to standard sutures <sup>32</sup>. Five out of eleven reviews  
42  
43 included a risk of bias assessment<sup>27,31,32,60,64</sup> and only one review assessed the quality of evidence using  
44  
45 the GRADE criteria <sup>60</sup>.  
46  
47  
48  
49  
50  
51

### 52 **Quality of evidence**

53  
54 Using the GRADE criteria, the evidence was graded as 'moderate' quality. The reason for downgrading  
55  
56 was due to study limitations. Studies had high risk of selection bias due to unclear randomisation and  
57  
58 allocation methods. In addition, studies had a high risk of performance and detection bias due to issues  
59  
60

1 with blinding of participants and outcome assessors. The body of evidence was not downgraded for  
2  
3 inconsistency as there was narrow point estimates and low study heterogeneity ( $I^2=17\%$ ). There were no  
4  
5 issues with indirectness or imprecision as the outcome measures used are directly aligned to the outcome  
6  
7 measures of interest in this review. There were also a large number of participants included in this review  
8  
9 with satisfactory event rate numbers. Our symmetrical funnel plot indicated no risk of publication bias.  
10  
11 Given the quality of the evidence we are moderately confident in the effect estimate, the true effect is  
12  
13 likely to be close to the estimate of the effect.  
14  
15  
16  
17  
18  
19

20 The strengths of this current review include the thorough and systematic nature of data collection. This  
21  
22 review represents the most up to date review of the literature and is the largest review of RCTs to date,  
23  
24 including 11,957 patients from 25 RCTs. A recent RCT in elective hip and knee surgery included 2546  
25  
26 participants, the largest RCT to date in this subject<sup>58</sup>. This review is the only review to include this  
27  
28 important and well-conducted study. In addition, this systematic review only included peer-reviewed  
29  
30 studies with published full texts. Previous meta-analyses have included conference abstracts which do  
31  
32 not go through the same rigorous peer-review process as full journal publications and thus represent a  
33  
34 potential danger to review quality<sup>32</sup>. Furthermore, robust quality and risk of bias assessment is not  
35  
36 possible with these abstract publications<sup>66</sup>. A further strength of this review is the detailed and systematic  
37  
38 quality assessments, along with robust Cochrane risk of bias assessments, of all included studies<sup>36,66</sup>. As  
39  
40 demonstrated in table 2 five out of eleven reviews assessed risk of bias and one out of eleven reviews  
41  
42 assessed the quality of evidence. A strength of this review is the inclusion of a thorough risk of bias and  
43  
44 GRADE assessment. In addition, this new review included further detailed sub group analysis based on  
45  
46 superficial vs deep surgical infections and based on type of surgery e.g. clean, clean contaminated,  
47  
48 contaminated and dirty surgery.  
49  
50  
51  
52  
53  
54  
55  
56  
57  
58  
59  
60

1 The main weakness of this review is the study population. The review includes procedures which were  
2  
3 classed as clean, clean- contaminated, contaminated, and dirty. These types of surgery would all have  
4  
5 differing rates of SSI. The authors therefore performed a sub-analyses of the different categories of  
6  
7 surgery. Routine antibiotic prophylaxis was used in 15 studies<sup>2,7,11,38,39,42,44-51,58</sup> with a variation in the  
8  
9 antibiotic agent used and the timing. This is a potential confounder for the frequency of SSI<sup>67</sup>. A proportion  
10  
11 of the included studies assessed patients with an underlying malignancy who may have been  
12  
13 immunosuppressed. This influences the rate of SSI and is not accounted for in many of the included  
14  
15 studies<sup>68</sup>. Another weakness is the heterogeneity in the use of triclosan coated sutures. In some studies,  
16  
17 triclosan was used for closure of all surgical layers, whereas in other studies triclosan coated sutures were  
18  
19 only used on the superficial layers. This study heterogeneity should be noted when interpreting the meta-  
20  
21 analysis result. This review reports trials using CDC criteria for superficial site infections. It is important to  
22  
23 note that a stitch abscess does not meet the criteria for a superficial site infections. Patients may present  
24  
25 with a stitch abscess to healthcare professionals and undergo treatment. This study does not report the  
26  
27 impact of triclosan coated sutures on stitch abscesses.  
28  
29  
30  
31  
32  
33  
34  
35  
36

37 Our review is the largest review of RCTs to date in terms of patient numbers and demonstrates clinical  
38  
39 effectiveness of triclosan coated sutures when compared to standard sutures when assessing SSI rate.  
40  
41 SSIs have been shown to have a significant impact on patient quality of life, as well as an increased burden  
42  
43 on healthcare providers in terms of resource allocation. The cost of triclosan sutures is variable, however  
44  
45 the cost of SSI to patients and healthcare providers is sizeable<sup>10-12</sup>. A robust cost-analysis has not been  
46  
47 performed, nevertheless, organisations should consider carefully whether they routinely use triclosan  
48  
49 coated sutures in light of these positive meta-analysis findings. This review also identified that triclosan  
50  
51 coated sutures significantly reduced the risk of SSIs in clean and contaminated surgery, therefore  
52  
53 thoughtful consideration should be paid to whether they are routinely used in this patient population.  
54  
55 The results demonstrate that triclosan coated sutures may not be as effective in reducing SSI rate in 'clean-  
56  
57  
58  
59  
60

1 contaminated' and 'dirty' surgery. However, a potential explanation for 'dirty' surgery is the low patient  
2  
3 numbers included in this subgroup. This is a potential area of future research given the effectiveness of  
4  
5 triclosan coated sutures in 'clean' and 'contaminated' surgery.  
6  
7  
8  
9

## 10 11 **Conclusion**

12  
13 This systematic review identified 25 RCTs examining the effect of triclosan in reducing incidence of SSI,  
14  
15 compared with non-coated sutures. The subsequent meta-analysis included 11,957 patient and revealed  
16  
17 an overall a risk ratio of RR 0.73, (95% CI 0.65 to 0.82) of developing SSI in favour of triclosan coated  
18  
19 sutures, thereby demonstrating a statistically significant lower risk of SSI following closure of a surgical  
20  
21 wound with triclosan coated sutures. Further analysis has demonstrated that triclosan coated sutures  
22  
23 significantly reduced the risk of SSIs in clean and contaminated surgery. This study is in agreement with  
24  
25 previous smaller and less robust reviews which have produced comparable results. This is the largest  
26  
27 review of RCTs in terms of number of included studies and number of participants from RCTs to  
28  
29 demonstrate the clinical effectiveness of triclosan coated sutures. Further detailed cost effectiveness is  
30  
31 required to assess the economic benefit of implementing the use of these sutures. The evidence  
32  
33 considered in this review suggests that triclosan coated sutures are effective in reducing surgical site  
34  
35 infections, the use should in particular be considered in clean and contaminated surgery.  
36  
37  
38  
39  
40  
41  
42  
43  
44  
45

## 46 **Acknowledgements**

47  
48 The authors would like to acknowledge Andrew Sprowson who died unexpectedly on 13 March 2015.  
49  
50 Andrew played a key role in conceiving the idea for this review and provided the early supervision to  
51  
52 ensure this review took place successfully. Andrew was an academic orthopaedic surgeon who was  
53  
54 dedicated to improving evidence-based care in his field. He was an exceptional researcher, surgeon,  
55  
56 colleague and friend greatly missed by all of us.  
57  
58  
59

## 60 **Funding**

1 This research received no specific grant from any funding agency in the public, commercial or not-for-  
2  
3 profit sectors  
4

#### 5 Competing interests

6  
7  
8 The authors report no competing interests for this study  
9

#### 10 Ethical Approval

11  
12  
13 No ethical approval required for this study.  
14

#### 15 Data Statement

16  
17  
18 Raw data is available on request by email to the corresponding author.  
19

#### 20 Author contributions

21  
22  
23 All authors contributed to the production of this manuscript and meet the ICMJE criteria.  
24

- 25 • IA: Conception of review, data collection, analysis, drafted final manuscript
- 26
- 27 • AB: Data collection, analysis, drafted final manuscript
- 28
- 29 • SR: Data analysis and revised final manuscript
- 30
- 31 • WC: Data analysis and revised final manuscript
- 32
- 33 • ED: Data collection and revision of final manuscript
- 34
- 35 • NS: Revision of final manuscript
- 36
- 37 • MR: Conception of idea and revision of final manuscript
- 38
- 39
- 40
- 41
- 42
- 43
- 44
- 45
- 46
- 47
- 48
- 49
- 50
- 51
- 52
- 53
- 54
- 55
- 56
- 57
- 58
- 59
- 60

1  
2  
3  
4  
5  
6  
7  
8  
9  
10  
11  
12  
13  
14  
15  
16  
17  
18  
19  
20  
21  
22  
23  
24  
25  
26  
27  
28  
29  
30  
31  
32  
33  
34  
35  
36  
37  
38  
39  
40  
41  
42  
43  
44  
45  
46  
47  
48  
49  
50  
51  
52  
53  
54  
55  
56  
57  
58  
59  
60  

## REFERENCES

1. Magill SS, Edwards JR, Bamberg W, et al. Multistate Point-Prevalence Survey of Health Care–Associated Infections. *The New England journal of medicine* 2014; **370**(13): 1198-208.
2. Mattavelli I, Rebori P, Doglietto G, et al. Multi-Center Randomized Controlled Trial on the Effect of Triclosan-Coated Sutures on Surgical Site Infection after Colorectal Surgery. *Surg Infect (Larchmt)* 2015; **16**(3): 226-35.
3. Leaper DJ. Surgical-site infection. *The British journal of surgery* 2010; **97**(11): 1601-2.
4. Hranjec T, Swenson BR, Sawyer RG. Surgical site infection prevention: how we do it. *Surgical infections* 2010; **11**(3): 289-94.
5. Kurtz S, Ong K, Lau E, Mowat F, Halpern M. Projections of primary and revision hip and knee arthroplasty in the United States from 2005 to 2030. *The Journal of bone and joint surgery American volume* 2007; **89**(4): 780-5.
6. Chang WK, Srinivasa S, Morton R, Hill AG. Triclosan-impregnated sutures to decrease surgical site infections: systematic review and meta-analysis of randomized trials. *Ann Surg* 2012; **255**(5): 854-9.
7. Diener MK, Knebel P, Kieser M, et al. Effectiveness of triclosan-coated PDS Plus versus uncoated PDS II sutures for prevention of surgical site infection after abdominal wall closure: the randomised controlled PROUD trial. *Lancet* 2014; **384**(9938): 142-52.
8. de Lissovoy G, Fraeman K, Hutchins V, Murphy D, Song D, Vaughn BB. Surgical site infection: incidence and impact on hospital utilization and treatment costs. *American journal of infection control* 2009; **37**(5): 387-97.
9. Kirkland KB, Briggs JP, Trivette SL, Wilkinson WE, Sexton DJ. The impact of surgical-site infections in the 1990s: attributable mortality, excess length of hospitalization, and extra costs. *Infection control and hospital epidemiology* 1999; **20**(11): 725-30.
10. Namba RS, Inacio MC, Paxton EW. Risk factors associated with surgical site infection in 30,491 primary total hip replacements. *The Journal of bone and joint surgery British volume* 2012; **94**(10): 1330-8.
11. Nakamura T, Kashimura N, Noji T, et al. Triclosan-coated sutures reduce the incidence of wound infections and the costs after colorectal surgery: a randomized controlled trial. *Surgery* 2013; **153**(4): 576-83.
12. Fleck T, Moidl R, Blacky A, et al. Triclosan-coated sutures for the reduction of sternal wound infections: economic considerations. *The Annals of thoracic surgery* 2007; **84**(1): 232-6.
13. Neumayer L, Hosokawa P, Itani K, El-Tamer M, Henderson WG, Khuri SF. Multivariable predictors of postoperative surgical site infection after general and vascular surgery: results from the patient safety in surgery study. *J Am Coll Surg* 2007; **204**(6): 1178-87.
14. Malone DL, Genuit T, Tracy JK, Gannon C, Napolitano LM. Surgical site infections: reanalysis of risk factors. *The Journal of surgical research* 2002; **103**(1): 89-95.
15. Cheadle WG. Risk factors for surgical site infection. *Surg Infect (Larchmt)* 2006; **7 Suppl 1**: S7-11.
16. Katz S, Izhar M, Mirelman D. Bacterial adherence to surgical sutures. A possible factor in suture induced infection. *Ann Surg* 1981; **194**(1): 35-41.
17. Gristina AG, Price JL, Hobgood CD, Webb LX, Costerton JW. Bacterial colonization of percutaneous sutures. *Surgery* 1985; **98**(1): 12-9.
18. Kathju S, Nistico L, Hall-Stoodley L, Post JC, Ehrlich GD, Stoodley P. Chronic surgical site infection due to suture-associated polymicrobial biofilm. *Surg Infect (Larchmt)* 2009; **10**(5): 457-61.
19. Kathju S, Nistico L, Lasko LA, Stoodley P. Bacterial biofilm on monofilament suture and porcine xenograft after inguinal herniorrhaphy. *FEMS immunology and medical microbiology* 2010; **59**(3): 405-9.
20. Kathju S, Nistico L, Tower I, Lasko LA, Stoodley P. Bacterial biofilms on implanted suture material are a cause of surgical site infection. *Surg Infect (Larchmt)* 2014; **15**(5): 592-600.

- 1 21. Darouiche RO, Meade R, Mansouri M, Raad, II. In vivo efficacy of antimicrobial-coated fabric from  
2 prosthetic heart valve sewing rings. *The Journal of heart valve disease* 1998; **7**(6): 639-46.
- 3 22. Blaker JJ, Nazhat SN, Boccaccini AR. Development and characterisation of silver-doped bioactive  
4 glass-coated sutures for tissue engineering and wound healing applications. *Biomaterials* 2004; **25**(7-8):  
5 1319-29.
- 6 23. Storch ML, Rothenburger SJ, Jacinto G. Experimental efficacy study of coated VICRYL plus  
7 antibacterial suture in guinea pigs challenged with *Staphylococcus aureus*. *Surg Infect (Larchmt)* 2004;  
8 **5**(3): 281-8.
- 9 24. Ming X, Rothenburger S, Nichols MM. In vivo and in vitro antibacterial efficacy of PDS plus  
10 (polidioxanone with triclosan) suture. *Surg Infect (Larchmt)* 2008; **9**(4): 451-7.
- 11 25. Rothenburger S, Spangler D, Bhende S, Burkley D. In vitro antimicrobial evaluation of Coated  
12 VICRYL\* Plus Antibacterial Suture (coated polyglactin 910 with triclosan) using zone of inhibition assays.  
13 *Surg Infect (Larchmt)* 2002; **3 Suppl 1**: S79-87.
- 14 26. Marco F, Vallez R, Gonzalez P, Ortega L, de la Lama J, Lopez-Duran L. Study of the efficacy of coated  
15 Vicryl plus antibacterial suture in an animal model of orthopedic surgery. *Surgical infections* 2007; **8**(3):  
16 359-65.
- 17 27. Wang ZX, Jiang CP, Cao Y, Ding YT. Systematic review and meta-analysis of triclosan-coated sutures  
18 for the prevention of surgical-site infection. *The British journal of surgery* 2013; **100**(4): 465-73.
- 19 28. Edmiston CE, Jr., Daoud FC, Leaper D. Is there an evidence-based argument for embracing an  
20 antimicrobial (triclosan)-coated suture technology to reduce the risk for surgical-site infections?: A meta-  
21 analysis. *Surgery* 2013; **154**(1): 89-100.
- 22 29. Sajid MS, Craciunas L, Sains P, Singh K, Baig M. Use of antibacterial sutures for skin closure in  
23 controlling surgical site infections: a systematic review of published randomized, controlled trials.  
24 *Gastroenterol Rep (Oxf)*; 2013: 42-50.
- 25 30. Daoud FC, Edmiston CE, Leaper D. Meta-Analysis of Prevention of Surgical Site Infections following  
26 Incision Closure with Triclosan-Coated Sutures: Robustness to New Evidence. *Surg Infect (Larchmt)*; 2014:  
27 165-81.
- 28 31. Guo J, Pan LH, Li YX, et al. Efficacy of triclosan-coated sutures for reducing risk of surgical site  
29 infection in adults: a meta-analysis of randomized clinical trials. *The Journal of surgical research* 2016;  
30 **201**(1): 105-17.
- 31 32. de Jonge SW, Atema JJ, Solomkin JS, Boermeester MA. Meta-analysis and trial sequential analysis  
32 of triclosan-coated sutures for the prevention of surgical-site infection. *The British journal of surgery* 2017;  
33 **104**(2): e118-e33.
- 34 33. Renko M, Paalanne N, Tapiainen T, et al. Triclosan-containing sutures versus ordinary sutures for  
35 reducing surgical site infections in children: a double-blind, randomised controlled trial. *Lancet Infect Dis*  
36 2017; **17**(1): 50-7.
- 37 34. Sprowson AP, Jensen C, Parsons N, et al. The effect of triclosan-coated sutures on the rate of  
38 surgical site infection after hip and knee arthroplasty: a double-blind randomized controlled trial of 2546  
39 patients. *Bone Joint J* 2018; **100-b**(3): 296-302.
- 40 35. Moher D, Liberati A, Tetzlaff J, Altman DG. Preferred reporting items for systematic reviews and  
41 meta-analyses: the PRISMA statement. *PLoS medicine* 2009; **6**(7): e1000097.
- 42 36. Green S, Higgins J. Cochrane handbook for systematic reviews of interventions. Version; 2005.
- 43 37. Guyatt GH, Oxman AD, Vist GE, et al. GRADE: an emerging consensus on rating quality of evidence  
44 and strength of recommendations. *BMJ* 2008; **336**(7650): 924-6.
- 45 38. Baracs J, Huszar O, Sajjadi SG, Horvath OP. Surgical site infections after abdominal closure in  
46 colorectal surgery using triclosan-coated absorbable suture (PDS Plus) vs. uncoated sutures (PDS II): a  
47 randomized multicenter study. *Surg Infect (Larchmt)* 2011; **12**(6): 483-9.
- 48 39. Chen SY, Chen TM, Dai NT, et al. Do antibacterial-coated sutures reduce wound infection in head  
49 and neck cancer reconstruction? *European journal of surgical oncology : the journal of the European*  
50 *Society of Surgical Oncology and the British Association of Surgical Oncology* 2011; **37**(4): 300-4.

- 1 40. Ford HR, Jones P, Gaines B, Reblock K, Simpkins DL. Intraoperative handling and wound healing:  
2 controlled clinical trial comparing coated VICRYL plus antibacterial suture (coated polyglactin 910 suture  
3 with triclosan) with coated VICRYL suture (coated polyglactin 910 suture). *Surgical infections* 2005; **6**(3):  
4 313-21.
- 5 41. Galal I, El-Hindawy K. Impact of using triclosan-antibacterial sutures on incidence of surgical site  
6 infection. *American journal of surgery* 2011; **202**(2): 133-8.
- 7 42. Ichida K, Noda H, Kikugawa R, et al. Effect of triclosan-coated sutures on the incidence of surgical  
8 site infection after abdominal wall closure in gastroenterological surgery: a double-blind, randomized  
9 controlled trial in a single center. *Surgery* 2018.
- 10 43. Isik I, Selimen D, Senay S, Alhan C. Efficiency of antibacterial suture material in cardiac surgery: a  
11 double-blind randomized prospective study. *The heart surgery forum* 2012; **15**(1): E40-5.
- 12 44. Justinger C, Slotta JE, Ningel S, Graber S, Kollmar O, Schilling MK. Surgical-site infection after  
13 abdominal wall closure with triclosan-impregnated polydioxanone sutures: results of a randomized  
14 clinical pathway facilitated trial (NCT00998907). *Surgery* 2013; **154**(3): 589-95.
- 15 45. Karip AB, Celik K, Aydin T, et al. Effect of Triclosan-Coated Suture and Antibiotic Prophylaxis on  
16 Infection and Recurrence after Karydakias Flap Repair for Pilonidal Disease: A Randomized Parallel-Arm  
17 Double-Blinded Clinical Trial. *Surg Infect (Larchmt)* 2016; **17**(5): 583-8.
- 18 46. Mingmalairak C, Ungbhakorn P, Paocharoen V. Efficacy of antimicrobial coating suture coated  
19 polyglactin 910 with triclosan (Vicryl plus) compared with polyglactin 910 (Vicryl) in reduced surgical site  
20 infection of appendicitis, double blind randomized control trial, preliminary safety report. *Journal of the  
21 Medical Association of Thailand = Chotmaihet thangphaet* 2009; **92**(6): 770-5.
- 22 47. Rasic Z, Schwarz D, Adam VN, et al. Efficacy of antimicrobial triclosan-coated polyglactin 910  
23 (Vicryl\* Plus) suture for closure of the abdominal wall after colorectal surgery. *Collegium antropologicum*  
24 2011; **35**(2): 439-43.
- 25 48. Ruiz-Tovar J, Alonso N, Morales V, Llaveró C. Association between Triclosan-Coated Sutures for  
26 Abdominal Wall Closure and Incisional Surgical Site Infection after Open Surgery in Patients Presenting  
27 with Fecal Peritonitis: A Randomized Clinical Trial. *Surg Infect (Larchmt)* 2015; **16**(5): 588-94.
- 28 49. Seim BE, Tonnessen T, Woldbaek PR. Triclosan-coated sutures do not reduce leg wound infections  
29 after coronary artery bypass grafting. *Interact Cardiovasc Thorac Surg* 2012; **15**(3): 411-5.
- 30 50. Thimour-Bergstrom L, Roman-Emanuel C, Schersten H, Friberg O, Gudbjartsson T, Jeppsson A.  
31 Triclosan-coated sutures reduce surgical site infection after open vein harvesting in coronary artery  
32 bypass grafting patients: a randomized controlled trial. *European journal of cardio-thoracic surgery :  
33 official journal of the European Association for Cardio-thoracic Surgery* 2013; **44**(5): 931-8.
- 34 51. Turtiainen J, Saimanen EI, Makinen KT, et al. Effect of triclosan-coated sutures on the incidence of  
35 surgical wound infection after lower limb revascularization surgery: a randomized controlled trial. *World  
36 journal of surgery* 2012; **36**(10): 2528-34.
- 37 52. Williams N, Sweetland H, Goyal S, Ivins N, Leaper DJ. Randomized trial of antimicrobial-coated  
38 sutures to prevent surgical site infection after breast cancer surgery. *Surg Infect (Larchmt)* 2011; **12**(6):  
39 469-74.
- 40 53. Zhang ZT, Zhang HW, Fang XD, et al. Cosmetic outcome and surgical site infection rates of  
41 antibacterial absorbable (Polyglactin 910) suture compared to Chinese silk suture in breast cancer surgery:  
42 a randomized pilot research. *Chin Med J (Engl)* 2011; **124**(5): 719-24.
- 43 54. Tabrizi R, Mohajerani H, Bozorgmehr F. Polyglactin 910 suture compared with polyglactin 910  
44 coated with triclosan in dental implant surgery: randomized clinical trial. *International Journal of Oral and  
45 Maxillofacial Surgery* 2019.
- 46 55. Roy PK, Kalita P, Lahlhenmawia H, et al. Comparison of surgical site infection rate between  
47 antibacterial coated surgical suture and conventional suture: A randomized controlled single centre study  
48 for preventive measure of postoperative infection. *International Journal of Pharmaceutical Sciences and  
49 Research* 2019; **10**(5): 2385-91.
- 50  
51  
52  
53  
54  
55  
56  
57  
58  
59  
60



- 1 56. Lin SJ, Chang FC, Huang TW, Peng KT, Shih HN, Lee MS. Temporal Change of Interleukin-6, C-  
2 Reactive Protein, and Skin Temperature after Total Knee Arthroplasty Using Triclosan-Coated Sutures.  
3 *BioMed Research International* 2018; **2018**: 9136208.
- 4 57. Arslan NC, Atasoy G, Altintas T, Terzi C. Effect of triclosan-coated sutures on surgical site infections  
5 in pilonidal disease: prospective randomized study. *International Journal of Colorectal Disease* 2018;  
6 **33**(10): 1445-52.
- 7 58. Sprowson AP, Jensen C, Parsons N, et al. The effect of triclosan-coated sutures on the rate of  
8 surgical site infection after hip and knee arthroplasty: a double-blind randomized controlled trial of 2546  
9 patients. *Bone & Joint Journal* 2018; **100-B**(3): 296-302.
- 10 59. Apisarnthanarak A, Singh N, Bandong AN, Madriaga G. Triclosan-coated sutures reduce the risk of  
11 surgical site infections: a systematic review and meta-analysis. *Infection Control & Hospital Epidemiology*  
12 2015; **36**(2): 169-79.
- 13 60. Wu X, Kubilay NZ, Ren J, et al. Antimicrobial-coated sutures to decrease surgical site infections: a  
14 systematic review and meta-analysis. *European Journal of Clinical Microbiology & Infectious Diseases*  
15 2017; **36**(1): 19-32.
- 16 61. Henriksen NA, Deerenberg EB, Venclauskas L, et al. Triclosan-coated sutures and surgical site  
17 infection in abdominal surgery: the TRISTAN review, meta-analysis and trial sequential analysis. *Hernia*  
18 2017; **21**(6): 833-41.
- 19 62. Konstantelias AA, Andriakopoulou CS, Mourgela S. Triclosan-coated sutures for the prevention of  
20 surgical-site infections: a meta-analysis. *Acta Chirurgica Belgica* 2017; **117**(3): 137-48.
- 21 63. Leaper DJ, Edmiston CE, Jr., Holy CE. Meta-analysis of the potential economic impact following  
22 introduction of absorbable antimicrobial sutures. *British Journal of Surgery* 2017; **104**(2): e134-e44.
- 23 64. Sandini M, Mattavelli I, Nespoli L, Uggeri F, Gianotti L. Systematic review and meta-analysis of  
24 sutures coated with triclosan for the prevention of surgical site infection after elective colorectal surgery  
25 according to the PRISMA statement. *Medicine* 2016; **95**(35): e4057.
- 26 65. Konstantelias AA, Andriakopoulou CS, Mourgela S. Triclosan-coated sutures for the prevention of  
27 surgical-site infections: a meta-analysis. *Acta Chir Belg* 2017; **117**(3): 137-48.
- 28 66. Higgins JP, Altman DG, Gotzsche PC, et al. The Cochrane Collaboration's tool for assessing risk of  
29 bias in randomised trials. *Bmj* 2011; **343**: d5928.
- 30 67. Hawn MT, Richman JS, Vick CC, et al. Timing of surgical antibiotic prophylaxis and the risk of  
31 surgical site infection. *JAMA surgery* 2013; **148**(7): 649-57.
- 32 68. Blam OG, Vaccaro AR, Vanichkachorn JS, et al. Risk factors for surgical site infection in the patient  
33 with spinal injury. *Spine (Phila Pa 1976)* 2003; **28**(13): 1475-80.
- 34  
35  
36  
37  
38  
39  
40  
41  
42  
43  
44  
45  
46  
47  
48  
49  
50  
51  
52  
53  
54  
55  
56  
57  
58  
59  
60

1  
2  
3  
4  
5  
6  
7  
8  
9  
10  
11  
12  
13  
14  
15  
16  
17  
18  
19  
20  
21  
22  
23  
24  
25  
26  
27  
28  
29  
30  
31  
32  
33  
34  
35  
36  
37  
38  
39  
40  
41  
42  
43  
44  
45  
46  
47  
48  
49  
50  
51  
52  
53  
54  
55  
56  
57  
58  
59  
60

For peer review only

| Study             | No. of participants | No. of centres | Surgery type                                               | Sutures used                                                              | SSI criteria                                                               | Duration of follow-up        | Routine prophylactic antibiotics? |
|-------------------|---------------------|----------------|------------------------------------------------------------|---------------------------------------------------------------------------|----------------------------------------------------------------------------|------------------------------|-----------------------------------|
| Arslan 2018       | 177                 | 1              | Surgery for pilonidal disease                              | Vicryl vs Vicryl plus                                                     | CDC criteria                                                               | 30 days                      | Yes                               |
| Baracs 2011       | 385                 | 7              | Elective colorectal surgery                                | PDS vs PDS Plus                                                           | Not stated                                                                 | 30 days                      | Yes                               |
| Chen 2011         | 241                 | 1              | Head and neck surgery                                      | Vicryl vs Vicryl Plus                                                     | Local erythema with purulent discharge, wound dehiscence, or skin necrosis | Not stated                   | Yes                               |
| Diener 2014       | 1185                | 24             | Laparotomy                                                 | PDS vs PDS Plus                                                           | CDC criteria                                                               | 30 days                      | Yes                               |
| Ford 2005         | 147                 | 1              | Paediatric general surgery                                 | Vicryl vs Vicryl Plus                                                     | Not stated                                                                 | 80 days                      | No                                |
| Galal 2011        | 450                 | 1              | All surgery                                                | Vicryl vs Vicryl Plus                                                     | CDC criteria                                                               | 30 days                      | Not stated                        |
| Ichida 2018       | 1023                | 1              | Gastroenterologic surgery                                  | Vicryl and PDS II vs Vicryl Plus and PDS Plus                             | CDC criteria                                                               | 30 days                      | Yes                               |
| Isik 2011         | 510                 | 1              | Cardiac surgery                                            | Vicryl vs Vicryl Plus                                                     | CDC criteria                                                               | 1 month                      | Not stated                        |
| Justinger 2013    | 856                 | 1              | Laparotomy                                                 | PDS II vs PDS II Plus                                                     | CDC criteria                                                               | 2 weeks                      | Yes                               |
| Karip 2016        | 106                 | 1              | Pilonidal sinus excision followed by Karydakis flap repair | Monocryl Plus vs Monocryl                                                 | Rash, fever or purulent discharge                                          | 2 weeks                      | Yes                               |
| Lin 2018          | 102                 | 1              | Total knee replacement surgery                             | Vicryl vs Vicryl plus                                                     | CDC criteria                                                               | 30 days                      | Yes                               |
| Mattavelli 2015   | 300                 | 4              | Elective colorectal surgery                                | Vicryl and PDS vs Vicryl Plus and PDS Plus                                | CDC criteria                                                               | 30 days                      | Yes                               |
| Mingmalairak 2009 | 100                 | 1              | Appendectomy                                               | Vicryl vs Vicryl Plus                                                     | Not stated                                                                 | 30 days, 6 months and 1 year | Yes                               |
| Nakamura 2013     | 410                 | 1              | Elective colorectal surgery                                | Vicryl vs Vicryl Plus                                                     | CDC criteria                                                               | 30 days                      | Yes                               |
| Rasic 2011        | 184                 | 1              | Elective colorectal cancer surgery                         | Vicryl vs Vicryl Plus                                                     | Not stated                                                                 | To discharge                 | Yes                               |
| Renko 2017        | 1633                | 1              | Paediatric surgery                                         | Vicryl and Monocryl and PDS vs Vicryl Plus and Monocryl Plus and PDS Plus | CDC criteria                                                               | 30 days                      | In 30%                            |
| Roy 2019          | 110                 | 1              | Gastrointestinal surgery                                   | PDS vs PDS plus                                                           | CDC criteria                                                               | 30 days                      | Yes                               |

|                               |      |   |                                                    |                                                            |                                                         |         |                          |
|-------------------------------|------|---|----------------------------------------------------|------------------------------------------------------------|---------------------------------------------------------|---------|--------------------------|
| Ruiz-Tovar<br>2015            | 110  | 3 | Open colorectal surgery<br>with faecal peritonitis | Vicryl vs Vicryl Plus                                      | CDC criteria                                            | 60 days | Yes                      |
| Seim 2012                     | 328  | 1 | CABG leg wound                                     | Vicryl vs Vicryl Plus                                      | Positive bacterial<br>culture and clinical<br>judgement | 4 weeks | Yes                      |
| Sprowson<br>2018              | 2546 | 3 | Primary THR or TKR                                 | Vicryl vs Vicryl Plus                                      | CDC criteria                                            | 30 days | Yes                      |
| Tabrizi 2018                  | 320  | 2 | Dental implant surgery                             | Vicryl vs Vicryl plus                                      | CDC criteria                                            | 30 days | Yes                      |
| Thimour-<br>Bergstrom<br>2013 | 392  | 1 | CABG (+/-AVR, MVR) with<br>saphenous vein graft    | Vicryl and Monocryl vs<br>Vicryl Plus and Monocryl<br>Plus | CDC criteria                                            | 60 days | Yes                      |
| Turtiainen<br>2012            | 276  | 3 | Non-emergency lower-limb<br>arterial surgery       | Vicryl and Monocryl vs<br>Vicryl Plus and Monocryl<br>Plus | CDC criteria                                            | 30 days | Yes                      |
| Williams 2011                 | 150  | 1 | Mastectomy                                         | Vicryl and Monocryl vs<br>Vicryl Plus and Monocryl<br>Plus | CDC criteria                                            | 6 weeks | If considered<br>at risk |
| Zhang 2011                    | 101  | 6 | Mastectomy                                         | Chinese silk vs Vicryl Plus                                | CDC criteria                                            | 30 days | Not stated               |

Table 1: Study characteristics of included RCTs in this review

| Author              | Date | Journal                                     | Number of studies         | Number of participants | Findings                                                                                                                                                                                                                                                     | Risk of bias | Grade        |
|---------------------|------|---------------------------------------------|---------------------------|------------------------|--------------------------------------------------------------------------------------------------------------------------------------------------------------------------------------------------------------------------------------------------------------|--------------|--------------|
| Wang et al          | 2013 | British Journal of Surgery                  | 17                        | 3720                   | Triclosan coated sutures significantly reduced SSI rate compared to standard sutures. RR 0.7 (95% CI 0.57, 0.85).<br>Triclosan coated sutures significantly reduced SSI rate in 'clean' and 'clean-contaminated' surgery.                                    | Included     | Not included |
| Edmiston et al      | 2013 | Surgery                                     | 13                        | 3568                   | Triclosan coated sutures significantly reduced SSI rate compared to standard suture. RR 0.734 (95% CI 0.59, 0.91).<br>No subgroup analysis was performed.                                                                                                    | Not included | Not included |
| Daoud et al         | 2014 | Surgical infections                         | 15                        | 4800                   | Triclosan coated sutures significantly reduced SSI rate compared to standard sutures. RR 0.67 (95% 0.54, 0.84).<br>No subgroup analysis was performed.                                                                                                       | Not included | Not included |
| Apisarntharak et al | 2015 | Infection Control and Hospital Epidemiology | 29 (22 RCT and 7 non-RCT) | 11942                  | Triclosan coated sutures significantly reduced SSI rate compared to standard suture. RR 0.65 (95% CI 0.549, 0.769). RR for RCT alone 0.74 (95% CI 0.61, 0.89).<br>Triclosan coated sutures significantly reduced SSI rate for all CDC wound classifications. | Not included | Not included |

|    |               |      |                                                                    |                                                           |      |                                                                                                                                                                                                                                                                                                              |          |              |
|----|---------------|------|--------------------------------------------------------------------|-----------------------------------------------------------|------|--------------------------------------------------------------------------------------------------------------------------------------------------------------------------------------------------------------------------------------------------------------------------------------------------------------|----------|--------------|
| 1  |               |      |                                                                    |                                                           |      |                                                                                                                                                                                                                                                                                                              |          |              |
| 2  |               |      |                                                                    |                                                           |      |                                                                                                                                                                                                                                                                                                              |          |              |
| 3  | Guo et al     | 2015 | Journal of Surgical<br>Research                                    | 13                                                        | 5256 | Triclosan coated sutures significantly reduced risk of SSI compared to standard suture. RR 0.76 (95% CI 0.65, 0.88).<br><br>Triclosan coated sutures significantly reduced risk of SSI in abdominal surgery. RR 0.70 (95% CI 0.63, 0.99). There was no significant difference in cardiac and breast surgery. | Included | Not included |
| 4  |               |      |                                                                    |                                                           |      |                                                                                                                                                                                                                                                                                                              |          |              |
| 5  |               |      |                                                                    |                                                           |      |                                                                                                                                                                                                                                                                                                              |          |              |
| 6  |               |      |                                                                    |                                                           |      |                                                                                                                                                                                                                                                                                                              |          |              |
| 7  |               |      |                                                                    |                                                           |      |                                                                                                                                                                                                                                                                                                              |          |              |
| 8  |               |      |                                                                    |                                                           |      |                                                                                                                                                                                                                                                                                                              |          |              |
| 9  |               |      |                                                                    |                                                           |      |                                                                                                                                                                                                                                                                                                              |          |              |
| 10 |               |      |                                                                    |                                                           |      |                                                                                                                                                                                                                                                                                                              |          |              |
| 11 |               |      |                                                                    |                                                           |      |                                                                                                                                                                                                                                                                                                              |          |              |
| 12 |               |      |                                                                    |                                                           |      |                                                                                                                                                                                                                                                                                                              |          |              |
| 13 |               |      |                                                                    |                                                           |      |                                                                                                                                                                                                                                                                                                              |          |              |
| 14 |               |      |                                                                    |                                                           |      |                                                                                                                                                                                                                                                                                                              |          |              |
| 15 |               |      |                                                                    |                                                           |      |                                                                                                                                                                                                                                                                                                              |          |              |
| 16 |               |      |                                                                    |                                                           |      |                                                                                                                                                                                                                                                                                                              |          |              |
| 17 | Sandini et al | 2016 | Medicine                                                           | 6 (only<br>included<br>elective<br>colorectal<br>surgery) | 2168 | Triclosan coated sutures did not significantly reduce the risk of SSI compared to standard sutures in elective colorectal surgery. OR 0.81 (95% CI 0.58, 1.13)                                                                                                                                               | Included | Not included |
| 18 |               |      |                                                                    |                                                           |      |                                                                                                                                                                                                                                                                                                              |          |              |
| 19 |               |      |                                                                    |                                                           |      |                                                                                                                                                                                                                                                                                                              |          |              |
| 20 |               |      |                                                                    |                                                           |      |                                                                                                                                                                                                                                                                                                              |          |              |
| 21 |               |      |                                                                    |                                                           |      |                                                                                                                                                                                                                                                                                                              |          |              |
| 22 |               |      |                                                                    |                                                           |      |                                                                                                                                                                                                                                                                                                              |          |              |
| 23 |               |      |                                                                    |                                                           |      |                                                                                                                                                                                                                                                                                                              |          |              |
| 24 |               |      |                                                                    |                                                           |      |                                                                                                                                                                                                                                                                                                              |          |              |
| 25 |               |      |                                                                    |                                                           |      |                                                                                                                                                                                                                                                                                                              |          |              |
| 26 |               |      |                                                                    |                                                           |      |                                                                                                                                                                                                                                                                                                              |          |              |
| 27 |               |      |                                                                    |                                                           |      |                                                                                                                                                                                                                                                                                                              |          |              |
| 28 | Wu et al      | 2017 | European Journal<br>of Microbiology<br>and Infectious<br>Disorders | 18 (13 RCTs<br>and 5 non<br>RCTs)                         | 7458 | Triclosan coated sutures significantly reduced risk of SSI compared to standard suture in both the RCTs (OR 0.72; 95% CI 0.59, 0.88) and the non- RCTs (OR 0.58; 95% CI 0.40, 0.83). Triclosan coated sutures significantly reduced the risk of SSIS in clean surgery.                                       | Included | Included     |
| 29 |               |      |                                                                    |                                                           |      |                                                                                                                                                                                                                                                                                                              |          |              |
| 30 |               |      |                                                                    |                                                           |      |                                                                                                                                                                                                                                                                                                              |          |              |
| 31 |               |      |                                                                    |                                                           |      |                                                                                                                                                                                                                                                                                                              |          |              |
| 32 |               |      |                                                                    |                                                           |      |                                                                                                                                                                                                                                                                                                              |          |              |
| 33 |               |      |                                                                    |                                                           |      |                                                                                                                                                                                                                                                                                                              |          |              |
| 34 |               |      |                                                                    |                                                           |      |                                                                                                                                                                                                                                                                                                              |          |              |
| 35 |               |      |                                                                    |                                                           |      |                                                                                                                                                                                                                                                                                                              |          |              |
| 36 |               |      |                                                                    |                                                           |      |                                                                                                                                                                                                                                                                                                              |          |              |
| 37 |               |      |                                                                    |                                                           |      |                                                                                                                                                                                                                                                                                                              |          |              |
| 38 |               |      |                                                                    |                                                           |      |                                                                                                                                                                                                                                                                                                              |          |              |
| 39 |               |      |                                                                    |                                                           |      |                                                                                                                                                                                                                                                                                                              |          |              |
| 40 |               |      |                                                                    |                                                           |      |                                                                                                                                                                                                                                                                                                              |          |              |
| 41 |               |      |                                                                    |                                                           |      |                                                                                                                                                                                                                                                                                                              |          |              |
| 42 |               |      |                                                                    |                                                           |      |                                                                                                                                                                                                                                                                                                              |          |              |
| 43 |               |      |                                                                    |                                                           |      |                                                                                                                                                                                                                                                                                                              |          |              |
| 44 |               |      |                                                                    |                                                           |      |                                                                                                                                                                                                                                                                                                              |          |              |
| 45 |               |      |                                                                    |                                                           |      |                                                                                                                                                                                                                                                                                                              |          |              |
| 46 |               |      |                                                                    |                                                           |      |                                                                                                                                                                                                                                                                                                              |          |              |

|    |                     |      |                                 |                                                                           |       |                                                                                                                                                                                                                                                     |              |              |
|----|---------------------|------|---------------------------------|---------------------------------------------------------------------------|-------|-----------------------------------------------------------------------------------------------------------------------------------------------------------------------------------------------------------------------------------------------------|--------------|--------------|
| 1  | De Jonge et al      | 2017 | British Journal of<br>Surgery   | 21                                                                        | 6462  | Triclosan coated sutures significantly reduced risk of SSI compared to standard suture. RR 0.72 (95% CI 0.60, 0.86).                                                                                                                                | Included     | Not included |
| 2  |                     |      |                                 |                                                                           |       |                                                                                                                                                                                                                                                     |              |              |
| 3  |                     |      |                                 |                                                                           |       |                                                                                                                                                                                                                                                     |              |              |
| 4  |                     |      |                                 |                                                                           |       |                                                                                                                                                                                                                                                     |              |              |
| 5  | Leaper et al        | 2017 | British Journal of<br>Surgery   | 34 (20 RCTs<br>and 14 non-<br>RCTs)                                       | 16762 | Triclosan coated sutures significantly reduced risk of SSI compared to standard sutures. OR 0.61 (95% CI 0.52, 0.73).<br><br>No significant difference in SSI rate for 'contaminated' or 'dirty' wounds                                             | Not included | Not included |
| 6  |                     |      |                                 |                                                                           |       |                                                                                                                                                                                                                                                     |              |              |
| 7  |                     |      |                                 |                                                                           |       |                                                                                                                                                                                                                                                     |              |              |
| 8  |                     |      |                                 |                                                                           |       |                                                                                                                                                                                                                                                     |              |              |
| 9  |                     |      |                                 |                                                                           |       |                                                                                                                                                                                                                                                     |              |              |
| 10 |                     |      |                                 |                                                                           |       |                                                                                                                                                                                                                                                     |              |              |
| 11 |                     |      |                                 |                                                                           |       |                                                                                                                                                                                                                                                     |              |              |
| 12 |                     |      |                                 |                                                                           |       |                                                                                                                                                                                                                                                     |              |              |
| 13 |                     |      |                                 |                                                                           |       |                                                                                                                                                                                                                                                     |              |              |
| 14 |                     |      |                                 |                                                                           |       |                                                                                                                                                                                                                                                     |              |              |
| 15 |                     |      |                                 |                                                                           |       |                                                                                                                                                                                                                                                     |              |              |
| 16 |                     |      |                                 |                                                                           |       |                                                                                                                                                                                                                                                     |              |              |
| 17 | Konstantelias et al | 2017 | Acta Chirurgica<br>Belgica 2017 | 30 (19 RCTs<br>and 11 non-<br>RCTs)                                       | 15385 | Triclosan coated sutures significantly reduced risk of SSI compared to standard suture. RR 0.68 (95% CI 0.57, 0.81).<br><br>Triclosan coated sutures significantly reduced risk of SSI in 'clean', 'clean-contaminated' and 'contaminated surgery.' | Not included | Not included |
| 18 |                     |      |                                 |                                                                           |       |                                                                                                                                                                                                                                                     |              |              |
| 19 |                     |      |                                 |                                                                           |       |                                                                                                                                                                                                                                                     |              |              |
| 20 |                     |      |                                 |                                                                           |       |                                                                                                                                                                                                                                                     |              |              |
| 21 |                     |      |                                 |                                                                           |       |                                                                                                                                                                                                                                                     |              |              |
| 22 |                     |      |                                 |                                                                           |       |                                                                                                                                                                                                                                                     |              |              |
| 23 |                     |      |                                 |                                                                           |       |                                                                                                                                                                                                                                                     |              |              |
| 24 |                     |      |                                 |                                                                           |       |                                                                                                                                                                                                                                                     |              |              |
| 25 |                     |      |                                 |                                                                           |       |                                                                                                                                                                                                                                                     |              |              |
| 26 |                     |      |                                 |                                                                           |       |                                                                                                                                                                                                                                                     |              |              |
| 27 |                     |      |                                 |                                                                           |       |                                                                                                                                                                                                                                                     |              |              |
| 28 | Henriksen et al     | 2017 | Hernia                          | 8 (only<br>included<br>studies<br>reporting<br>abdominal<br>wall closure) | 3641  | Triclosan coated sutures significantly reduced risk of SSI compared to standard suture in abdominal wall closure.<br><br>OR 0.67 (95% CI 0.46, 0.98).                                                                                               | Not included | Not included |
| 29 |                     |      |                                 |                                                                           |       |                                                                                                                                                                                                                                                     |              |              |
| 30 |                     |      |                                 |                                                                           |       |                                                                                                                                                                                                                                                     |              |              |
| 31 |                     |      |                                 |                                                                           |       |                                                                                                                                                                                                                                                     |              |              |
| 32 |                     |      |                                 |                                                                           |       |                                                                                                                                                                                                                                                     |              |              |
| 33 |                     |      |                                 |                                                                           |       |                                                                                                                                                                                                                                                     |              |              |
| 34 |                     |      |                                 |                                                                           |       |                                                                                                                                                                                                                                                     |              |              |
| 35 |                     |      |                                 |                                                                           |       |                                                                                                                                                                                                                                                     |              |              |
| 36 |                     |      |                                 |                                                                           |       |                                                                                                                                                                                                                                                     |              |              |
| 37 |                     |      |                                 |                                                                           |       |                                                                                                                                                                                                                                                     |              |              |
| 38 |                     |      |                                 |                                                                           |       |                                                                                                                                                                                                                                                     |              |              |
| 39 |                     |      |                                 |                                                                           |       |                                                                                                                                                                                                                                                     |              |              |
| 40 |                     |      |                                 |                                                                           |       |                                                                                                                                                                                                                                                     |              |              |
| 41 |                     |      |                                 |                                                                           |       |                                                                                                                                                                                                                                                     |              |              |
| 42 |                     |      |                                 |                                                                           |       |                                                                                                                                                                                                                                                     |              |              |
| 43 |                     |      |                                 |                                                                           |       |                                                                                                                                                                                                                                                     |              |              |
| 44 |                     |      |                                 |                                                                           |       |                                                                                                                                                                                                                                                     |              |              |
| 45 |                     |      |                                 |                                                                           |       |                                                                                                                                                                                                                                                     |              |              |
| 46 |                     |      |                                 |                                                                           |       |                                                                                                                                                                                                                                                     |              |              |

1  
2  
3 Table 2: A summary of previous systematic reviews on this topic area highlighting number of studies, number of participants and key findings.  
4  
5  
6  
7  
8  
9  
10  
11  
12  
13  
14  
15  
16  
17  
18  
19  
20  
21  
22  
23  
24  
25  
26  
27  
28  
29  
30  
31  
32  
33  
34  
35  
36  
37  
38  
39  
40  
41  
42  
43  
44  
45  
46

For peer review only



1  
2  
3  
4  
5  
6  
7  
8  
9  
10  
11  
12  
13  
14  
15  
16  
17  
18  
19  
20  
21  
22  
23  
24  
25  
26  
27  
28  
29  
30  
31  
32  
33  
34  
35  
36  
37  
38  
39  
40  
41  
42  
43  
44  
45  
46  
47  
48  
49  
50  
51  
52  
53  
54  
55  
56  
57  
58  
59  
60

For peer review only

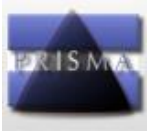

**Figure 1: PRISMA flow diagram of search results**

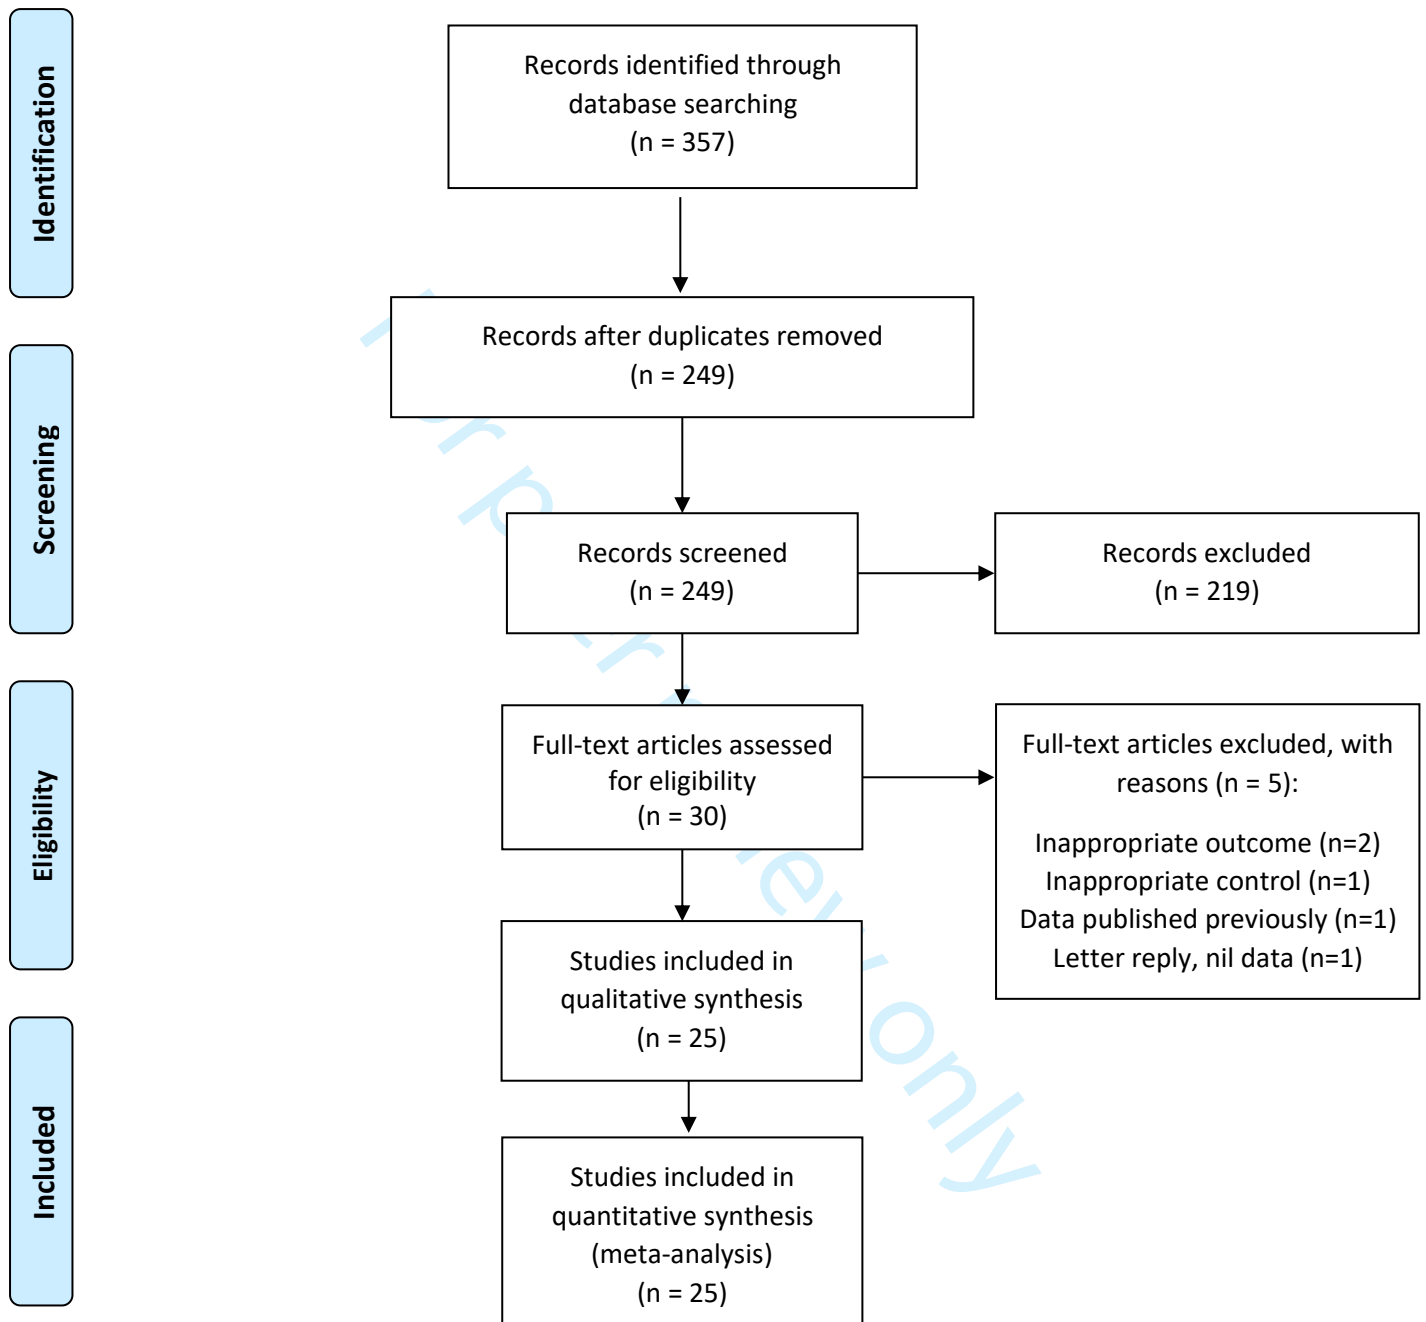

1  
2  
3  
4  
5  
6  
7  
8  
9  
10  
11  
12  
13  
14  
15  
16  
17  
18  
19  
20  
21  
22  
23  
24  
25  
26  
27  
28  
29  
30  
31  
32  
33  
34  
35  
36  
37  
38  
39  
40  
41  
42  
43  
44  
45  
46  
47  
48  
49  
50  
51  
52  
53  
54  
55  
56  
57  
58  
59  
60

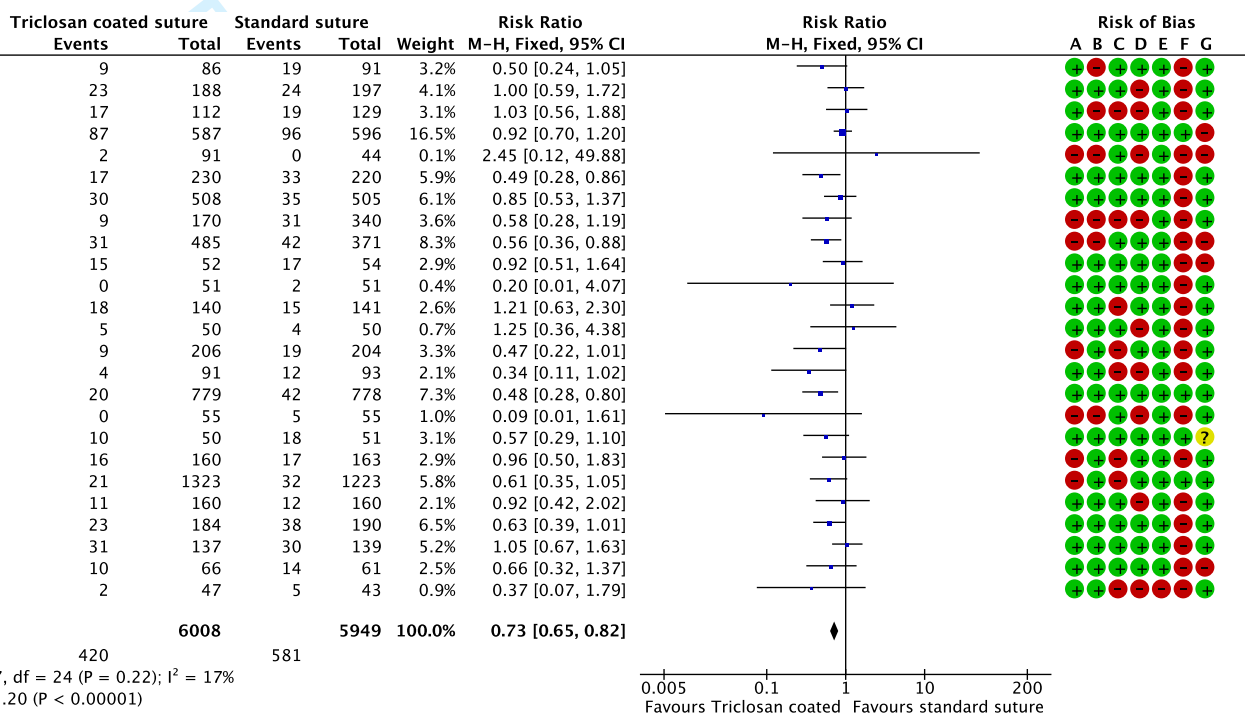

Risk of bias legend

- (A) Random sequence generation (selection bias)
- (B) Allocation concealment (selection bias)
- (C) Blinding of participants and personnel (performance bias)
- (D) Blinding of outcome assessment (detection bias)
- (E) Incomplete outcome data (attrition bias)
- (F) Selective reporting (reporting bias)
- (G) Other bias

1  
2  
3  
4  
5  
6  
7  
8  
9  
10  
11  
12  
13  
14  
15  
16  
17  
18  
19  
20  
21  
22  
23  
24  
25  
26  
27  
28  
29  
30  
31  
32  
33  
34  
35  
36  
37  
38  
39  
40  
41  
42  
43  
44  
45  
46  
47  
48  
49  
50  
51  
52  
53  
54  
55  
56  
57  
58  
59  
60



1  
2  
3  
4  
5  
6  
7  
8  
9

10

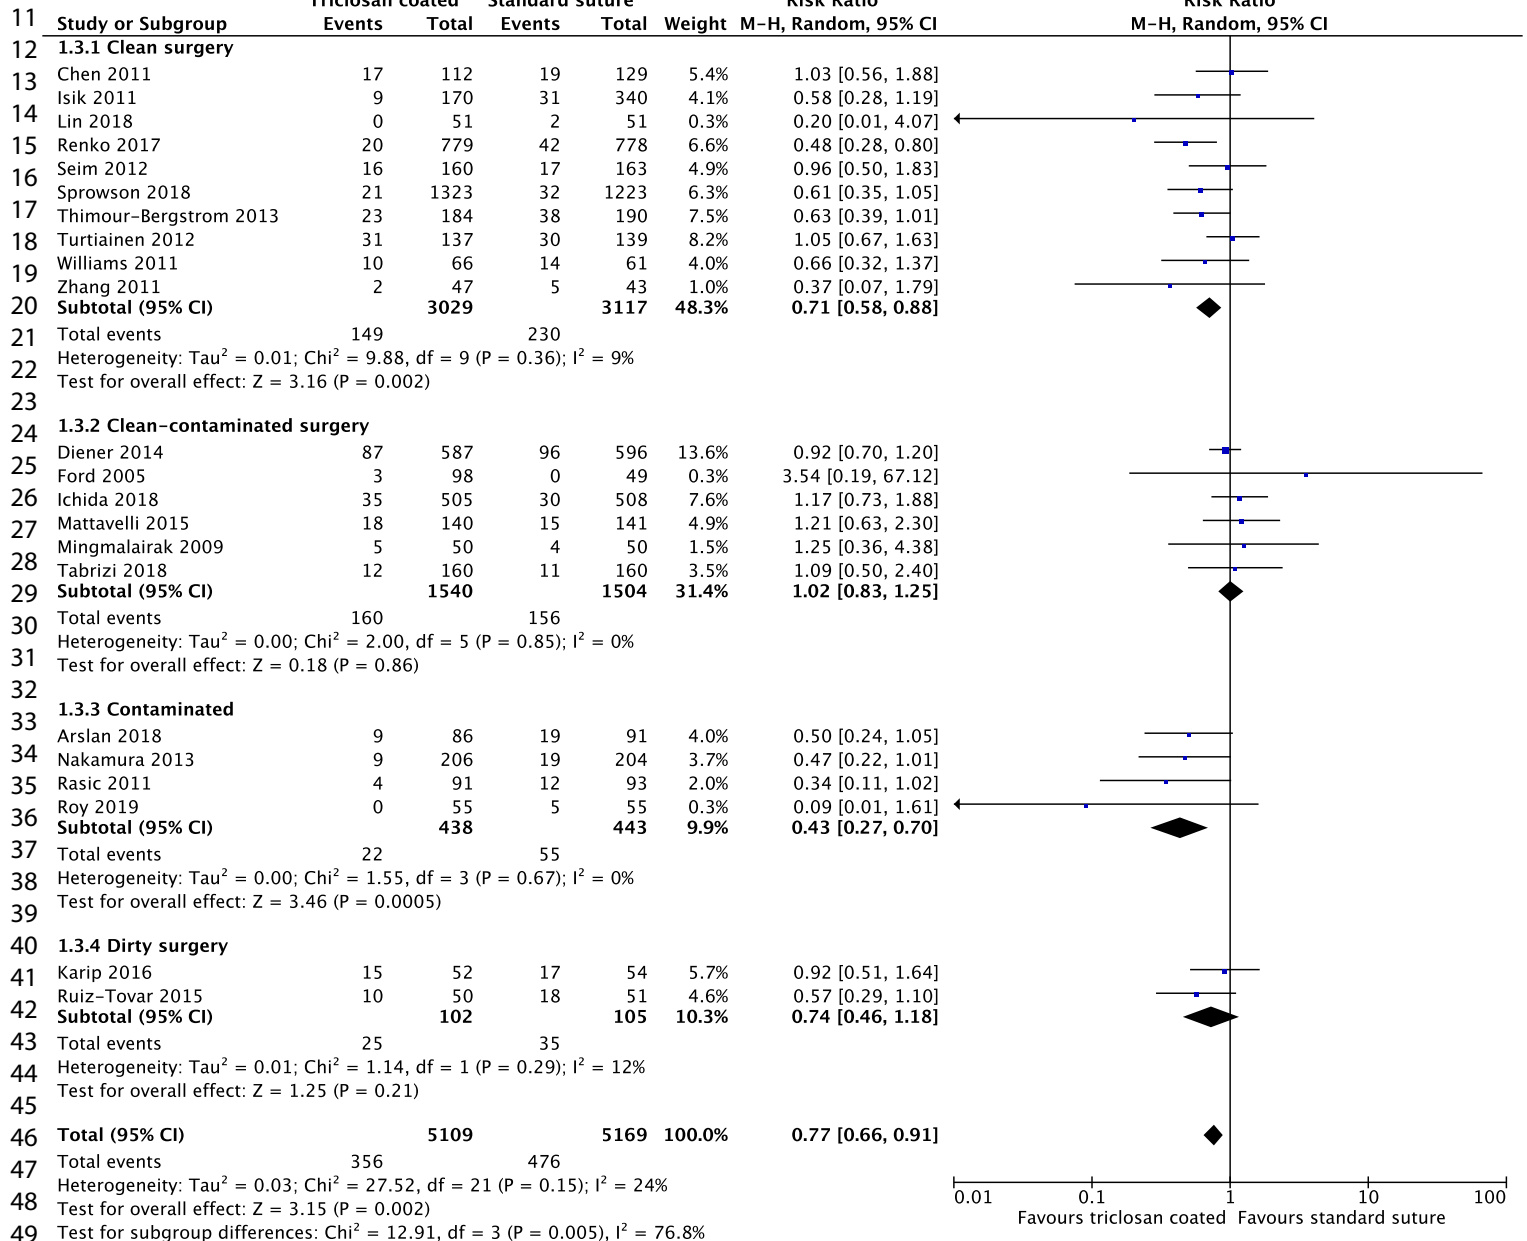

50

51

52

53

54

55

56

57

58

59

60

1  
2  
3  
4  
5  
6  
7  
8  
9  
10  
11  
12  
13  
14  
15  
16  
17  
18  
19  
20  
21  
22  
23  
24  
25  
26  
27  
28  
29  
30  
31  
32  
33  
34  
35  
36  
37  
38  
39  
40  
41  
42  
43  
44  
45  
46  
47  
48  
49  
50  
51  
52  
53  
54  
55  
56  
57  
58  
59  
60



Supplementary file 1. Demonstrating the full search strategy and the number of results for each search term. The search was performed on the 31<sup>st</sup> May 2019.

Database: AMED (Allied and Complementary Medicine) <1985 to May 2019>, Ovid MEDLINE(R) <1946 to May Week 4 2019>, Embase <1974 to 2019 May 30>

Search Strategy:

-----  
1 triclosan.mp. (8754)  
2 anti-bacterial agents.mp. (315458)  
3 anti-infective agents, local.mp. (16419)  
4 coated materials, biocompatible.mp. (13821)  
5 biomimetic material.mp. (0)  
6 1 or 2 or 3 or 4 or 5 (350648)  
7 sutures.mp. (61707)  
8 vicryl plus.mp. (129)  
9 monocryl plus.mp. (20)  
10 PDS plus.mp. (47)  
11 7 or 8 or 9 or 10 (61743)  
12 surgical site infection.mp. (14995)  
13 surgical wound infection.mp. (37378)  
14 12 or 13 (48237)  
15 6 and 11 and 14 (282)  
16 remove duplicates from 15 (233)

\*\*\*\*\*

Then CENTRAL search identified 75, and after duplicates removed this was 16 new. So total 249 records screened.

1  
2  
3  
4  
5  
6  
7  
8  
9  
10  
11  
12  
13  
14  
15  
16  
17  
18  
19  
20  
21  
22  
23  
24  
25  
26  
27  
28  
29  
30  
31  
32  
33  
34  
35  
36  
37  
38  
39  
40  
41  
42  
43  
44  
45  
46  
47  
48  
49  
50  
51  
52  
53  
54  
55  
56  
57  
58  
59  
60

For peer review only





# PRISMA 2009 Checklist

| Section/topic                      | #  | Checklist item                                                                                                                                                                                                                                                                                              | Reported on page # |
|------------------------------------|----|-------------------------------------------------------------------------------------------------------------------------------------------------------------------------------------------------------------------------------------------------------------------------------------------------------------|--------------------|
| <b>TITLE</b>                       |    |                                                                                                                                                                                                                                                                                                             |                    |
| Title                              | 1  | Identify the report as a systematic review, meta-analysis, or both.                                                                                                                                                                                                                                         | 1                  |
| <b>ABSTRACT</b>                    |    |                                                                                                                                                                                                                                                                                                             |                    |
| Structured summary                 | 2  | Provide a structured summary including, as applicable: background; objectives; data sources; study eligibility criteria, participants, and interventions; study appraisal and synthesis methods; results; limitations; conclusions and implications of key findings; systematic review registration number. | 2                  |
| <b>INTRODUCTION</b>                |    |                                                                                                                                                                                                                                                                                                             |                    |
| Rationale                          | 3  | Describe the rationale for the review in the context of what is already known.                                                                                                                                                                                                                              | 4/5                |
| Objectives                         | 4  | Provide an explicit statement of questions being addressed with reference to participants, interventions, comparisons, outcomes, and study design (PICOS).                                                                                                                                                  | 6                  |
| <b>METHODS</b>                     |    |                                                                                                                                                                                                                                                                                                             |                    |
| Protocol and registration          | 5  | Indicate if a review protocol exists, if and where it can be accessed (e.g., Web address), and, if available, provide registration information including registration number.                                                                                                                               | 6                  |
| Eligibility criteria               | 6  | Specify study characteristics (e.g., PICOS, length of follow-up) and report characteristics (e.g., years considered, language, publication status) used as criteria for eligibility, giving rationale.                                                                                                      | 7-9 and table 1    |
| Information sources                | 7  | Describe all information sources (e.g., databases with dates of coverage, contact with study authors to identify additional studies) in the search and date last searched.                                                                                                                                  | 6                  |
| Search                             | 8  | Present full electronic search strategy for at least one database, including any limits used, such that it could be repeated.                                                                                                                                                                               | 6                  |
| Study selection                    | 9  | State the process for selecting studies (i.e., screening, eligibility, included in systematic review, and, if applicable, included in the meta-analysis).                                                                                                                                                   | 6/7                |
| Data collection process            | 10 | Describe method of data extraction from reports (e.g., piloted forms, independently, in duplicate) and any processes for obtaining and confirming data from investigators.                                                                                                                                  | 6/7                |
| Data items                         | 11 | List and define all variables for which data were sought (e.g., PICOS, funding sources) and any assumptions and simplifications made.                                                                                                                                                                       | 7                  |
| Risk of bias in individual studies | 12 | Describe methods used for assessing risk of bias of individual studies (including specification of whether this was done at the study or outcome level), and how this information is to be used in any data synthesis.                                                                                      | 7                  |
| Summary measures                   | 13 | State the principal summary measures (e.g., risk ratio, difference in means).                                                                                                                                                                                                                               | 8                  |
| Synthesis of results               | 14 | Describe the methods of handling data and combining results of studies, if done, including measures of consistency (e.g., I <sup>2</sup> ) for each meta-analysis. <a href="http://bmjopen.bmj.com/site/about/guidelines.xhtml">http://bmjopen.bmj.com/site/about/guidelines.xhtml</a>                      | 8                  |

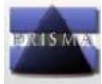

# PRISMA 2009 Checklist

Page 1 of 2

| Section/topic                 | #  | Checklist item                                                                                                                                                                                           | Reported on page # |
|-------------------------------|----|----------------------------------------------------------------------------------------------------------------------------------------------------------------------------------------------------------|--------------------|
| Risk of bias across studies   | 15 | Specify any assessment of risk of bias that may affect the cumulative evidence (e.g., publication bias, selective reporting within studies).                                                             | 7                  |
| Additional analyses           | 16 | Describe methods of additional analyses (e.g., sensitivity or subgroup analyses, meta-regression), if done, indicating which were pre-specified.                                                         | 8                  |
| <b>RESULTS</b>                |    |                                                                                                                                                                                                          |                    |
| Study selection               | 17 | Give numbers of studies screened, assessed for eligibility, and included in the review, with reasons for exclusions at each stage, ideally with a flow diagram.                                          | 8                  |
| Study characteristics         | 18 | For each study, present characteristics for which data were extracted (e.g., study size, PICOS, follow-up period) and provide the citations.                                                             | 8,9 table 1        |
| Risk of bias within studies   | 19 | Present data on risk of bias of each study and, if available, any outcome level assessment (see item 12).                                                                                                | 10, Figure 2       |
| Results of individual studies | 20 | For all outcomes considered (benefits or harms), present, for each study: (a) simple summary data for each intervention group (b) effect estimates and confidence intervals, ideally with a forest plot. | 9,10 Figure 2-5    |
| Synthesis of results          | 21 | Present results of each meta-analysis done, including confidence intervals and measures of consistency.                                                                                                  | 9,10 Figure 2-5    |
| Risk of bias across studies   | 22 | Present results of any assessment of risk of bias across studies (see Item 15).                                                                                                                          | 10, Figure 2       |
| Additional analysis           | 23 | Give results of additional analyses, if done (e.g., sensitivity or subgroup analyses, meta-regression [see Item 16]).                                                                                    | 9,10 Figure 2-5    |
| <b>DISCUSSION</b>             |    |                                                                                                                                                                                                          |                    |
| Summary of evidence           | 24 | Summarize the main findings including the strength of evidence for each main outcome; consider their relevance to key groups (e.g., healthcare providers, users, and policy makers).                     | 11, 12             |
| Limitations                   | 25 | Discuss limitations at study and outcome level (e.g., risk of bias), and at review-level (e.g., incomplete retrieval of identified research, reporting bias).                                            | 12,13              |
| Conclusions                   | 26 | Provide a general interpretation of the results in the context of other evidence, and implications for future research.                                                                                  | 13, 14             |

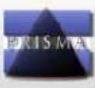

# PRISMA 2009 Checklist

1  
2  
3  
4  
5  
6  
7  
8  
9  
10  
11  
12  
13  
14  
15  
16  
17  
18  
19  
20  
21  
22  
23  
24  
25  
26  
27  
28  
29  
30  
31  
32  
33  
34  
35  
36  
37  
38  
39  
40  
41  
42  
43  
44  
45  
46  
47

|                |    |                                                                                                                                            |    |
|----------------|----|--------------------------------------------------------------------------------------------------------------------------------------------|----|
| <b>FUNDING</b> |    |                                                                                                                                            |    |
| Funding        | 27 | Describe sources of funding for the systematic review and other support (e.g., supply of data); role of funders for the systematic review. | 14 |

From: Moher D, Liberati A, Tetzlaff J, Altman DG, The PRISMA Group (2009). Preferred Reporting Items for Systematic Reviews and Meta-Analyses: The PRISMA Statement. PLoS Med 6(7): e1000097. doi:10.1371/journal.pmed1000097

For more information, visit: [www.prisma-statement.org](http://www.prisma-statement.org).

Page 2 of 2

For peer review only

# BMJ Open

## The use of triclosan coated sutures to prevent surgical site infections: a systematic review and meta-analysis of the literature

|                                 |                                                                                                                                                                                                                                                                                                                                                                       |
|---------------------------------|-----------------------------------------------------------------------------------------------------------------------------------------------------------------------------------------------------------------------------------------------------------------------------------------------------------------------------------------------------------------------|
| Journal:                        | <i>BMJ Open</i>                                                                                                                                                                                                                                                                                                                                                       |
| Manuscript ID                   | bmjopen-2019-029727.R3                                                                                                                                                                                                                                                                                                                                                |
| Article Type:                   | Research                                                                                                                                                                                                                                                                                                                                                              |
| Date Submitted by the Author:   | 06-Aug-2019                                                                                                                                                                                                                                                                                                                                                           |
| Complete List of Authors:       | Ahmed, Imran; University of Warwick, Clinical Trials Unit<br>Boulton, Adam; University Hospital Coventry<br>Rizvi, Sana; University Hospital Coventry<br>Carlos, William; University Hospital Coventry<br>Dickenson, Edward; University of Warwick, Warwick Medical School<br>Smith, NA; University of Warwick, Clinical Sciences Research Laboratories<br>Reed, Mike |
| <b>Primary Subject Heading</b>: | Surgery                                                                                                                                                                                                                                                                                                                                                               |
| Secondary Subject Heading:      | Infectious diseases                                                                                                                                                                                                                                                                                                                                                   |
| Keywords:                       | Surgical site infection, Triclosan, Systematic review                                                                                                                                                                                                                                                                                                                 |
|                                 |                                                                                                                                                                                                                                                                                                                                                                       |

SCHOLARONE™  
Manuscripts

# The use of triclosan coated sutures to prevent surgical site infections: a systematic review and meta-analysis of the literature

Imran Ahmed<sup>(1,2)</sup> ([imran.ahmed4@nhs.net](mailto:imran.ahmed4@nhs.net)), Adam J Boulton<sup>(1,2)</sup> ([adam.boulton@nhs.net](mailto:adam.boulton@nhs.net)), Sana Rizvi<sup>(2)</sup> ([sana.rizvi@nhs.net](mailto:sana.rizvi@nhs.net)). William J Carlos<sup>(2)</sup> ([William.carlos@nhs.net](mailto:William.carlos@nhs.net)), Edward Dickenson<sup>(1,2)</sup> ([e.j.l.dickenson@warwick.ac.uk](mailto:e.j.l.dickenson@warwick.ac.uk)), Nicholas Smith<sup>(1)</sup> ([nickasmith@doctors.net.uk](mailto:nickasmith@doctors.net.uk)), Mike Reed<sup>(4)</sup> ([mike.reed@nhs.net](mailto:mike.reed@nhs.net))

1: University of Warwick, Clinical trials Unit, Warwick Medical school, CSRL, UHCW, Coventry CV22DX, Coventry CV4 7AL

2: University Hospital Coventry and Warwickshire, Clifford Bridge Road, Coventry, CV2 2DX

3: Northumbria Healthcare NHS Foundation Trust, Northumberland, NE23 6NZ

Corresponding author

Imran Ahmed

University of Warwick, Warwick Clinical trials Unit, Warwick Medical school, Gibbett Hill Campus, Coventry CV4 7AL

[Imran.ahmed4@nhs.net](mailto:Imran.ahmed4@nhs.net)

02476968630

Orchid ID: 0000-0003-2774-9954

## ABSTRACT

### Introduction and objectives

Surgical site infections (SSIs) represent a common and serious complication of all surgical interventions.

Micro-organisms are able to colonise sutures that are implanted in the skin, which is a causative factor of SSIs. Triclosan coated sutures are antibacterial sutures aimed at reducing surgical site infections.

Our objective is to update the existing literature by systematically reviewing available evidence to assess the effectiveness of triclosan coated sutures in the prevention of surgical site infections.

### Methods

A systematic review of EMBASE, MEDLINE, AMED (Allied and complementary medicine database) and CENTRAL was performed to identify full text randomised controlled trials (RCTs) on 31/05/2019.

### Intervention

Triclosan coated sutures versus non triclosan coated sutures.

### Primary outcome

Our primary outcome was the development of surgical site infections at 30 days post operatively. A meta-analysis was performed using a fixed effects model.

### Results

Twenty five RCTs were included involving 11,957 participants. Triclosan coated sutures were used in 6008 participants and non triclosan coated sutures were used in 5949. Triclosan coated sutures significantly reduced the risk of surgical site infections at 30 days (RR 0.73, 95% CI 0.65 to 0.82). Further sensitivity analysis demonstrated that triclosan coated sutures significantly reduced the risk of surgical site infections in both clean and contaminated surgery.

### Conclusion

Triclosan coated sutures have been shown to significantly reduced the risk of surgical site infections when compared to standard sutures. This is in agreement with previous work in this area. This study represented the largest review to date in this area. This moderate quality evidence recommends the use

1 of Triclosan coated sutures in order to reduce the risk of SSIs particularly in clean and contaminated  
2  
3 surgical procedures.  
4

#### 5 Registration

6 PROSPERO (Reference: CRD42014014856).  
7

#### 8 Key words

9 Surgical site infection, triclosan, systematic review  
10

### 11 **Article summary**

#### 12 Strengths and limitations of this study

##### 13 Strengths

- 14 • Systematic nature of data collection and analysis
- 15 • Largest review to date in this topic area
- 16 • Analyses performed comparing different classifications of surgery i.e clean, clean-contaminated,  
17 contaminated and dirty.

##### 18 Limitations

- 19 • Heterogeneous nature of included studies. E.g. different age of participants, co-morbidities and  
20 surgery type.

##### 21 Original protocol

22 A protocol for this review was prospectively registered with PROSPERO (Reference: CRD42014014856).  
23

##### 24 Funding statement

25 This research received no specific grant from any funding agency in the public, commercial or not-for-  
26 profit sectors  
27

##### 28 Competing interests

29 All authors report no competing interests.  
30

31 Word count: 3596  
32  
33  
34  
35  
36  
37  
38  
39  
40  
41  
42  
43  
44  
45  
46  
47  
48  
49  
50  
51  
52  
53  
54  
55  
56  
57  
58  
59  
60

## INTRODUCTION

Surgical site infections (SSIs) represent a common complication throughout all surgical procedures<sup>1</sup>. It is estimated that SSIs account for 5% of all surgical complications<sup>2</sup> and 20% of all healthcare associated infections<sup>3,4</sup>. It is generally believed that the number of surgical procedures, particularly in elective orthopaedics<sup>5</sup>, will increase over the next decade, therefore increasing the incidence of SSIs. SSIs are associated with prolonged hospital admission<sup>6</sup> and increased morbidity and mortality<sup>7,8,9</sup>. In addition to having a significant impact on patient care and experience, SSIs also add substantial costs to healthcare providers. It is estimated that SSIs cost UK healthcare services approximately £61 million in 2012<sup>10</sup> and figures from the US highlight the extensive cost of SSIs with an estimated additional \$2300 per case<sup>11</sup>. Furthermore, Fleck *et al.* found that the mean cost of treated a SSI following sternal wound incision was \$11,200<sup>12</sup>. These are conservative estimates as active surveillance of SSIs not routinely performed<sup>6</sup>.

Due to the wide ranging deleterious effects of SSIs and their treatment, particularly in the context of increasing numbers of surgical procedures, there is a clinical need to reduce the incidence of SSIs. SSIs are multifactorial with patient factors such as age, co-morbidities including diabetes, and immunosuppression<sup>7,13-15</sup> contributing to their development, along with surgical factors. Many patient factors may not be optimised and hence research focus has been placed on surgical factors, including suture material.

SSIs may arise when bacteria colonise the suture material<sup>16</sup>, creating a biofilm as it passes through the skin<sup>17</sup>. This biofilm establishes an immunity from both antimicrobial treatment and the host immune system<sup>6,17</sup>. Once this biofilm develops there is an increased chance of a SSI developing. Research has shown bacteria may colonise monofilament and braided sutures<sup>18-20</sup>. With this in mind, considerable work has been carried out since the 1950s with regards to coating suture material with an antimicrobial, including silver<sup>21,22</sup>. Triclosan (polychlorophenoxyphenol) has been used for its antiseptic properties for



1 many years in toothpaste and soap and has an established safety profile<sup>5</sup>. Triclosan has been used to  
2  
3 successfully coat the following sutures and gained FDA (US food and drug administration) approval in  
4  
5 2002: braided polyglactan 910 (Vicryl Plus), poliglecaprone 25 (Monocryl Plus) and polydioxanone (PDS  
6  
7 Plus).  
8  
9

10  
11  
12  
13 *In vitro* and *in vivo* studies have shown the effectiveness of triclosan coated sutures<sup>23-25</sup> in killing bacteria  
14  
15 associated with SSIs and inhibiting colonisation of suture material, with one study demonstrating a 66%  
16  
17 reduction in bacterial colonisation<sup>26</sup>. Since then a large number of randomised control trials (RCTs) have  
18  
19 been performed with contrasting results of the effectiveness of triclosan coated sutures in the prevention  
20  
21 of SSIs. Subsequent meta-analyses have also produced conflicting results and hence the true effect  
22  
23 remains unclear<sup>6,7,27-32</sup>. The most recent and largest systematic review to date was performed by De Jonge  
24  
25 *et al.* and found triclosan coated sutures significantly reduced the incidence of SSIs<sup>32</sup>. This review searched  
26  
27 the literature up until November 2015 and included 6462 patients from RCTs published in peer-reviewed  
28  
29 journals as well as conference abstracts. Performing robust methodological appraisal of conference  
30  
31 abstracts is not possible, they do not permit thorough risk of bias assessments, and as they have not  
32  
33 undergone the formal journal peer-review process, they represent a potentially biased and unreliable  
34  
35 source of data. Since this review, a number of large, high quality RCTs have been produced<sup>33,34</sup>. Of note,  
36  
37 a recent RCT of 2546 patients found that triclosan coated sutures did not reduce the incidence of SSIs; a  
38  
39 finding in contrast to the previous systematic review<sup>32,34</sup>. This represents a substantial increase in the  
40  
41 number of patients available for meta-analysis since the last review. As a result, we believe it is important  
42  
43 to update the existing literature by performing a new, up to date, systematic review and meta-analysis to  
44  
45 assimilate the current evidence and inform clinical practice. A new review should include a detailed risk  
46  
47 of bias assessment and GRADE assessment of the quality of evidence.  
48  
49  
50  
51  
52  
53  
54  
55  
56  
57  
58  
59  
60

1 This new systematic review and meta-analysis of the available literature aims to determine whether the  
2  
3 use of triclosan coated sutures reduces the incidence of SSIs in comparison to standard non-coated  
4  
5 sutures.  
6  
7  
8  
9

## 10 11 **PICOS statement**

12  
13 The included population encompasses patients of any age and gender undergoing any surgical procedure  
14  
15 utilising sutures to close the wound. The intervention studied is the use of triclosan coated sutured and  
16  
17 comparison is made with non-triclosan coated sutures. The outcomes assessed are the rates of SSIs,  
18  
19 including superficial and deep SSIs. This systematic review will only include RCTs.  
20  
21  
22  
23  
24  
25  
26  
27

## 28 29 **METHODS**

30  
31 A systematic review of the available literature was conducted and is reported in accordance with the  
32  
33 Preferred Reporting Items for Systematic Reviews and Meta-Analyses (PRISMA) guidance<sup>35</sup>. A protocol for  
34  
35 this review was prospectively registered with PROSPERO (Reference: CRD42014014856).  
36  
37  
38  
39

### 40 41 **Search methods**

42  
43 Electronic searches were conducted using OVID SP on the following databases: MEDLINE(1946-May Week  
44  
45 4 2019); Excerpta Medica Database (EMBASE) (1974 to 2019 May 31); Allied and Complementary  
46  
47 Medicine (AMED) (1985 to May 2019); and Cochrane Central Register of Controlled Trials (CENTRAL). A  
48  
49 multi-purpose search was performed for all terms and the search terms were: "Triclosan", "Anti-bacterial  
50  
51 agents", "Anti-infective agents, local", "Coated materials, biocompatible", "Biomimetic material",  
52  
53 "Sutures", "Vicryl Plus", "Monocryl Plus", "PDS Plus", "Surgical site infection", "Surgical Wound infection".  
54  
55

56  
57 The search was conducted on 31<sup>st</sup> May 2019. A copy of the search strategy can be seen in supplementary  
58  
59 file 1.  
60

## 1      **Selection of Studies**

2  
3      Two authors (IA and AB) independently selected studies for inclusion. Any discrepancies were resolved by  
4  
5      discussion with a third author (ED). Titles and abstracts were screened and full texts obtained for any  
6  
7      studies of interest. The eligibility criteria were formed from the PICOS statement and registered on  
8  
9      PROSPERO prior to undertaking the search. Only RCTs published in peer-reviewed journals presenting  
10  
11      new data were included.  
12  
13

## 16      **Data extraction**

17  
18      Data was independently extracted from eligible included studies onto predetermined forms by two  
19  
20      authors (IA and AB). Any discrepancies were then resolved following discussion between two authors (IA  
21  
22      and AB) and a third author. Data extracted included baseline patient characteristics, surgical procedures  
23  
24      performed, number of centres, suture material, SSI diagnostic criteria, length of follow up, routine  
25  
26      prophylactic antibiotic use and number of SSIs. Data regarding superficial of deep SSI was extracted when  
27  
28      possible. Information regarding randomisation, blinding, funding and country of origin was extracted.  
29  
30  
31

## 34      **Assessment of Risk of Bias**

35  
36      Two authors (IA and AB) independently appraised eligible studies according to the Cochrane  
37  
38      Collaboration's risk of bias tool, resolving any discrepancies with a third author (ED) as necessary<sup>36</sup>. Review  
39  
40      Manager version 5.3 (The Nordic Cochrane Centre, The Cochrane Collaboration, 2014) was used to  
41  
42      generate the summary figures. The parameters used for 'other' sources of bias included source of funding  
43  
44      and antibiotic regime.  
45  
46

47  
48      Two authors (IA and AB) independently assessed the quality of evidence. We used the GRADE  
49  
50      considerations (study limitations, consistence of effect, imprecision, indirectness and publication bias) to  
51  
52      assess the quality of the body of evidence<sup>37</sup>. Decisions to upgrade or downgrade body of evidence have  
53  
54      been clearly stated in the discussion.  
55  
56  
57  
58  
59  
60

1 Publication bias was assessed following construction of a funnel plot in order to identify the presence or  
2  
3 absence of bias of this kind.  
4  
5

## 6 **Statistical analysis**

7  
8 A fixed effects model was used to calculate the predominant relative risk (RR) and the 95% confidence  
9 intervals of the studies included. Statistically heterogeneity was first assessed using a funnel plot and  
10  
11 more formally using the  $I^2$  statistic<sup>36</sup>. Forest plots were then generated summarising the results of the  
12  
13 meta-analysis using Review Manager 5.3.  
14  
15  
16  
17

## 18 **Patient and Public Involvement**

19  
20 Given the design of this study and the retrospective nature, patient and public members were not  
21  
22 involved in the development and conduct of this review. With the aid of patient and public members we  
23  
24 will produce lay summaries of the results available for patients.  
25  
26  
27  
28

## 29 **RESULTS**

30  
31 The search revealed 357 records of possible relevance. No other sources of records were identified.  
32  
33 Removal of duplicates left 249 records to be examined. 219 records were excluded based on title and  
34  
35 abstract screening. 30 full texts were assessed for eligibility and 25 studies were included in the meta-  
36  
37 analysis (see figure 1)<sup>2,7,11,33,34,38-57</sup>.  
38  
39  
40  
41  
42

### 43 **Study characteristics**

44  
45 Study characteristics are summarised in table 1. Twenty-five RCTs were included in this review involving  
46  
47 11,957 patients<sup>2,7,11,33,34,38-57</sup>. There were 6008 patients randomised to triclosan coated sutures and 5949  
48  
49 patients to standard sutures. In studies which reported mean age, the mean age reported in 23 out of 25  
50  
51 studies was comparable between the two groups (54.8 vs 54.8). For the studies which reported gender  
52  
53 57% of the included patients were male. Eight studies were multi-centre, with the remainder single-centre  
54  
55 studies (n=17). Vicryl was compared with Vicryl Plus in twelve studies<sup>11,34,39-41,43,46-49,54,56</sup>, three studies  
56  
57 compared PDS and versus PDS Plus<sup>7,38,55</sup>, one study compared PDS II with PDS II Plus<sup>44</sup>, two study  
58  
59 compared PDS and versus PDS Plus<sup>7,38,55</sup>, one study compared PDS II with PDS II Plus<sup>44</sup>, two study  
60

1 compared Monocryl against Monocryl Plus<sup>45,57</sup>, one compared Chinese silk with Vicryl Plus<sup>53</sup>, four studies  
2  
3 compared Vicryl and Monocryl versus Vicryl Plus and Monocryl Plus<sup>33,50-52</sup>, and two studies compared  
4  
5 Vicryl and PDS versus Vicryl Plus and PDS Plus<sup>2,42</sup>.  
6  
7

8 To define SSI, the Centre for disease control (CDC) criteria were used by 18 studies<sup>2,7,11,33,34,41-44,48,50-57</sup>,  
9  
10 clinical diagnosis or wound cultures was used by three studies studies<sup>39,45,49</sup>, and four did not provide  
11  
12 explicit definitions<sup>38,40,46,47</sup>. Seventeen studies used a follow up duration of 30 days or one month or four  
13  
14 weeks<sup>2,7,11,33,34,38,41-43,46,49,51,53-57</sup>, three for six weeks<sup>48,50,52</sup>, two for two weeks<sup>44,45</sup>, one for 80 days<sup>40</sup>, one  
15  
16 until discharge<sup>47</sup>, and one study did not specify a follow-up regime<sup>39</sup>. Routine prophylactic antibodies  
17  
18 were used in 19 studies<sup>2,7,11,34,38,39,42,44-51,54-57</sup>, no prophylactic antibiotics were used in one study<sup>40</sup>, one  
19  
20 used prophylactic antibiotics in high risk patients only<sup>52</sup>, one study used prophylactic antibiotics in 30% of  
21  
22 participants<sup>33</sup>, and three did specify prophylactic antibiotic use<sup>41,43,53</sup>.  
23  
24  
25  
26  
27

### 28 **Surgical site infection**

29  
30 The risk of developing surgical site infection was significantly reduced in the triclosan group compared to  
31  
32 the standard suture group (RR 0.73, 95% CI 0.65 to 0.82). Heterogeneity was low to moderate ( $\chi^2=24.66$ ,  
33  
34  $P=0.21$ ,  $I^2=17\%$ ). There were 420 instances of SSI amongst 6008 patients in the triclosan coated suture  
35  
36 group and 581 SSIs in 5949 patients in the standard suture group. See figure 2.  
37  
38  
39

### 40 **Sub-group analysis**

41  
42 Eight studies reported superficial and deep infections separately<sup>2,7,33,34,42,46,51,57</sup>. There were 152/3507  
43  
44 cases of superficial SSI in the triclosan group and 164/3626 cases in the standard suture group, producing  
45  
46 a meta-analysis risk ratio of 0.95 (95% CI 0.72 to 1.25). The risk of developing a deep infection was lower  
47  
48 in the triclosan group when compared to the standard suture group, however this was not significant (RR  
49  
50 0.77, 95% CI 0.55 to 1.07). There were 61/3507 cases of deep infections in the triclosan group and 85/3626  
51  
52 cases in the standard suture group. See figure 3.  
53  
54  
55  
56  
57  
58  
59  
60

1 Ten studies reported the incidence of surgical site infection for clean surgery<sup>33,39,43,49-53,56,58</sup>. Triclosan  
2 coated sutures were associated with a significantly lower incidence of SSI (149/3029) when compared to  
3 standard sutures (230/1117) (RR 0.71, 95% CI 0.58 to 0.88).  
4  
5  
6

7  
8 Six studies reported clean contaminated surgery and there was no difference between the two groups  
9  
10 (160/1540 vs 156/1504) (RR 1.02, 95% CI 0.83,1.25)<sup>2,7,40,42,46,54</sup>.  
11  
12

13 Four studies reported the incidence of surgical site infections in contaminated surgery<sup>11,47,55,57</sup>. Triclosan  
14 coated sutures were associated with a significantly lower risk of SSI (22/438) when compared to standard  
15 sutures (55/443) (RR 0.43, 95% CI 0.27 to,0.7).  
16  
17  
18

19  
20 Two further studies reported the incidence of surgical site infection for dirty surgery<sup>45,48</sup>. There was no  
21 significant difference in the incidence of SSIs between the two groups of sutures (25/102 vs 35/105) (RR  
22 0.74, 95% CI 0.46 to 1.18). See figure 4.  
23  
24  
25  
26  
27  
28  
29  
30

### 31 Risk of bias

32  
33 The results of the risk of bias screening can be seen on figure 2. The majority of studies had a clear  
34 randomisation sequence generation and allocation concealment using sealed envelopes. Five out of  
35 twenty five (20%) had high risk of selection bias, either because the randomisation method was not stated  
36 or a quasirandomisation method was used. Two further studies had a risk of selection bias due to unclear  
37 allocation concealment methods. Ten out of twenty five studies (40%) had high risk of performance and  
38 detection bias due to either absence of blinding of the participants and outcome assessors or the methods  
39 of blinding were not stated. Four out of twenty five (16%) were at high risk of other bias due to source of  
40 funding. One study had differences in antibiotic regime between the two groups, with one group not  
41 receiving any antibiotic prophylaxis.  
42  
43  
44  
45  
46  
47  
48  
49  
50  
51  
52  
53  
54

55 The distribution of studies in the funnel plot was symmetrical. No evidence was found for publication bias  
56 in this analysis (figure 5).  
57  
58  
59  
60

1 Statistical heterogeneity was assessed using the  $\tau^2$  (0.02) test and the  $I^2$  (17%) test, indicating there is low  
2  
3  
4 heterogeneity between the studies included in this review based on the recommendations in the  
5  
6 Cochrane handbook.  
7

## 8 **DISCUSSION**

9  
10  
11 This large systematic review of 25 randomised clinical trials included 11,957 patients and there were 1001  
12  
13 instances of SSI. The subsequent meta-analysis supports the use of triclosan-coated sutures in reducing  
14  
15 the risk of surgical site infections. We report a significantly lower risk of SSI when triclosan coated sutures  
16  
17 were used, compared to standard sutures in RCTs. Triclosan coated sutures were used in a wide range of  
18  
19 surgeries, including both adult and paediatric patients. The use of triclosan coated sutures significantly  
20  
21 reduced the risk of SSI in meta-analyses of clean surgery and also contaminated surgery. Further subgroup  
22  
23 analysis revealed a non-statistically significant reduction in the risk of developing deep SSIs with triclosan  
24  
25 coated sutures. Triclosan coated sutures appear to have no effect on the incidence of superficial SSIs.  
26  
27

28  
29 There have been 11 previous reviews in this topic area, the results of these reviews have been summarised  
30  
31 in table 2 <sup>27,28,30-32,59-64</sup>. Our results support the findings of Konstantelias et al who concluded that triclosan  
32  
33 coated sutures were associated with a significantly lower risk of SSI when compared to standard sutures  
34  
35 <sup>32,65</sup>. In addition, the authors concluded that triclosan coated sutures significantly reduced the risk of SSI  
36  
37 in clean, clean-contaminated, and contaminated surgery; in agreement with our findings <sup>65</sup>. De Jonge et  
38  
39 al reported a meta-analysis of 21 RCTs including 6462 patients, also concluding that triclosan coated  
40  
41 sutures significantly reduced the risk of SSI compared to standard sutures <sup>32</sup>. Five out of eleven reviews  
42  
43 included a risk of bias assessment<sup>27,31,32,60,64</sup> and only one review assessed the quality of evidence using  
44  
45 the GRADE criteria <sup>60</sup>.  
46  
47  
48  
49  
50  
51

### 52 **Quality of evidence**

53  
54 Using the GRADE criteria, the evidence was graded as 'moderate' quality. The reason for downgrading  
55  
56 was due to study limitations. Studies had high risk of selection bias due to unclear randomisation and  
57  
58 allocation methods. In addition, studies had a high risk of performance and detection bias due to issues  
59  
60

1 with blinding of participants and outcome assessors. The body of evidence was not downgraded for  
2  
3 inconsistency as there was narrow point estimates and low study heterogeneity ( $I^2=17\%$ ). There were no  
4  
5 issues with indirectness or imprecision as the outcome measures used are directly aligned to the outcome  
6  
7 measures of interest in this review. There were also a large number of participants included in this review  
8  
9 with satisfactory event rate numbers. Our symmetrical funnel plot indicated no risk of publication bias.  
10  
11 Given the quality of the evidence we are moderately confident in the effect estimate, the true effect is  
12  
13 likely to be close to the estimate of the effect.  
14  
15  
16  
17  
18  
19

20 The strengths of this current review include the thorough and systematic nature of data collection. This  
21  
22 review represents the most up to date review of the literature and is the largest review of RCTs to date,  
23  
24 including 11,957 patients from 25 RCTs. A recent RCT in elective hip and knee surgery included 2546  
25  
26 participants, the largest RCT to date in this subject<sup>58</sup>. This review is the only review to include this  
27  
28 important and well-conducted study. In addition, this systematic review only included peer-reviewed  
29  
30 studies with published full texts. Previous meta-analyses have included conference abstracts which do  
31  
32 not go through the same rigorous peer-review process as full journal publications and thus represent a  
33  
34 potential danger to review quality<sup>32</sup>. Furthermore, robust quality and risk of bias assessment is not  
35  
36 possible with these abstract publications<sup>66</sup>. A further strength of this review is the detailed and systematic  
37  
38 quality assessments, along with robust Cochrane risk of bias assessments, of all included studies<sup>36,66</sup>. As  
39  
40 demonstrated in table 2 five out of eleven reviews assessed risk of bias and one out of eleven reviews  
41  
42 assessed the quality of evidence. A strength of this review is the inclusion of a thorough risk of bias and  
43  
44 GRADE assessment. In addition, this new review included further detailed sub group analysis based on  
45  
46 superficial vs deep surgical infections and based on type of surgery e.g. clean, clean contaminated,  
47  
48 contaminated and dirty surgery.  
49  
50  
51  
52  
53  
54  
55  
56  
57  
58  
59  
60



1 The main weakness of this review is the study population. The review includes procedures which were  
2  
3 classed as clean, clean- contaminated, contaminated, and dirty. These types of surgery would all have  
4  
5 differing rates of SSI. The authors therefore performed a sub-analyses of the different categories of  
6  
7 surgery. Routine antibiotic prophylaxis was used in 15 studies<sup>2,7,11,38,39,42,44-51,58</sup> with a variation in the  
8  
9 antibiotic agent used and the timing. This is a potential confounder for the frequency of SSI<sup>67</sup>. A proportion  
10  
11 of the included studies assessed patients with an underlying malignancy who may have been  
12  
13 immunosuppressed. This influences the rate of SSI and is not accounted for in many of the included  
14  
15 studies<sup>68</sup>. Another weakness is the heterogeneity in the use of triclosan coated sutures. In some studies,  
16  
17 triclosan was used for closure of all surgical layers, whereas in other studies triclosan coated sutures were  
18  
19 only used on the superficial layers. This study heterogeneity should be noted when interpreting the meta-  
20  
21 analysis result. This review reports trials using CDC criteria for superficial site infections. It is important to  
22  
23 note that a stitch abscess does not meet the criteria for a superficial site infections. Patients may present  
24  
25 with a stitch abscess to healthcare professionals and undergo treatment. This study does not report the  
26  
27 impact of triclosan coated sutures on stitch abscesses.  
28  
29  
30  
31  
32  
33  
34  
35  
36

37 Our review is the largest review of RCTs to date in terms of patient numbers and demonstrates clinical  
38  
39 effectiveness of triclosan coated sutures when compared to standard sutures when assessing SSI rate.  
40  
41 SSIs have been shown to have a significant impact on patient quality of life, as well as an increased burden  
42  
43 on healthcare providers in terms of resource allocation. The cost of triclosan sutures is variable, however  
44  
45 the cost of SSI to patients and healthcare providers is sizeable<sup>10-12</sup>. A robust cost-analysis has not been  
46  
47 performed, nevertheless, organisations should consider carefully whether they routinely use triclosan  
48  
49 coated sutures in light of these positive meta-analysis findings. This review also identified that triclosan  
50  
51 coated sutures significantly reduced the risk of SSIs in clean and contaminated surgery, therefore  
52  
53 thoughtful consideration should be paid to whether they are routinely used in this patient population.  
54  
55 The results demonstrate that triclosan coated sutures may not be as effective in reducing SSI rate in 'clean-  
56  
57  
58  
59  
60

1 contaminated' and 'dirty' surgery. However, a potential explanation for 'dirty' surgery is the low patient  
2  
3 numbers included in this subgroup. This is a potential area of future research given the effectiveness of  
4  
5 triclosan coated sutures in 'clean' and 'contaminated' surgery.  
6  
7  
8  
9

## 10 **Conclusion**

11  
12  
13 This systematic review identified 25 RCTs examining the effect of triclosan in reducing incidence of SSI,  
14  
15 compared with non-coated sutures. The subsequent meta-analysis included 11,957 patient and revealed  
16  
17 an overall a risk ratio of RR 0.73, (95% CI 0.65 to 0.82) of developing SSI in favour of triclosan coated  
18  
19 sutures, thereby demonstrating a statistically significant lower risk of SSI following closure of a surgical  
20  
21 wound with triclosan coated sutures. Further analysis has demonstrated that triclosan coated sutures  
22  
23 significantly reduced the risk of SSIs in clean and contaminated surgery. This study is in agreement with  
24  
25 previous smaller and less robust reviews which have produced comparable results. This is the largest  
26  
27 review of RCTs in terms of number of included studies and number of participants from RCTs to  
28  
29 demonstrate the clinical effectiveness of triclosan coated sutures. Further detailed cost effectiveness is  
30  
31 required to assess the economic benefit of implementing the use of these sutures. The evidence  
32  
33 considered in this review suggests that triclosan coated sutures are effective in reducing surgical site  
34  
35 infections, the use should in particular be considered in clean and contaminated surgery.  
36  
37  
38  
39  
40  
41  
42  
43  
44  
45

## 46 **Acknowledgements**

47  
48 The authors would like to acknowledge Andrew Sprowson who died unexpectedly on 13 March 2015.  
49  
50 Andrew played a key role in conceiving the idea for this review and provided the early supervision to  
51  
52 ensure this review took place successfully. Andrew was an academic orthopaedic surgeon who was  
53  
54 dedicated to improving evidence-based care in his field. He was an exceptional researcher, surgeon,  
55  
56 colleague and friend greatly missed by all of us.  
57  
58  
59

## 60 **Funding**

1 This research received no specific grant from any funding agency in the public, commercial or not-for-  
2  
3 profit sectors  
4

#### 5 Competing interests

6  
7  
8 The authors report no competing interests for this study  
9

#### 10 Ethical Approval

11  
12  
13 No ethical approval required for this study.  
14

#### 15 Data Statement

16  
17  
18 Raw data is available on request by email to the corresponding author.  
19

#### 20 Author contributions

21  
22  
23 All authors contributed to the production of this manuscript and meet the ICMJE criteria.  
24

- 25 • IA: Conception of review, data collection, analysis, drafted final manuscript
- 26
- 27 • AB: Data collection, analysis, drafted final manuscript
- 28
- 29
- 30 • SR: Data analysis and revised final manuscript
- 31
- 32
- 33 • WC: Data analysis and revised final manuscript
- 34
- 35 • ED: Data collection and revision of final manuscript
- 36
- 37
- 38 • NS: Revision of final manuscript
- 39
- 40 • MR: Conception of idea and revision of final manuscript
- 41
- 42
- 43
- 44
- 45
- 46
- 47
- 48
- 49
- 50
- 51
- 52
- 53
- 54
- 55
- 56
- 57
- 58
- 59
- 60

1  
2  
3  
4  
5  
6  
7  
8  
9  
10  
11  
12  
13  
14  
15  
16  
17  
18  
19  
20  
21  
22  
23  
24  
25  
26  
27  
28  
29  
30  
31  
32  
33  
34  
35  
36  
37  
38  
39  
40  
41  
42  
43  
44  
45  
46  
47  
48  
49  
50  
51  
52  
53  
54  
55  
56  
57  
58  
59  
60  

## REFERENCES

1. Magill SS, Edwards JR, Bamberg W, et al. Multistate Point-Prevalence Survey of Health Care-Associated Infections. *The New England journal of medicine* 2014; **370**(13): 1198-208.
2. Mattavelli I, Rebori P, Doglietto G, et al. Multi-Center Randomized Controlled Trial on the Effect of Triclosan-Coated Sutures on Surgical Site Infection after Colorectal Surgery. *Surg Infect (Larchmt)* 2015; **16**(3): 226-35.
3. Leaper DJ. Surgical-site infection. *The British journal of surgery* 2010; **97**(11): 1601-2.
4. Hranjec T, Swenson BR, Sawyer RG. Surgical site infection prevention: how we do it. *Surgical infections* 2010; **11**(3): 289-94.
5. Kurtz S, Ong K, Lau E, Mowat F, Halpern M. Projections of primary and revision hip and knee arthroplasty in the United States from 2005 to 2030. *The Journal of bone and joint surgery American volume* 2007; **89**(4): 780-5.
6. Chang WK, Srinivasa S, Morton R, Hill AG. Triclosan-impregnated sutures to decrease surgical site infections: systematic review and meta-analysis of randomized trials. *Ann Surg* 2012; **255**(5): 854-9.
7. Diener MK, Knebel P, Kieser M, et al. Effectiveness of triclosan-coated PDS Plus versus uncoated PDS II sutures for prevention of surgical site infection after abdominal wall closure: the randomised controlled PROUD trial. *Lancet* 2014; **384**(9938): 142-52.
8. de Lissovoy G, Fraeman K, Hutchins V, Murphy D, Song D, Vaughn BB. Surgical site infection: incidence and impact on hospital utilization and treatment costs. *American journal of infection control* 2009; **37**(5): 387-97.
9. Kirkland KB, Briggs JP, Trivette SL, Wilkinson WE, Sexton DJ. The impact of surgical-site infections in the 1990s: attributable mortality, excess length of hospitalization, and extra costs. *Infection control and hospital epidemiology* 1999; **20**(11): 725-30.
10. Namba RS, Inacio MC, Paxton EW. Risk factors associated with surgical site infection in 30,491 primary total hip replacements. *The Journal of bone and joint surgery British volume* 2012; **94**(10): 1330-8.
11. Nakamura T, Kashimura N, Noji T, et al. Triclosan-coated sutures reduce the incidence of wound infections and the costs after colorectal surgery: a randomized controlled trial. *Surgery* 2013; **153**(4): 576-83.
12. Fleck T, Moidl R, Blacky A, et al. Triclosan-coated sutures for the reduction of sternal wound infections: economic considerations. *The Annals of thoracic surgery* 2007; **84**(1): 232-6.
13. Neumayer L, Hosokawa P, Itani K, El-Tamer M, Henderson WG, Khuri SF. Multivariable predictors of postoperative surgical site infection after general and vascular surgery: results from the patient safety in surgery study. *J Am Coll Surg* 2007; **204**(6): 1178-87.
14. Malone DL, Genuit T, Tracy JK, Gannon C, Napolitano LM. Surgical site infections: reanalysis of risk factors. *The Journal of surgical research* 2002; **103**(1): 89-95.
15. Cheadle WG. Risk factors for surgical site infection. *Surg Infect (Larchmt)* 2006; **7 Suppl 1**: S7-11.
16. Katz S, Izhar M, Mirelman D. Bacterial adherence to surgical sutures. A possible factor in suture induced infection. *Ann Surg* 1981; **194**(1): 35-41.
17. Gristina AG, Price JL, Hobgood CD, Webb LX, Costerton JW. Bacterial colonization of percutaneous sutures. *Surgery* 1985; **98**(1): 12-9.
18. Kathju S, Nistico L, Hall-Stoodley L, Post JC, Ehrlich GD, Stoodley P. Chronic surgical site infection due to suture-associated polymicrobial biofilm. *Surg Infect (Larchmt)* 2009; **10**(5): 457-61.
19. Kathju S, Nistico L, Lasko LA, Stoodley P. Bacterial biofilm on monofilament suture and porcine xenograft after inguinal herniorrhaphy. *FEMS immunology and medical microbiology* 2010; **59**(3): 405-9.
20. Kathju S, Nistico L, Tower I, Lasko LA, Stoodley P. Bacterial biofilms on implanted suture material are a cause of surgical site infection. *Surg Infect (Larchmt)* 2014; **15**(5): 592-600.

- 1 21. Darouiche RO, Meade R, Mansouri M, Raad, II. In vivo efficacy of antimicrobial-coated fabric from  
2 prosthetic heart valve sewing rings. *The Journal of heart valve disease* 1998; **7**(6): 639-46.
- 3 22. Blaker JJ, Nazhat SN, Boccaccini AR. Development and characterisation of silver-doped bioactive  
4 glass-coated sutures for tissue engineering and wound healing applications. *Biomaterials* 2004; **25**(7-8):  
5 1319-29.
- 6 23. Storch ML, Rothenburger SJ, Jacinto G. Experimental efficacy study of coated VICRYL plus  
7 antibacterial suture in guinea pigs challenged with *Staphylococcus aureus*. *Surg Infect (Larchmt)* 2004;  
8 **5**(3): 281-8.
- 9 24. Ming X, Rothenburger S, Nichols MM. In vivo and in vitro antibacterial efficacy of PDS plus  
10 (polidioxanone with triclosan) suture. *Surg Infect (Larchmt)* 2008; **9**(4): 451-7.
- 11 25. Rothenburger S, Spangler D, Bhende S, Burkley D. In vitro antimicrobial evaluation of Coated  
12 VICRYL\* Plus Antibacterial Suture (coated polyglactin 910 with triclosan) using zone of inhibition assays.  
13 *Surg Infect (Larchmt)* 2002; **3 Suppl 1**: S79-87.
- 14 26. Marco F, Vallez R, Gonzalez P, Ortega L, de la Lama J, Lopez-Duran L. Study of the efficacy of coated  
15 Vicryl plus antibacterial suture in an animal model of orthopedic surgery. *Surgical infections* 2007; **8**(3):  
16 359-65.
- 17 27. Wang ZX, Jiang CP, Cao Y, Ding YT. Systematic review and meta-analysis of triclosan-coated sutures  
18 for the prevention of surgical-site infection. *The British journal of surgery* 2013; **100**(4): 465-73.
- 19 28. Edmiston CE, Jr., Daoud FC, Leaper D. Is there an evidence-based argument for embracing an  
20 antimicrobial (triclosan)-coated suture technology to reduce the risk for surgical-site infections?: A meta-  
21 analysis. *Surgery* 2013; **154**(1): 89-100.
- 22 29. Sajid MS, Craciunas L, Sains P, Singh K, Baig M. Use of antibacterial sutures for skin closure in  
23 controlling surgical site infections: a systematic review of published randomized, controlled trials.  
24 *Gastroenterol Rep (Oxf)*; 2013: 42-50.
- 25 30. Daoud FC, Edmiston CE, Leaper D. Meta-Analysis of Prevention of Surgical Site Infections following  
26 Incision Closure with Triclosan-Coated Sutures: Robustness to New Evidence. *Surg Infect (Larchmt)*; 2014:  
27 165-81.
- 28 31. Guo J, Pan LH, Li YX, et al. Efficacy of triclosan-coated sutures for reducing risk of surgical site  
29 infection in adults: a meta-analysis of randomized clinical trials. *The Journal of surgical research* 2016;  
30 **201**(1): 105-17.
- 31 32. de Jonge SW, Atema JJ, Solomkin JS, Boermeester MA. Meta-analysis and trial sequential analysis  
32 of triclosan-coated sutures for the prevention of surgical-site infection. *The British journal of surgery* 2017;  
33 **104**(2): e118-e33.
- 34 33. Renko M, Paalanne N, Tapiainen T, et al. Triclosan-containing sutures versus ordinary sutures for  
35 reducing surgical site infections in children: a double-blind, randomised controlled trial. *Lancet Infect Dis*  
36 2017; **17**(1): 50-7.
- 37 34. Sprowson AP, Jensen C, Parsons N, et al. The effect of triclosan-coated sutures on the rate of  
38 surgical site infection after hip and knee arthroplasty: a double-blind randomized controlled trial of 2546  
39 patients. *Bone Joint J* 2018; **100-b**(3): 296-302.
- 40 35. Moher D, Liberati A, Tetzlaff J, Altman DG. Preferred reporting items for systematic reviews and  
41 meta-analyses: the PRISMA statement. *PLoS medicine* 2009; **6**(7): e1000097.
- 42 36. Green S, Higgins J. Cochrane handbook for systematic reviews of interventions. Version; 2005.
- 43 37. Guyatt GH, Oxman AD, Vist GE, et al. GRADE: an emerging consensus on rating quality of evidence  
44 and strength of recommendations. *BMJ* 2008; **336**(7650): 924-6.
- 45 38. Baracs J, Huszar O, Sajjadi SG, Horvath OP. Surgical site infections after abdominal closure in  
46 colorectal surgery using triclosan-coated absorbable suture (PDS Plus) vs. uncoated sutures (PDS II): a  
47 randomized multicenter study. *Surg Infect (Larchmt)* 2011; **12**(6): 483-9.
- 48 39. Chen SY, Chen TM, Dai NT, et al. Do antibacterial-coated sutures reduce wound infection in head  
49 and neck cancer reconstruction? *European journal of surgical oncology : the journal of the European*  
50 *Society of Surgical Oncology and the British Association of Surgical Oncology* 2011; **37**(4): 300-4.

- 1 40. Ford HR, Jones P, Gaines B, Reblock K, Simpkins DL. Intraoperative handling and wound healing:  
2 controlled clinical trial comparing coated VICRYL plus antibacterial suture (coated polyglactin 910 suture  
3 with triclosan) with coated VICRYL suture (coated polyglactin 910 suture). *Surgical infections* 2005; **6**(3):  
4 313-21.
- 5 41. Galal I, El-Hindawy K. Impact of using triclosan-antibacterial sutures on incidence of surgical site  
6 infection. *American journal of surgery* 2011; **202**(2): 133-8.
- 7 42. Ichida K, Noda H, Kikugawa R, et al. Effect of triclosan-coated sutures on the incidence of surgical  
8 site infection after abdominal wall closure in gastroenterological surgery: a double-blind, randomized  
9 controlled trial in a single center. *Surgery* 2018.
- 10 43. Isik I, Selimen D, Senay S, Alhan C. Efficiency of antibacterial suture material in cardiac surgery: a  
11 double-blind randomized prospective study. *The heart surgery forum* 2012; **15**(1): E40-5.
- 12 44. Justinger C, Slotta JE, Ningel S, Graber S, Kollmar O, Schilling MK. Surgical-site infection after  
13 abdominal wall closure with triclosan-impregnated polydioxanone sutures: results of a randomized  
14 clinical pathway facilitated trial (NCT00998907). *Surgery* 2013; **154**(3): 589-95.
- 15 45. Karip AB, Celik K, Aydin T, et al. Effect of Triclosan-Coated Suture and Antibiotic Prophylaxis on  
16 Infection and Recurrence after Karydakias Flap Repair for Pilonidal Disease: A Randomized Parallel-Arm  
17 Double-Blinded Clinical Trial. *Surg Infect (Larchmt)* 2016; **17**(5): 583-8.
- 18 46. Mingmalairak C, Ungbhakorn P, Paocharoen V. Efficacy of antimicrobial coating suture coated  
19 polyglactin 910 with triclosan (Vicryl plus) compared with polyglactin 910 (Vicryl) in reduced surgical site  
20 infection of appendicitis, double blind randomized control trial, preliminary safety report. *Journal of the  
21 Medical Association of Thailand = Chotmaihet thangphaet* 2009; **92**(6): 770-5.
- 22 47. Rasic Z, Schwarz D, Adam VN, et al. Efficacy of antimicrobial triclosan-coated polyglactin 910  
23 (Vicryl\* Plus) suture for closure of the abdominal wall after colorectal surgery. *Collegium antropologicum*  
24 2011; **35**(2): 439-43.
- 25 48. Ruiz-Tovar J, Alonso N, Morales V, Llaveró C. Association between Triclosan-Coated Sutures for  
26 Abdominal Wall Closure and Incisional Surgical Site Infection after Open Surgery in Patients Presenting  
27 with Fecal Peritonitis: A Randomized Clinical Trial. *Surg Infect (Larchmt)* 2015; **16**(5): 588-94.
- 28 49. Seim BE, Tonnessen T, Woldbaek PR. Triclosan-coated sutures do not reduce leg wound infections  
29 after coronary artery bypass grafting. *Interact Cardiovasc Thorac Surg* 2012; **15**(3): 411-5.
- 30 50. Thimour-Bergstrom L, Roman-Emanuel C, Schersten H, Friberg O, Gudbjartsson T, Jeppsson A.  
31 Triclosan-coated sutures reduce surgical site infection after open vein harvesting in coronary artery  
32 bypass grafting patients: a randomized controlled trial. *European journal of cardio-thoracic surgery :  
33 official journal of the European Association for Cardio-thoracic Surgery* 2013; **44**(5): 931-8.
- 34 51. Turtiainen J, Saimanen EI, Makinen KT, et al. Effect of triclosan-coated sutures on the incidence of  
35 surgical wound infection after lower limb revascularization surgery: a randomized controlled trial. *World  
36 journal of surgery* 2012; **36**(10): 2528-34.
- 37 52. Williams N, Sweetland H, Goyal S, Ivins N, Leaper DJ. Randomized trial of antimicrobial-coated  
38 sutures to prevent surgical site infection after breast cancer surgery. *Surg Infect (Larchmt)* 2011; **12**(6):  
39 469-74.
- 40 53. Zhang ZT, Zhang HW, Fang XD, et al. Cosmetic outcome and surgical site infection rates of  
41 antibacterial absorbable (Polyglactin 910) suture compared to Chinese silk suture in breast cancer surgery:  
42 a randomized pilot research. *Chin Med J (Engl)* 2011; **124**(5): 719-24.
- 43 54. Tabrizi R, Mohajerani H, Bozorgmehr F. Polyglactin 910 suture compared with polyglactin 910  
44 coated with triclosan in dental implant surgery: randomized clinical trial. *International Journal of Oral and  
45 Maxillofacial Surgery* 2019.
- 46 55. Roy PK, Kalita P, Lahlhenmawia H, et al. Comparison of surgical site infection rate between  
47 antibacterial coated surgical suture and conventional suture: A randomized controlled single centre study  
48 for preventive measure of postoperative infection. *International Journal of Pharmaceutical Sciences and  
49 Research* 2019; **10**(5): 2385-91.
- 50  
51  
52  
53  
54  
55  
56  
57  
58  
59  
60

- 1 56. Lin SJ, Chang FC, Huang TW, Peng KT, Shih HN, Lee MS. Temporal Change of Interleukin-6, C-  
2 Reactive Protein, and Skin Temperature after Total Knee Arthroplasty Using Triclosan-Coated Sutures.  
3 *BioMed Research International* 2018; **2018**: 9136208.
- 4 57. Arslan NC, Atasoy G, Altintas T, Terzi C. Effect of triclosan-coated sutures on surgical site infections  
5 in pilonidal disease: prospective randomized study. *International Journal of Colorectal Disease* 2018;  
6 **33**(10): 1445-52.
- 7 58. Sprowson AP, Jensen C, Parsons N, et al. The effect of triclosan-coated sutures on the rate of  
8 surgical site infection after hip and knee arthroplasty: a double-blind randomized controlled trial of 2546  
9 patients. *Bone & Joint Journal* 2018; **100-B**(3): 296-302.
- 10 59. Apisarnthanarak A, Singh N, Bandong AN, Madriaga G. Triclosan-coated sutures reduce the risk of  
11 surgical site infections: a systematic review and meta-analysis. *Infection Control & Hospital Epidemiology*  
12 2015; **36**(2): 169-79.
- 13 60. Wu X, Kubilay NZ, Ren J, et al. Antimicrobial-coated sutures to decrease surgical site infections: a  
14 systematic review and meta-analysis. *European Journal of Clinical Microbiology & Infectious Diseases*  
15 2017; **36**(1): 19-32.
- 16 61. Henriksen NA, Deerenberg EB, Venclauskas L, et al. Triclosan-coated sutures and surgical site  
17 infection in abdominal surgery: the TRISTAN review, meta-analysis and trial sequential analysis. *Hernia*  
18 2017; **21**(6): 833-41.
- 19 62. Konstantelias AA, Andriakopoulou CS, Mourgela S. Triclosan-coated sutures for the prevention of  
20 surgical-site infections: a meta-analysis. *Acta Chirurgica Belgica* 2017; **117**(3): 137-48.
- 21 63. Leaper DJ, Edmiston CE, Jr., Holy CE. Meta-analysis of the potential economic impact following  
22 introduction of absorbable antimicrobial sutures. *British Journal of Surgery* 2017; **104**(2): e134-e44.
- 23 64. Sandini M, Mattavelli I, Nespoli L, Uggeri F, Gianotti L. Systematic review and meta-analysis of  
24 sutures coated with triclosan for the prevention of surgical site infection after elective colorectal surgery  
25 according to the PRISMA statement. *Medicine* 2016; **95**(35): e4057.
- 26 65. Konstantelias AA, Andriakopoulou CS, Mourgela S. Triclosan-coated sutures for the prevention of  
27 surgical-site infections: a meta-analysis. *Acta Chir Belg* 2017; **117**(3): 137-48.
- 28 66. Higgins JP, Altman DG, Gotzsche PC, et al. The Cochrane Collaboration's tool for assessing risk of  
29 bias in randomised trials. *Bmj* 2011; **343**: d5928.
- 30 67. Hawn MT, Richman JS, Vick CC, et al. Timing of surgical antibiotic prophylaxis and the risk of  
31 surgical site infection. *JAMA surgery* 2013; **148**(7): 649-57.
- 32 68. Blam OG, Vaccaro AR, Vanichkachorn JS, et al. Risk factors for surgical site infection in the patient  
33 with spinal injury. *Spine (Phila Pa 1976)* 2003; **28**(13): 1475-80.
- 34  
35  
36  
37  
38  
39  
40  
41  
42  
43  
44  
45  
46  
47  
48  
49  
50  
51  
52  
53  
54  
55  
56  
57  
58  
59  
60

1  
2  
3  
4  
5  
6  
7  
8  
9  
10  
11  
12  
13  
14  
15  
16  
17  
18  
19  
20  
21  
22  
23  
24  
25  
26  
27  
28  
29  
30  
31  
32  
33  
34  
35  
36  
37  
38  
39  
40  
41  
42  
43  
44  
45  
46  
47  
48  
49  
50  
51  
52  
53  
54  
55  
56  
57  
58  
59  
60

For peer review only



| Study             | No. of participants | No. of centres | Surgery type                                                | Sutures used                                                              | SSI criteria                                                               | Duration of follow-up        | Routine prophylactic antibiotics? |
|-------------------|---------------------|----------------|-------------------------------------------------------------|---------------------------------------------------------------------------|----------------------------------------------------------------------------|------------------------------|-----------------------------------|
| Arslan 2018       | 177                 | 1              | Surgery for pilonidal disease                               | Vicryl vs Vicryl plus                                                     | CDC criteria                                                               | 30 days                      | Yes                               |
| Baracs 2011       | 385                 | 7              | Elective colorectal surgery                                 | PDS vs PDS Plus                                                           | Not stated                                                                 | 30 days                      | Yes                               |
| Chen 2011         | 241                 | 1              | Head and neck surgery                                       | Vicryl vs Vicryl Plus                                                     | Local erythema with purulent discharge, wound dehiscence, or skin necrosis | Not stated                   | Yes                               |
| Diener 2014       | 1185                | 24             | Laparotomy                                                  | PDS vs PDS Plus                                                           | CDC criteria                                                               | 30 days                      | Yes                               |
| Ford 2005         | 147                 | 1              | Paediatric general surgery                                  | Vicryl vs Vicryl Plus                                                     | Not stated                                                                 | 80 days                      | No                                |
| Galal 2011        | 450                 | 1              | All surgery                                                 | Vicryl vs Vicryl Plus                                                     | CDC criteria                                                               | 30 days                      | Not stated                        |
| Ichida 2018       | 1023                | 1              | Gastroenterologic surgery                                   | Vicryl and PDS II vs Vicryl Plus and PDS Plus                             | CDC criteria                                                               | 30 days                      | Yes                               |
| Isik 2011         | 510                 | 1              | Cardiac surgery                                             | Vicryl vs Vicryl Plus                                                     | CDC criteria                                                               | 1 month                      | Not stated                        |
| Justinger 2013    | 856                 | 1              | Laparotomy                                                  | PDS II vs PDS II Plus                                                     | CDC criteria                                                               | 2 weeks                      | Yes                               |
| Karip 2016        | 106                 | 1              | Pilonidal sinus excision followed by Karydakias flap repair | Monocryl Plus vs Monocryl                                                 | Rash, fever or purulent discharge                                          | 2 weeks                      | Yes                               |
| Lin 2018          | 102                 | 1              | Total knee replacement surgery                              | Vicryl vs Vicryl plus                                                     | CDC criteria                                                               | 30 days                      | Yes                               |
| Mattavelli 2015   | 300                 | 4              | Elective colorectal surgery                                 | Vicryl and PDS vs Vicryl Plus and PDS Plus                                | CDC criteria                                                               | 30 days                      | Yes                               |
| Mingmalairak 2009 | 100                 | 1              | Appendectomy                                                | Vicryl vs Vicryl Plus                                                     | Not stated                                                                 | 30 days, 6 months and 1 year | Yes                               |
| Nakamura 2013     | 410                 | 1              | Elective colorectal surgery                                 | Vicryl vs Vicryl Plus                                                     | CDC criteria                                                               | 30 days                      | Yes                               |
| Rasic 2011        | 184                 | 1              | Elective colorectal cancer surgery                          | Vicryl vs Vicryl Plus                                                     | Not stated                                                                 | To discharge                 | Yes                               |
| Renko 2017        | 1633                | 1              | Paediatric surgery                                          | Vicryl and Monocryl and PDS vs Vicryl Plus and Monocryl Plus and PDS Plus | CDC criteria                                                               | 30 days                      | In 30%                            |
| Roy 2019          | 110                 | 1              | Gastrointestinal surgery                                    | PDS vs PDS plus                                                           | CDC criteria                                                               | 30 days                      | Yes                               |

|                               |      |   |                                                    |                                                            |                                                         |         |                          |
|-------------------------------|------|---|----------------------------------------------------|------------------------------------------------------------|---------------------------------------------------------|---------|--------------------------|
| Ruiz-Tovar<br>2015            | 110  | 3 | Open colorectal surgery<br>with faecal peritonitis | Vicryl vs Vicryl Plus                                      | CDC criteria                                            | 60 days | Yes                      |
| Seim 2012                     | 328  | 1 | CABG leg wound                                     | Vicryl vs Vicryl Plus                                      | Positive bacterial<br>culture and clinical<br>judgement | 4 weeks | Yes                      |
| Sprowson<br>2018              | 2546 | 3 | Primary THR or TKR                                 | Vicryl vs Vicryl Plus                                      | CDC criteria                                            | 30 days | Yes                      |
| Tabrizi 2018                  | 320  | 2 | Dental implant surgery                             | Vicryl vs Vicryl plus                                      | CDC criteria                                            | 30 days | Yes                      |
| Thimour-<br>Bergstrom<br>2013 | 392  | 1 | CABG (+/-AVR, MVR) with<br>saphenous vein graft    | Vicryl and Monocryl vs<br>Vicryl Plus and Monocryl<br>Plus | CDC criteria                                            | 60 days | Yes                      |
| Turtiainen<br>2012            | 276  | 3 | Non-emergency lower-limb<br>arterial surgery       | Vicryl and Monocryl vs<br>Vicryl Plus and Monocryl<br>Plus | CDC criteria                                            | 30 days | Yes                      |
| Williams 2011                 | 150  | 1 | Mastectomy                                         | Vicryl and Monocryl vs<br>Vicryl Plus and Monocryl<br>Plus | CDC criteria                                            | 6 weeks | If considered<br>at risk |
| Zhang 2011                    | 101  | 6 | Mastectomy                                         | Chinese silk vs Vicryl Plus                                | CDC criteria                                            | 30 days | Not stated               |

Table 1: Study characteristics of included RCTs in this review

| Author              | Date | Journal                                     | Number of studies         | Number of participants | Findings                                                                                                                                                                                                                                                     | Risk of bias | Grade        |
|---------------------|------|---------------------------------------------|---------------------------|------------------------|--------------------------------------------------------------------------------------------------------------------------------------------------------------------------------------------------------------------------------------------------------------|--------------|--------------|
| Wang et al          | 2013 | British Journal of Surgery                  | 17                        | 3720                   | Triclosan coated sutures significantly reduced SSI rate compared to standard sutures. RR 0.7 (95% CI 0.57, 0.85).<br>Triclosan coated sutures significantly reduced SSI rate in 'clean' and 'clean-contaminated' surgery.                                    | Included     | Not included |
| Edmiston et al      | 2013 | Surgery                                     | 13                        | 3568                   | Triclosan coated sutures significantly reduced SSI rate compared to standard suture. RR 0.734 (95% CI 0.59, 0.91).<br>No subgroup analysis was performed.                                                                                                    | Not included | Not included |
| Daoud et al         | 2014 | Surgical infections                         | 15                        | 4800                   | Triclosan coated sutures significantly reduced SSI rate compared to standard sutures. RR 0.67 (95% 0.54, 0.84).<br>No subgroup analysis was performed.                                                                                                       | Not included | Not included |
| Apisarntharak et al | 2015 | Infection Control and Hospital Epidemiology | 29 (22 RCT and 7 non-RCT) | 11942                  | Triclosan coated sutures significantly reduced SSI rate compared to standard suture. RR 0.65 (95% CI 0.549, 0.769). RR for RCT alone 0.74 (95% CI 0.61, 0.89).<br>Triclosan coated sutures significantly reduced SSI rate for all CDC wound classifications. | Not included | Not included |

|    |               |      |                                                                    |                                                           |      |                                                                                                                                                                                                                                                                                                              |          |              |
|----|---------------|------|--------------------------------------------------------------------|-----------------------------------------------------------|------|--------------------------------------------------------------------------------------------------------------------------------------------------------------------------------------------------------------------------------------------------------------------------------------------------------------|----------|--------------|
| 1  |               |      |                                                                    |                                                           |      |                                                                                                                                                                                                                                                                                                              |          |              |
| 2  |               |      |                                                                    |                                                           |      |                                                                                                                                                                                                                                                                                                              |          |              |
| 3  | Guo et al     | 2015 | Journal of Surgical<br>Research                                    | 13                                                        | 5256 | Triclosan coated sutures significantly reduced risk of SSI compared to standard suture. RR 0.76 (95% CI 0.65, 0.88).<br><br>Triclosan coated sutures significantly reduced risk of SSI in abdominal surgery. RR 0.70 (95% CI 0.63, 0.99). There was no significant difference in cardiac and breast surgery. | Included | Not included |
| 4  |               |      |                                                                    |                                                           |      |                                                                                                                                                                                                                                                                                                              |          |              |
| 5  |               |      |                                                                    |                                                           |      |                                                                                                                                                                                                                                                                                                              |          |              |
| 6  |               |      |                                                                    |                                                           |      |                                                                                                                                                                                                                                                                                                              |          |              |
| 7  |               |      |                                                                    |                                                           |      |                                                                                                                                                                                                                                                                                                              |          |              |
| 8  |               |      |                                                                    |                                                           |      |                                                                                                                                                                                                                                                                                                              |          |              |
| 9  |               |      |                                                                    |                                                           |      |                                                                                                                                                                                                                                                                                                              |          |              |
| 10 |               |      |                                                                    |                                                           |      |                                                                                                                                                                                                                                                                                                              |          |              |
| 11 |               |      |                                                                    |                                                           |      |                                                                                                                                                                                                                                                                                                              |          |              |
| 12 |               |      |                                                                    |                                                           |      |                                                                                                                                                                                                                                                                                                              |          |              |
| 13 |               |      |                                                                    |                                                           |      |                                                                                                                                                                                                                                                                                                              |          |              |
| 14 |               |      |                                                                    |                                                           |      |                                                                                                                                                                                                                                                                                                              |          |              |
| 15 |               |      |                                                                    |                                                           |      |                                                                                                                                                                                                                                                                                                              |          |              |
| 16 |               |      |                                                                    |                                                           |      |                                                                                                                                                                                                                                                                                                              |          |              |
| 17 | Sandini et al | 2016 | Medicine                                                           | 6 (only<br>included<br>elective<br>colorectal<br>surgery) | 2168 | Triclosan coated sutures did not significantly reduce the risk of SSI compared to standard sutures in elective colorectal surgery. OR 0.81 (95% CI 0.58, 1.13)                                                                                                                                               | Included | Not included |
| 18 |               |      |                                                                    |                                                           |      |                                                                                                                                                                                                                                                                                                              |          |              |
| 19 |               |      |                                                                    |                                                           |      |                                                                                                                                                                                                                                                                                                              |          |              |
| 20 |               |      |                                                                    |                                                           |      |                                                                                                                                                                                                                                                                                                              |          |              |
| 21 |               |      |                                                                    |                                                           |      |                                                                                                                                                                                                                                                                                                              |          |              |
| 22 |               |      |                                                                    |                                                           |      |                                                                                                                                                                                                                                                                                                              |          |              |
| 23 |               |      |                                                                    |                                                           |      |                                                                                                                                                                                                                                                                                                              |          |              |
| 24 |               |      |                                                                    |                                                           |      |                                                                                                                                                                                                                                                                                                              |          |              |
| 25 |               |      |                                                                    |                                                           |      |                                                                                                                                                                                                                                                                                                              |          |              |
| 26 |               |      |                                                                    |                                                           |      |                                                                                                                                                                                                                                                                                                              |          |              |
| 27 |               |      |                                                                    |                                                           |      |                                                                                                                                                                                                                                                                                                              |          |              |
| 28 | Wu et al      | 2017 | European Journal<br>of Microbiology<br>and Infectious<br>Disorders | 18 (13 RCTs<br>and 5 non<br>RCTs)                         | 7458 | Triclosan coated sutures significantly reduced risk of SSI compared to standard suture in both the RCTs (OR 0.72; 95% CI 0.59, 0.88) and the non- RCTs (OR 0.58; 95% CI 0.40, 0.83). Triclosan coated sutures significantly reduced the risk of SSIS in clean surgery.                                       | Included | Included     |
| 29 |               |      |                                                                    |                                                           |      |                                                                                                                                                                                                                                                                                                              |          |              |
| 30 |               |      |                                                                    |                                                           |      |                                                                                                                                                                                                                                                                                                              |          |              |
| 31 |               |      |                                                                    |                                                           |      |                                                                                                                                                                                                                                                                                                              |          |              |
| 32 |               |      |                                                                    |                                                           |      |                                                                                                                                                                                                                                                                                                              |          |              |
| 33 |               |      |                                                                    |                                                           |      |                                                                                                                                                                                                                                                                                                              |          |              |
| 34 |               |      |                                                                    |                                                           |      |                                                                                                                                                                                                                                                                                                              |          |              |
| 35 |               |      |                                                                    |                                                           |      |                                                                                                                                                                                                                                                                                                              |          |              |
| 36 |               |      |                                                                    |                                                           |      |                                                                                                                                                                                                                                                                                                              |          |              |
| 37 |               |      |                                                                    |                                                           |      |                                                                                                                                                                                                                                                                                                              |          |              |
| 38 |               |      |                                                                    |                                                           |      |                                                                                                                                                                                                                                                                                                              |          |              |
| 39 |               |      |                                                                    |                                                           |      |                                                                                                                                                                                                                                                                                                              |          |              |
| 40 |               |      |                                                                    |                                                           |      |                                                                                                                                                                                                                                                                                                              |          |              |
| 41 |               |      |                                                                    |                                                           |      |                                                                                                                                                                                                                                                                                                              |          |              |
| 42 |               |      |                                                                    |                                                           |      |                                                                                                                                                                                                                                                                                                              |          |              |
| 43 |               |      |                                                                    |                                                           |      |                                                                                                                                                                                                                                                                                                              |          |              |
| 44 |               |      |                                                                    |                                                           |      |                                                                                                                                                                                                                                                                                                              |          |              |
| 45 |               |      |                                                                    |                                                           |      |                                                                                                                                                                                                                                                                                                              |          |              |
| 46 |               |      |                                                                    |                                                           |      |                                                                                                                                                                                                                                                                                                              |          |              |

|    |                     |      |                                 |                                                                           |       |                                                                                                                                                                                                                                                     |              |              |
|----|---------------------|------|---------------------------------|---------------------------------------------------------------------------|-------|-----------------------------------------------------------------------------------------------------------------------------------------------------------------------------------------------------------------------------------------------------|--------------|--------------|
| 1  | De Jonge et al      | 2017 | British Journal of<br>Surgery   | 21                                                                        | 6462  | Triclosan coated sutures significantly reduced risk of SSI compared to standard suture. RR 0.72 (95% CI 0.60, 0.86).                                                                                                                                | Included     | Not included |
| 2  |                     |      |                                 |                                                                           |       |                                                                                                                                                                                                                                                     |              |              |
| 3  |                     |      |                                 |                                                                           |       |                                                                                                                                                                                                                                                     |              |              |
| 4  |                     |      |                                 |                                                                           |       |                                                                                                                                                                                                                                                     |              |              |
| 5  | Leaper et al        | 2017 | British Journal of<br>Surgery   | 34 (20 RCTs<br>and 14 non-<br>RCTs)                                       | 16762 | Triclosan coated sutures significantly reduced risk of SSI compared to standard sutures. OR 0.61 (95% CI 0.52, 0.73).<br><br>No significant difference in SSI rate for 'contaminated' or 'dirty' wounds                                             | Not included | Not included |
| 6  |                     |      |                                 |                                                                           |       |                                                                                                                                                                                                                                                     |              |              |
| 7  |                     |      |                                 |                                                                           |       |                                                                                                                                                                                                                                                     |              |              |
| 8  |                     |      |                                 |                                                                           |       |                                                                                                                                                                                                                                                     |              |              |
| 9  |                     |      |                                 |                                                                           |       |                                                                                                                                                                                                                                                     |              |              |
| 10 |                     |      |                                 |                                                                           |       |                                                                                                                                                                                                                                                     |              |              |
| 11 |                     |      |                                 |                                                                           |       |                                                                                                                                                                                                                                                     |              |              |
| 12 |                     |      |                                 |                                                                           |       |                                                                                                                                                                                                                                                     |              |              |
| 13 |                     |      |                                 |                                                                           |       |                                                                                                                                                                                                                                                     |              |              |
| 14 |                     |      |                                 |                                                                           |       |                                                                                                                                                                                                                                                     |              |              |
| 15 |                     |      |                                 |                                                                           |       |                                                                                                                                                                                                                                                     |              |              |
| 16 |                     |      |                                 |                                                                           |       |                                                                                                                                                                                                                                                     |              |              |
| 17 | Konstantelias et al | 2017 | Acta Chirurgica<br>Belgica 2017 | 30 (19 RCTs<br>and 11 non-<br>RCTs)                                       | 15385 | Triclosan coated sutures significantly reduced risk of SSI compared to standard suture. RR 0.68 (95% CI 0.57, 0.81).<br><br>Triclosan coated sutures significantly reduced risk of SSI in 'clean', 'clean-contaminated' and 'contaminated surgery.' | Not included | Not included |
| 18 |                     |      |                                 |                                                                           |       |                                                                                                                                                                                                                                                     |              |              |
| 19 |                     |      |                                 |                                                                           |       |                                                                                                                                                                                                                                                     |              |              |
| 20 |                     |      |                                 |                                                                           |       |                                                                                                                                                                                                                                                     |              |              |
| 21 |                     |      |                                 |                                                                           |       |                                                                                                                                                                                                                                                     |              |              |
| 22 |                     |      |                                 |                                                                           |       |                                                                                                                                                                                                                                                     |              |              |
| 23 |                     |      |                                 |                                                                           |       |                                                                                                                                                                                                                                                     |              |              |
| 24 |                     |      |                                 |                                                                           |       |                                                                                                                                                                                                                                                     |              |              |
| 25 |                     |      |                                 |                                                                           |       |                                                                                                                                                                                                                                                     |              |              |
| 26 |                     |      |                                 |                                                                           |       |                                                                                                                                                                                                                                                     |              |              |
| 27 |                     |      |                                 |                                                                           |       |                                                                                                                                                                                                                                                     |              |              |
| 28 | Henriksen et al     | 2017 | Hernia                          | 8 (only<br>included<br>studies<br>reporting<br>abdominal<br>wall closure) | 3641  | Triclosan coated sutures significantly reduced risk of SSI compared to standard suture in abdominal wall closure.<br><br>OR 0.67 (95% CI 0.46, 0.98).                                                                                               | Not included | Not included |
| 29 |                     |      |                                 |                                                                           |       |                                                                                                                                                                                                                                                     |              |              |
| 30 |                     |      |                                 |                                                                           |       |                                                                                                                                                                                                                                                     |              |              |
| 31 |                     |      |                                 |                                                                           |       |                                                                                                                                                                                                                                                     |              |              |
| 32 |                     |      |                                 |                                                                           |       |                                                                                                                                                                                                                                                     |              |              |
| 33 |                     |      |                                 |                                                                           |       |                                                                                                                                                                                                                                                     |              |              |
| 34 |                     |      |                                 |                                                                           |       |                                                                                                                                                                                                                                                     |              |              |
| 35 |                     |      |                                 |                                                                           |       |                                                                                                                                                                                                                                                     |              |              |
| 36 |                     |      |                                 |                                                                           |       |                                                                                                                                                                                                                                                     |              |              |
| 37 |                     |      |                                 |                                                                           |       |                                                                                                                                                                                                                                                     |              |              |
| 38 |                     |      |                                 |                                                                           |       |                                                                                                                                                                                                                                                     |              |              |
| 39 |                     |      |                                 |                                                                           |       |                                                                                                                                                                                                                                                     |              |              |
| 40 |                     |      |                                 |                                                                           |       |                                                                                                                                                                                                                                                     |              |              |
| 41 |                     |      |                                 |                                                                           |       |                                                                                                                                                                                                                                                     |              |              |
| 42 |                     |      |                                 |                                                                           |       |                                                                                                                                                                                                                                                     |              |              |
| 43 |                     |      |                                 |                                                                           |       |                                                                                                                                                                                                                                                     |              |              |
| 44 |                     |      |                                 |                                                                           |       |                                                                                                                                                                                                                                                     |              |              |
| 45 |                     |      |                                 |                                                                           |       |                                                                                                                                                                                                                                                     |              |              |
| 46 |                     |      |                                 |                                                                           |       |                                                                                                                                                                                                                                                     |              |              |

1  
2  
3 Table 2: A summary of previous systematic reviews on this topic area highlighting number of studies, number of participants and key findings.  
4  
5  
6  
7  
8  
9  
10  
11  
12  
13  
14  
15  
16  
17  
18  
19  
20  
21  
22  
23  
24  
25  
26  
27  
28  
29  
30  
31  
32  
33  
34  
35  
36  
37  
38  
39  
40  
41  
42  
43  
44  
45  
46

For peer review only

1  
2  
3  
4  
5  
6  
7  
8  
9  
10  
11  
12  
13  
14  
15  
16  
17  
18  
19  
20  
21  
22  
23  
24  
25  
26  
27  
28  
29  
30  
31  
32  
33  
34  
35  
36  
37  
38  
39  
40  
41  
42  
43  
44  
45  
46  
47  
48  
49  
50  
51  
52  
53  
54  
55  
56  
57  
58  
59  
60

For peer review only



**Figure 1: PRISMA flow diagram of search results**

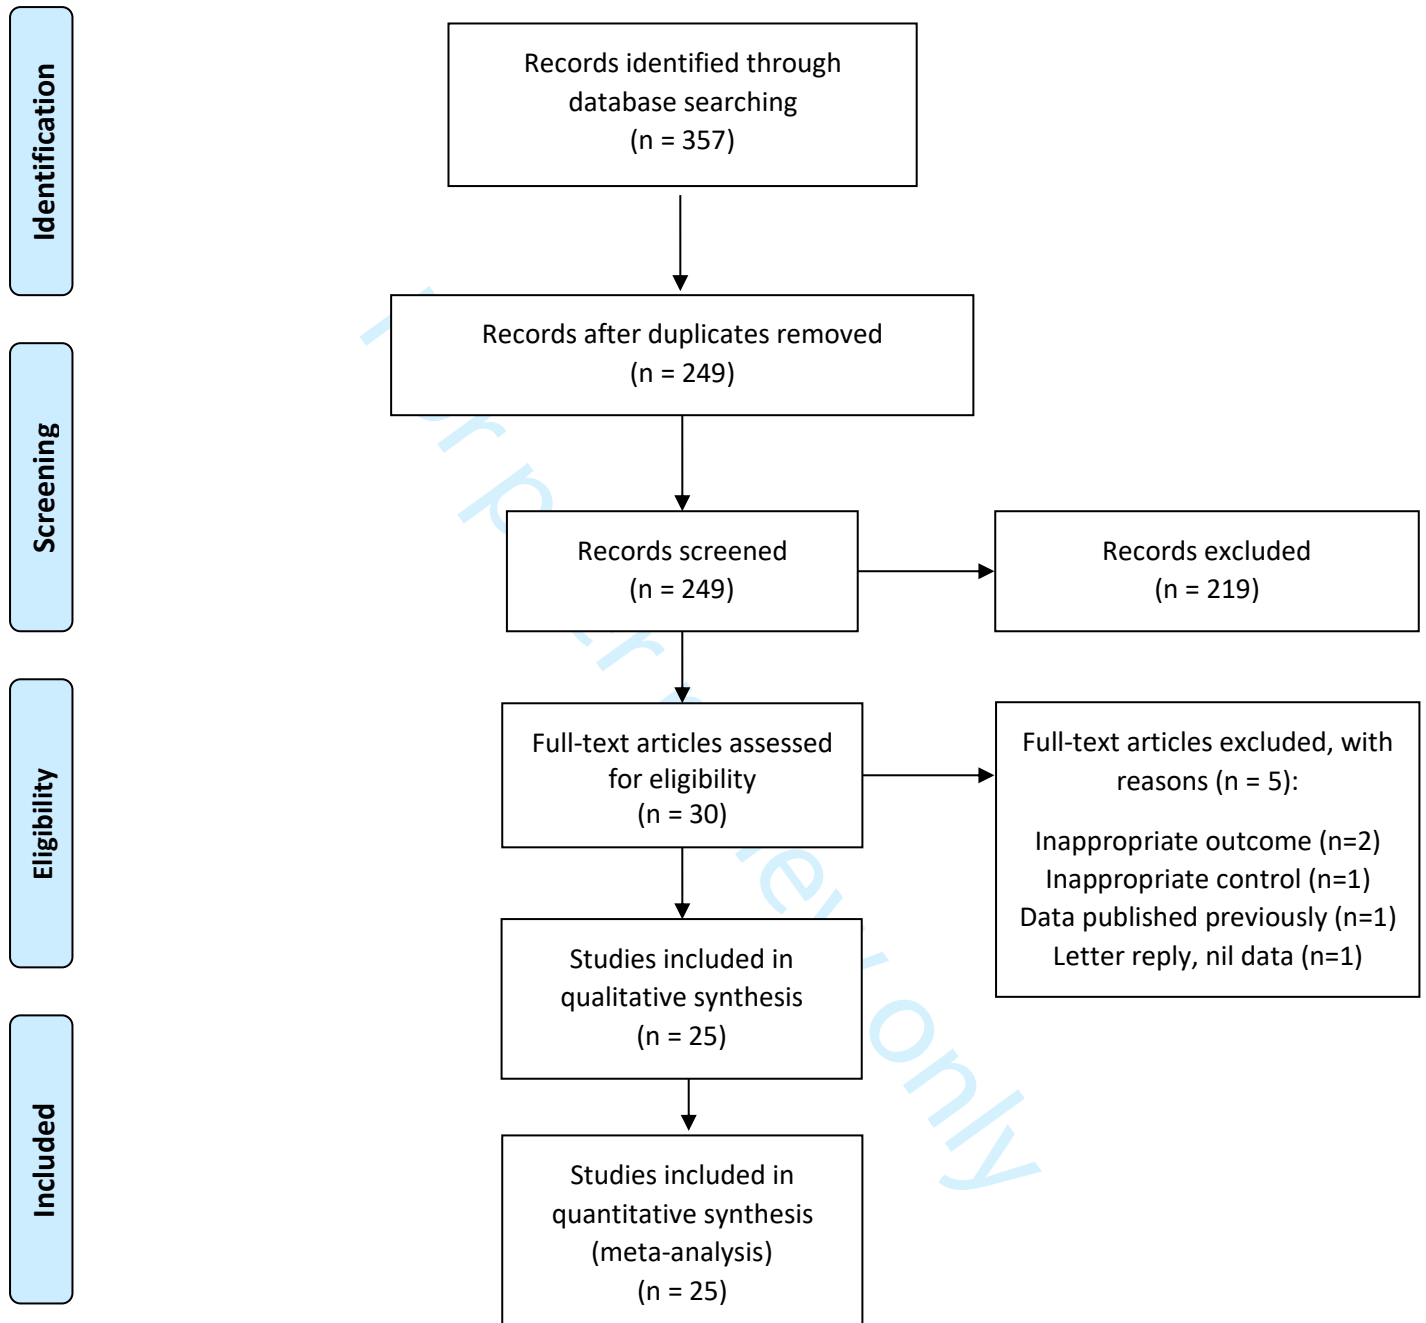



1  
2  
3  
4  
5  
6  
7  
8  
9  
10  
11  
12  
13  
14  
15  
16  
17  
18  
19  
20  
21  
22  
23  
24  
25  
26  
27  
28  
29  
30  
31  
32  
33  
34  
35  
36  
37  
38  
39  
40  
41  
42  
43  
44  
45  
46  
47  
48  
49  
50  
51  
52  
53  
54  
55  
56  
57  
58  
59  
60



Risk of bias legend  
 (A) Random sequence generation (selection bias)  
 (B) Allocation concealment (selection bias)  
 (C) Blinding of participants and personnel (performance bias)  
 (D) Blinding of outcome assessment (detection bias)  
 (E) Incomplete outcome data (attrition bias)  
 (F) Selective reporting (reporting bias)  
 (G) Other bias

1  
2  
3  
4  
5  
6  
7  
8  
9  
10  
11  
12  
13  
14  
15  
16  
17  
18  
19  
20  
21  
22  
23  
24  
25  
26  
27  
28  
29  
30  
31  
32  
33  
34  
35  
36  
37  
38  
39  
40  
41  
42  
43  
44  
45  
46  
47  
48  
49  
50  
51  
52  
53  
54  
55  
56  
57  
58  
59  
60



1  
2  
3  
4  
5  
6  
7  
8  
9  
10  
11  
12  
13  
14  
15  
16  
17  
18  
19  
20  
21  
22  
23  
24  
25  
26  
27  
28  
29  
30  
31  
32  
33  
34  
35  
36  
37  
38  
39  
40  
41  
42  
43  
44  
45  
46  
47  
48  
49  
50  
51  
52  
53  
54  
55  
56  
57  
58  
59  
60

1  
2  
3  
4  
5  
6  
7  
8  
9  
10  
11  
12  
13  
14  
15  
16  
17  
18  
19  
20  
21  
22  
23  
24  
25  
26  
27  
28  
29  
30  
31  
32  
33  
34  
35  
36  
37  
38  
39  
40  
41  
42  
43  
44  
45  
46  
47  
48  
49  
50  
51  
52  
53  
54  
55  
56  
57  
58  
59  
60



Supplementary file 1. Demonstrating the full search strategy and the number of results for each search term. The search was performed on the 31<sup>st</sup> May 2019.

Database: AMED (Allied and Complementary Medicine) <1985 to May 2019>, Ovid MEDLINE(R) <1946 to May Week 4 2019>, Embase <1974 to 2019 May 30>

Search Strategy:

```
-----  
1  triclosan.mp. (8754)  
2  anti-bacterial agents.mp. (315458)  
3  anti-infective agents, local.mp. (16419)  
4  coated materials, biocompatible.mp. (13821)  
5  biomimetic material.mp. (0)  
6  1 or 2 or 3 or 4 or 5 (350648)  
7  sutures.mp. (61707)  
8  vicryl plus.mp. (129)  
9  monocryl plus.mp. (20)  
10 PDS plus.mp. (47)  
11 7 or 8 or 9 or 10 (61743)  
12 surgical site infection.mp. (14995)  
13 surgical wound infection.mp. (37378)  
14 12 or 13 (48237)  
15 6 and 11 and 14 (282)  
16 remove duplicates from 15 (233)
```

\*\*\*\*\*

Then CENTRAL search identified 75, and after duplicates removed this was 16 new. So total 249 records screened.

1  
2  
3  
4  
5  
6  
7  
8  
9  
10  
11  
12  
13  
14  
15  
16  
17  
18  
19  
20  
21  
22  
23  
24  
25  
26  
27  
28  
29  
30  
31  
32  
33  
34  
35  
36  
37  
38  
39  
40  
41  
42  
43  
44  
45  
46  
47  
48  
49  
50  
51  
52  
53  
54  
55  
56  
57  
58  
59  
60

For peer review only



# PRISMA 2009 Checklist

| Section/topic                      | #  | Checklist item                                                                                                                                                                                                                                                                                              | Reported on page # |
|------------------------------------|----|-------------------------------------------------------------------------------------------------------------------------------------------------------------------------------------------------------------------------------------------------------------------------------------------------------------|--------------------|
| <b>TITLE</b>                       |    |                                                                                                                                                                                                                                                                                                             |                    |
| Title                              | 1  | Identify the report as a systematic review, meta-analysis, or both.                                                                                                                                                                                                                                         | 1                  |
| <b>ABSTRACT</b>                    |    |                                                                                                                                                                                                                                                                                                             |                    |
| Structured summary                 | 2  | Provide a structured summary including, as applicable: background; objectives; data sources; study eligibility criteria, participants, and interventions; study appraisal and synthesis methods; results; limitations; conclusions and implications of key findings; systematic review registration number. | 2                  |
| <b>INTRODUCTION</b>                |    |                                                                                                                                                                                                                                                                                                             |                    |
| Rationale                          | 3  | Describe the rationale for the review in the context of what is already known.                                                                                                                                                                                                                              | 4/5                |
| Objectives                         | 4  | Provide an explicit statement of questions being addressed with reference to participants, interventions, comparisons, outcomes, and study design (PICOS).                                                                                                                                                  | 6                  |
| <b>METHODS</b>                     |    |                                                                                                                                                                                                                                                                                                             |                    |
| Protocol and registration          | 5  | Indicate if a review protocol exists, if and where it can be accessed (e.g., Web address), and, if available, provide registration information including registration number.                                                                                                                               | 6                  |
| Eligibility criteria               | 6  | Specify study characteristics (e.g., PICOS, length of follow-up) and report characteristics (e.g., years considered, language, publication status) used as criteria for eligibility, giving rationale.                                                                                                      | 7-9 and table 1    |
| Information sources                | 7  | Describe all information sources (e.g., databases with dates of coverage, contact with study authors to identify additional studies) in the search and date last searched.                                                                                                                                  | 6                  |
| Search                             | 8  | Present full electronic search strategy for at least one database, including any limits used, such that it could be repeated.                                                                                                                                                                               | 6                  |
| Study selection                    | 9  | State the process for selecting studies (i.e., screening, eligibility, included in systematic review, and, if applicable, included in the meta-analysis).                                                                                                                                                   | 6/7                |
| Data collection process            | 10 | Describe method of data extraction from reports (e.g., piloted forms, independently, in duplicate) and any processes for obtaining and confirming data from investigators.                                                                                                                                  | 6/7                |
| Data items                         | 11 | List and define all variables for which data were sought (e.g., PICOS, funding sources) and any assumptions and simplifications made.                                                                                                                                                                       | 7                  |
| Risk of bias in individual studies | 12 | Describe methods used for assessing risk of bias of individual studies (including specification of whether this was done at the study or outcome level), and how this information is to be used in any data synthesis.                                                                                      | 7                  |
| Summary measures                   | 13 | State the principal summary measures (e.g., risk ratio, difference in means).                                                                                                                                                                                                                               | 8                  |
| Synthesis of results               | 14 | Describe the methods of handling data and combining results of studies, if done, including measures of consistency (e.g., I <sup>2</sup> ) for each meta-analysis. <a href="http://bmjopen.bmj.com/site/about/guidelines.xhtml">http://bmjopen.bmj.com/site/about/guidelines.xhtml</a>                      | 8                  |

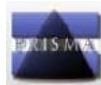

# PRISMA 2009 Checklist

Page 1 of 2

| Section/topic                 | #  | Checklist item                                                                                                                                                                                           | Reported on page # |
|-------------------------------|----|----------------------------------------------------------------------------------------------------------------------------------------------------------------------------------------------------------|--------------------|
| Risk of bias across studies   | 15 | Specify any assessment of risk of bias that may affect the cumulative evidence (e.g., publication bias, selective reporting within studies).                                                             | 7                  |
| Additional analyses           | 16 | Describe methods of additional analyses (e.g., sensitivity or subgroup analyses, meta-regression), if done, indicating which were pre-specified.                                                         | 8                  |
| <b>RESULTS</b>                |    |                                                                                                                                                                                                          |                    |
| Study selection               | 17 | Give numbers of studies screened, assessed for eligibility, and included in the review, with reasons for exclusions at each stage, ideally with a flow diagram.                                          | 8                  |
| Study characteristics         | 18 | For each study, present characteristics for which data were extracted (e.g., study size, PICOS, follow-up period) and provide the citations.                                                             | 8,9 table 1        |
| Risk of bias within studies   | 19 | Present data on risk of bias of each study and, if available, any outcome level assessment (see item 12).                                                                                                | 10, Figure 2       |
| Results of individual studies | 20 | For all outcomes considered (benefits or harms), present, for each study: (a) simple summary data for each intervention group (b) effect estimates and confidence intervals, ideally with a forest plot. | 9,10 Figure 2-5    |
| Synthesis of results          | 21 | Present results of each meta-analysis done, including confidence intervals and measures of consistency.                                                                                                  | 9,10 Figure 2-5    |
| Risk of bias across studies   | 22 | Present results of any assessment of risk of bias across studies (see Item 15).                                                                                                                          | 10, Figure 2       |
| Additional analysis           | 23 | Give results of additional analyses, if done (e.g., sensitivity or subgroup analyses, meta-regression [see Item 16]).                                                                                    | 9,10 Figure 2-5    |
| <b>DISCUSSION</b>             |    |                                                                                                                                                                                                          |                    |
| Summary of evidence           | 24 | Summarize the main findings including the strength of evidence for each main outcome; consider their relevance to key groups (e.g., healthcare providers, users, and policy makers).                     | 11, 12             |
| Limitations                   | 25 | Discuss limitations at study and outcome level (e.g., risk of bias), and at review-level (e.g., incomplete retrieval of identified research, reporting bias).                                            | 12,13              |
| Conclusions                   | 26 | Provide a general interpretation of the results in the context of other evidence, and implications for future research.                                                                                  | 13, 14             |



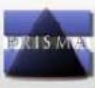

# PRISMA 2009 Checklist

1  
2  
3  
4  
5  
6  
7  
8  
9  
10  
11  
12  
13  
14  
15  
16  
17  
18  
19  
20  
21  
22  
23  
24  
25  
26  
27  
28  
29  
30  
31  
32  
33  
34  
35  
36  
37  
38  
39  
40  
41  
42  
43  
44  
45  
46  
47

|                |    |                                                                                                                                            |    |
|----------------|----|--------------------------------------------------------------------------------------------------------------------------------------------|----|
| <b>FUNDING</b> |    |                                                                                                                                            |    |
| Funding        | 27 | Describe sources of funding for the systematic review and other support (e.g., supply of data); role of funders for the systematic review. | 14 |

From: Moher D, Liberati A, Tetzlaff J, Altman DG, The PRISMA Group (2009). Preferred Reporting Items for Systematic Reviews and Meta-Analyses: The PRISMA Statement. PLoS Med 6(7): e1000097. doi:10.1371/journal.pmed1000097

For more information, visit: [www.prisma-statement.org](http://www.prisma-statement.org).

Page 2 of 2

For peer review only
