# Supplementary material for: The use of triclosan-coated sutures to prevent surgical site infections: a systematic review and meta-analysis of the literature
Source: PubMed Central journal article supplement — BMJ Open. 2019 Sep 3;9(9):e029727. doi: 10.1136/bmjopen-2019-029727 (PMC6731927; doi:10.1136/bmjopen-2019-029727), 2019-09-03
Supplement: bmjopen-2019-029727supp001.pdf [file bmjopen-2019-029727supp001.pdf]

Supplementary file 1. Demonstrating the full search strategy and the number of results for each search term. The search was performed on the 31<sup>st</sup> May 2019.

Database: AMED (Allied and Complementary Medicine) <1985 to May 2019>, Ovid MEDLINE(R) <1946 to May Week 4 2019>, Embase <1974 to 2019 May 30>

Search Strategy:

- 
- 1 triclosan.mp. (8754)
  - 2 anti-bacterial agents.mp. (315458)
  - 3 anti-infective agents, local.mp. (16419)
  - 4 coated materials, biocompatible.mp. (13821)
  - 5 biomimetic material.mp. (0)
  - 6 1 or 2 or 3 or 4 or 5 (350648)
  - 7 sutures.mp. (61707)
  - 8 vicryl plus.mp. (129)
  - 9 monocryl plus.mp. (20)
  - 10 PDS plus.mp. (47)
  - 11 7 or 8 or 9 or 10 (61743)
  - 12 surgical site infection.mp. (14995)
  - 13 surgical wound infection.mp. (37378)
  - 14 12 or 13 (48237)
  - 15 6 and 11 and 14 (282)
  - 16 remove duplicates from 15 (233)

\*\*\*\*\*

Then CENTRAL search identified 75, and after duplicates removed this was 16 new. So total 249 records screened.
